# Supplementary material for: ANKEF1 is a key axonemal component essential for murine sperm motility and male fertility
Source: eLife journal article supplement (doi:10.7554/elife.105321), 2025-02-21
Supplement: fig4-data1 [file Figure 4-Source data 1.pdf › Figure 4_Source data 1/Figure 4-Source data 1.pdf]

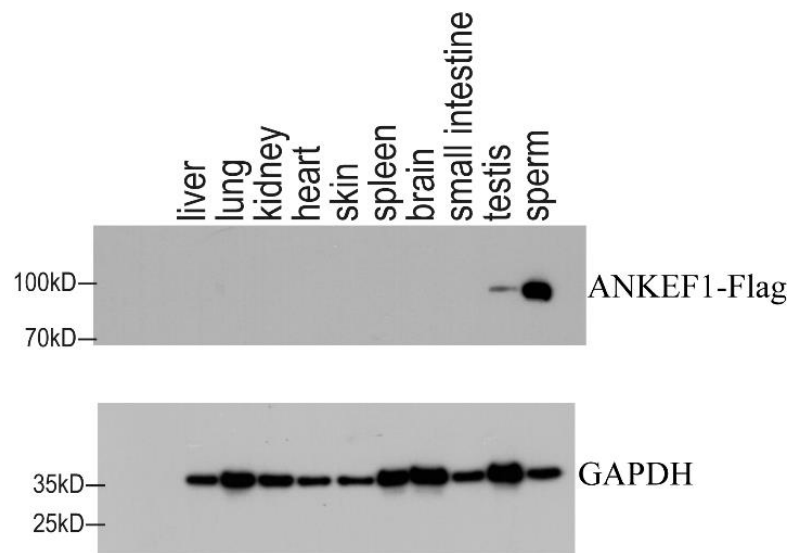

**Figure 4, Source Data 1.** Original, uncropped western blot membranes corresponding to Figure 4A. The upper membrane was probed with anti-Flag antibody, and the lower membrane with anti-GAPDH antibody. Lanes 1–10 correspond to protein lysates from the following mouse tissues: liver, lung, kidney, heart, skin, spleen, brain, small intestine, testis, and sperm. Pre-stained protein molecular weight markers were used (See Supplementary File 2 for antibody details).
