# Supplementary material for: ANKEF1 is a key axonemal component essential for murine sperm motility and male fertility
Source: eLife journal article supplement (doi:10.7554/elife.105321), 2025-02-21
Supplement: fig4-data3 [file Figure 4_Source Data 3.pdf › Figure 4_Source data 3/Figure 4_Source Data 3.pdf]

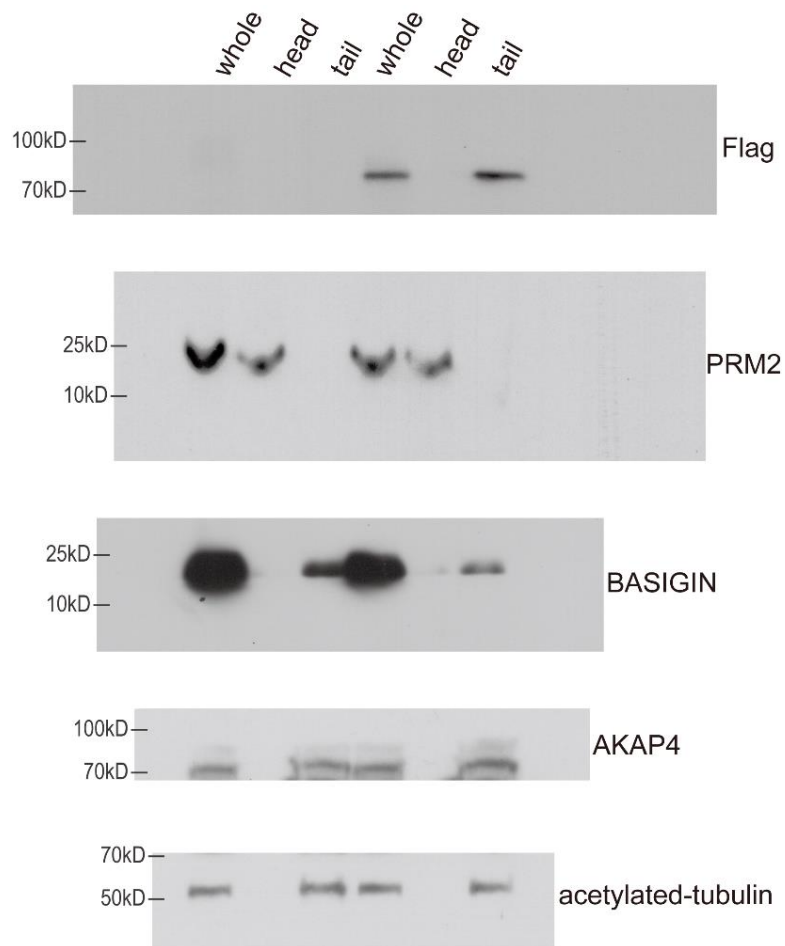

**Figure 4, Source Data 3.** Original, uncropped western blot membranes corresponding to Figure 4B. The membranes were sequentially probed with antibodies against: ANKEF1-Flag, PRM2 (sperm head marker), BASIGIN (membrane/cytosolic marker), AKAP4 (fibrous sheath marker), and acetylated tubulin (axonemal marker). For each blot, lanes correspond to: whole sperm, isolated sperm heads, and isolated sperm tails. Pre-stained protein molecular weight markers were used (See Supplementary File 2 for antibody details).
