# Supplementary material for: ANKEF1 is a key axonemal component essential for murine sperm motility and male fertility
Source: eLife journal article supplement (doi:10.7554/elife.105321), 2025-02-21
Supplement: fig4-data5 [file Figure 4_Source Data 5.pdf › Figure 4_Source data 5/Figure 4_Source Data 5.pdf]

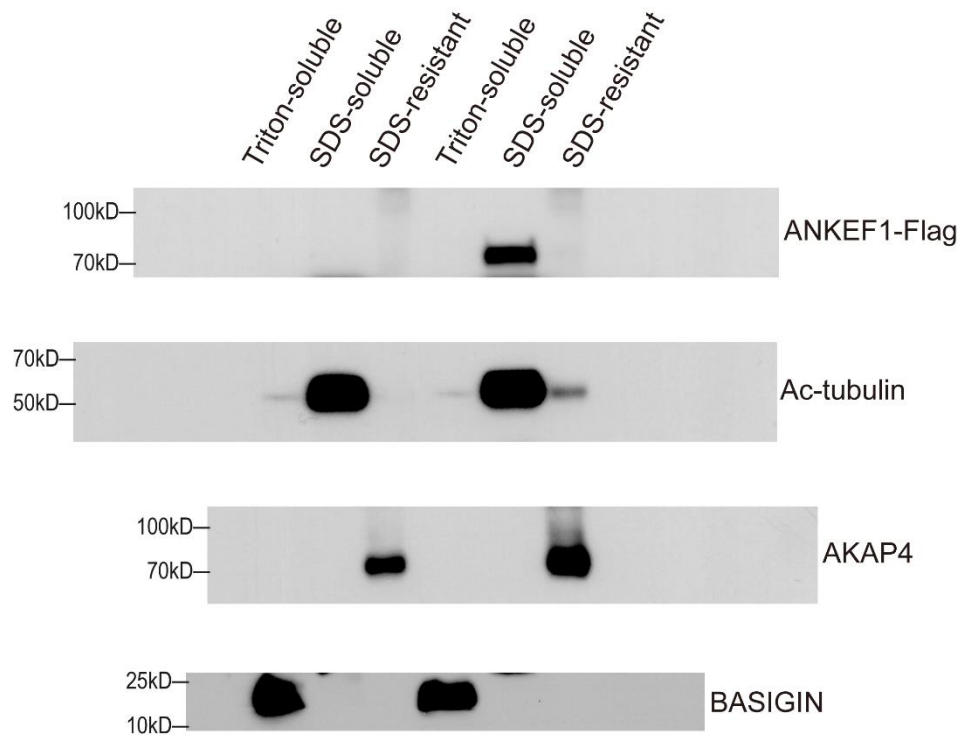

**Figure 4, Source Data 5.** Original, uncropped western blot membranes corresponding to Figure 4D. The membranes show the fractionation of sperm proteins using differential detergent solubilization. The blots were probed with antibodies against: ANKEF1-Flag,  $\alpha$ -tubulin (loading control), AKAP4 (SDS-resistant fraction marker), and BASIGIN (Triton X-100-soluble fraction marker). For each blot, lanes correspond to: Triton X-100-soluble fraction, SDS-soluble fraction, and SDS-resistant fraction. Pre-stained protein molecular weight markers were used (See Supplementary File 2 for antibody details).
