# Supplementary material for: ANKEF1 is a key axonemal component essential for murine sperm motility and male fertility
Source: eLife journal article supplement (doi:10.7554/elife.105321), 2025-02-21
Supplement: fig5-data5 [file Figure 5_Source Data 5.pdf › Figure 5_Source Data 5/Figure 5_Source Data 5.pdf]

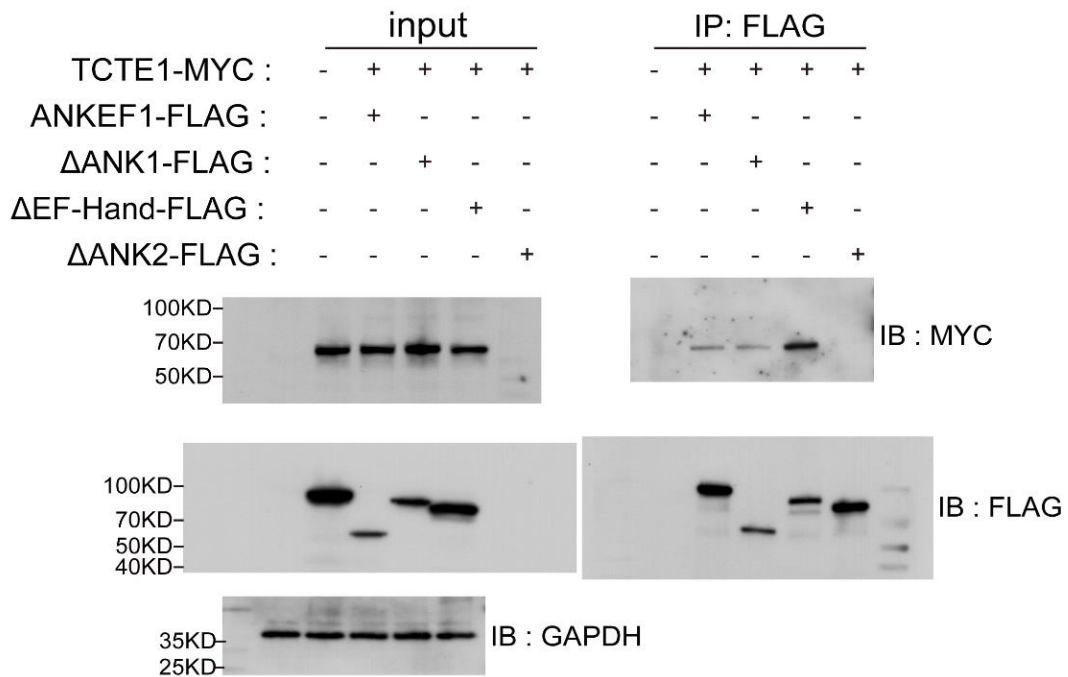

**Figure 5, Source Data 5.** Original, uncropped western blot membranes corresponding to Figure 5E. The membranes show co-immunoprecipitation (Co-IP) assays assessing the interaction between TCTE1-MYC and various truncated forms of ANKEF1-Flag expressed in HEK293T cells. From top to bottom, the blots were probed with: anti-MYC antibody (detecting TCTE1-MYC), anti-Flag antibody (detecting full-length or truncated ANKEF1-Flag proteins), and anti-GAPDH antibody (loading control). Lanes correspond to: input lysates (Input) and proteins immunoprecipitated with anti-Flag antibody (IP: FLAG). The schematic of each ANKEF1 truncation ( $\Delta$ ANK1,  $\Delta$ EF-Hand,  $\Delta$ ANK2) is illustrated in Figure 5D. Pre-stained protein molecular weight markers were used (See Supplementary File 2 for antibody details).
