# Supplementary material for: ANKEF1 is a key axonemal component essential for murine sperm motility and male fertility
Source: eLife. 2025 Dec 29;14:RP105321. doi: 10.7554/eLife.105321 (PMC12747526; doi:10.7554/eLife.105321)
Supplement: Figure 6—source data 1. [file elife-105321-fig6-data1.xlsx]

## Sheet: Description
This file contains the source data for Figure 6B and 6D.

## Sheet: HomvsHet
Protein accession	Protein description	Gene name	Hom/Het Ratio	Hom/Het P value	Regulated Type	Coverage [%]	Peptides	Razor + unique peptides	Unique peptides	Intensity Het_111	Intensity Het_113	Intensity Het_114	Intensity Hom_110	Intensity Hom_112	Intensity Hom_118	Het_111	Het_113	Het_114	Hom_110	Hom_112	Hom_118	Subcellular localization	KEGG KO No.	KEGG Gene	KEGG pathway	Biological Process	Cellular Component	Molecular Function	Pfam ID	Domain description	KOG category	KOG NO.	KOG description
Q9D2J7	Ankyrin repeat and EF-hand domain-containing protein 1 OS=Mus musculus OX=10090 GN=Ankef1 PE=2 SV=1	Ankef1	0.166273	0.00024902	Down	20.26	14	14	14	936836	990223	802840	130068	193695	130146	1.7655	1.86611	1.51298	0.245118	0.365025	0.245265	cytoplasm									M	KOG4177	Ankyrin
O54825	Bystin OS=Mus musculus OX=10090 GN=Bysl PE=1 SV=3	Bysl	0.365832	0.0240462	Down	2.06	1	1	1	20645.6	30896.5	31333.5	12246.5		7965.86	1.00136	1.49855	1.51975	0.593983		0.386362	cytoplasm	K14797			GO:0000003 reproduction; GO:0000462 maturation of SSU-rRNA from tricistronic rRNA transcript (SSU-rRNA, 5.8S rRNA, LSU-rRNA); GO:0001701 in utero embryonic development; GO:0001824 blastocyst development; GO:0001825 blastocyst formation; GO:0001829 trophectodermal cell differentiation; GO:0002237 response to molecule of bacterial origin; GO:0006139 nucleobase-containing compound metabolic process;…	GO:0005622 intracellular anatomical structure; GO:0005634 nucleus; GO:0005654 nucleoplasm; GO:0005730 nucleolus; GO:0005737 cytoplasm; GO:0005829 cytosol; GO:0005856 cytoskeleton; GO:0005874 microtubule; GO:0005881 cytoplasmic microtubule; GO:0015630 microtubule cytoskeleton; GO:0031974 membrane-enclosed lumen; GO:0031981 nuclear lumen; GO:0042995 cell projection; GO:0043226 organelle; GO:0043227…				W	KOG3871	Cell adhesion complex protein bystin
Q9JKB3	Y-box-binding protein 3 OS=Mus musculus OX=10090 GN=Ybx3 PE=1 SV=2	Ybx3	0.3791	0.000131067	Down	6.37	2	1	1	67229.9	70817.4	72938.2		27454.6	25868.4	1.27181	1.33967	1.37979		0.519367	0.48936	nucleus	K06099	CSDA; cold shock domain protein A	mmu04530 Tight junction	GO:0000003 reproduction; GO:0000122 negative regulation of transcription by RNA polymerase II; GO:0001701 in utero embryonic development; GO:0003006 developmental process involved in reproduction; GO:0006355 regulation of DNA-templated transcription; GO:0006357 regulation of transcription by RNA polymerase II; GO:0006417 regulation of translation; GO:0006950 response to stress; GO:0006970 respons…	GO:0005622 intracellular anatomical structure; GO:0005634 nucleus; GO:0005737 cytoplasm; GO:0005829 cytosol; GO:0005911 cell-cell junction; GO:0005921 gap junction; GO:0005923 bicellular tight junction; GO:0030054 cell junction; GO:0043226 organelle; GO:0043227 membrane-bounded organelle; GO:0043229 intracellular organelle; GO:0043231 intracellular membrane-bounded organelle; GO:0043296 apical ju…	GO:0000976 transcription cis-regulatory region binding; GO:0000977 RNA polymerase II transcription regulatory region sequence-specific DNA binding; GO:0000981 DNA-binding transcription factor activity, RNA polymerase II-specific; GO:0001067 transcription regulatory region nucleic acid binding; GO:0001227 DNA-binding transcription repressor activity, RNA polymerase II-specific; GO:0003676 nucleic …	PF00313	PF00313 'Cold-shock' DNA-binding domain	J	KOG3070	Predicted RNA-binding protein containing PIN domain and invovled in translation or RNA processing
O89023	Tripeptidyl-peptidase 1 OS=Mus musculus OX=10090 GN=Tpp1 PE=1 SV=2	Tpp1	0.383948	0.030533	Down	1.6	1	1	1	135765	112397	77461.3	35070.7	48277.5		1.65983	1.37414	0.947026	0.428767	0.590231		extracellular	K01279	TPP1; tripeptidyl-peptidase I [EC:3.4.14.9]	mmu04142 Lysosome	GO:0001894 tissue homeostasis; GO:0003008 system process; GO:0006508 proteolysis; GO:0006518 peptide metabolic process; GO:0006629 lipid metabolic process; GO:0006807 nitrogen compound metabolic process; GO:0006950 response to stress; GO:0006986 response to unfolded protein; GO:0006996 organelle organization; GO:0007033 vacuole organization; GO:0007040 lysosome organization; GO:0007154 cell commu…	GO:0000323 lytic vacuole; GO:0005622 intracellular anatomical structure; GO:0005737 cytoplasm; GO:0005764 lysosome; GO:0005773 vacuole; GO:0005775 vacuolar lumen; GO:0031974 membrane-enclosed lumen; GO:0043202 lysosomal lumen; GO:0043226 organelle; GO:0043227 membrane-bounded organelle; GO:0043229 intracellular organelle; GO:0043231 intracellular membrane-bounded organelle; GO:0043233 organelle l…	GO:0003824 catalytic activity; GO:0004175 endopeptidase activity; GO:0005488 binding; GO:0008233 peptidase activity; GO:0008236 serine-type peptidase activity; GO:0008238 exopeptidase activity; GO:0008240 tripeptidyl-peptidase activity; GO:0016787 hydrolase activity; GO:0017171 serine hydrolase activity; GO:0033218 amide binding; GO:0042277 peptide binding; GO:0140096 catalytic activity, acting o…	PF09286	PF09286 Pro-kumamolisin, activation domain
P20060	Beta-hexosaminidase subunit beta OS=Mus musculus OX=10090 GN=Hexb PE=1 SV=2	Hexb	0.394835	0.044521	Down	12.87	8	8	8	845434	1763720	714462	533991	400878	377410	1.0942	2.28269	0.924691	0.691117	0.518836	0.488462	endoplasmic reticulum	K12373	HEXA_B; hexosaminidase [EC:3.2.1.52]	mmu00511 Other glycan degradation; mmu00520 Amino sugar and nucleotide sugar metabolism; mmu00531 Glycosaminoglycan degradation; mmu01100 Metabolic pathways; mmu00513 Various types of N-glycan biosynthesis; mmu04142 Lysosome; mmu00604 Glycosphingolipid biosynthesis - ganglio series; mmu00600 Sphingolipid metabolism; mmu00603 Glycosphingolipid biosynthesis - globo and isoglobo series	GO:0000003 reproduction; GO:0000902 cell morphogenesis; GO:0001501 skeletal system development; GO:0001573 ganglioside metabolic process; GO:0001775 cell activation; GO:0002252 immune effector process; GO:0002263 cell activation involved in immune response; GO:0002274 myeloid leukocyte activation; GO:0002275 myeloid cell activation involved in immune response; GO:0002283 neutrophil activation inv…	GO:0000323 lytic vacuole; GO:0001669 acrosomal vesicle; GO:0005576 extracellular region; GO:0005615 extracellular space; GO:0005622 intracellular anatomical structure; GO:0005737 cytoplasm; GO:0005764 lysosome; GO:0005766 primary lysosome; GO:0005773 vacuole; GO:0005775 vacuolar lumen; GO:0012505 endomembrane system; GO:0016020 membrane; GO:0030141 secretory granule; GO:0031410 cytoplasmic vesicl…	GO:0003824 catalytic activity; GO:0004553 hydrolase activity, hydrolyzing O-glycosyl compounds; GO:0004563 beta-N-acetylhexosaminidase activity; GO:0005488 binding; GO:0005515 protein binding; GO:0008194 UDP-glycosyltransferase activity; GO:0008375 acetylglucosaminyltransferase activity; GO:0015929 hexosaminidase activity; GO:0016231 beta-N-acetylglucosaminidase activity; GO:0016740 transferase a…	PF14845; PF00728	PF14845 beta-acetyl hexosaminidase like; PF00728 Glycosyl hydrolase family 20, catalytic domain	G	KOG2499	Beta-N-acetylhexosaminidase
P01901	H-2 class I histocompatibility antigen, K-B alpha chain OS=Mus musculus OX=10090 GN=H2-K1 PE=1 SV=1	H2-K1	0.411752	0.045488	Down	11.38	4	2	2	113096	134717	169450	83150.8	59997.2	28660.9	1.15194	1.37216	1.72594	0.846934	0.611102	0.291926	plasma membrane	K06751	MHC1; MHC class I antigen	mmu04612 Antigen processing and presentation; mmu05165 Human papillomavirus infection; mmu04218 Cellular senescence; mmu05166 Human T-cell leukemia virus 1 infection; mmu05320 Autoimmune thyroid disease; mmu05332 Graft-versus-host disease; mmu05167 Kaposi sarcoma-associated herpesvirus infection; mmu05169 Epstein-Barr virus infection; mmu05330 Allograft rejection; mmu05163 Human cytomegalovirus i…	GO:0000003 reproduction; GO:0001775 cell activation; GO:0001816 cytokine production; GO:0001817 regulation of cytokine production; GO:0001819 positive regulation of cytokine production; GO:0001910 regulation of leukocyte mediated cytotoxicity; GO:0001911 negative regulation of leukocyte mediated cytotoxicity; GO:0001912 positive regulation of leukocyte mediated cytotoxicity; GO:0001914 regulation…	GO:0005576 extracellular region; GO:0005615 extracellular space; GO:0005622 intracellular anatomical structure; GO:0005737 cytoplasm; GO:0005783 endoplasmic reticulum; GO:0005789 endoplasmic reticulum membrane; GO:0005794 Golgi apparatus; GO:0005795 Golgi stack; GO:0005797 Golgi medial cisterna; GO:0005886 plasma membrane; GO:0009897 external side of plasma membrane; GO:0009986 cell surface; GO:0…	GO:0003823 antigen binding; GO:0005102 signaling receptor binding; GO:0005488 binding; GO:0005515 protein binding; GO:0030881 beta-2-microglobulin binding; GO:0033218 amide binding; GO:0042277 peptide binding; GO:0042287 MHC protein binding; GO:0042288 MHC class I protein binding; GO:0042605 peptide antigen binding; GO:0042608 T cell receptor binding; GO:0044877 protein-containing complex binding…	PF00129; PF07654	PF00129 Class I Histocompatibility antigen, domains alpha 1 and 2; PF07654 Immunoglobulin C1-set domain
P07091	Protein S100-A4 OS=Mus musculus OX=10090 GN=S100a4 PE=1 SV=1	S100a4	0.425315	0.041713	Down	23.76	2	2	2	350641	569116	802520	314281	217771	200458	0.857038	1.39104	1.96152	0.768167	0.532277	0.48996	extracellular	K23761			GO:0001667 ameboidal-type cell migration; GO:0001837 epithelial to mesenchymal transition; GO:0007275 multicellular organism development; GO:0009888 tissue development; GO:0009966 regulation of signal transduction; GO:0009967 positive regulation of signal transduction; GO:0009987 cellular process; GO:0010631 epithelial cell migration; GO:0010646 regulation of cell communication; GO:0010647 positi…	GO:0005622 intracellular anatomical structure; GO:0005634 nucleus; GO:0005737 cytoplasm; GO:0042995 cell projection; GO:0043005 neuron projection; GO:0043226 organelle; GO:0043227 membrane-bounded organelle; GO:0043229 intracellular organelle; GO:0043231 intracellular membrane-bounded organelle; GO:0048471 perinuclear region of cytoplasm; GO:0120025 plasma membrane bounded cell projection;	GO:0003779 actin binding; GO:0005102 signaling receptor binding; GO:0005488 binding; GO:0005509 calcium ion binding; GO:0005515 protein binding; GO:0008092 cytoskeletal protein binding; GO:0042802 identical protein binding; GO:0042803 protein homodimerization activity; GO:0043167 ion binding; GO:0043169 cation binding; GO:0046872 metal ion binding; GO:0046982 protein heterodimerization activity; …	PF01023	PF01023 S-100/ICaBP type calcium binding domain
Q8BPU7	Engulfment and cell motility protein 1 OS=Mus musculus OX=10090 GN=Elmo1 PE=1 SV=2	Elmo1	0.463931	0.0131473	Down	2.75	2	2	2	181022	219587	297635	129878	91069.2	102990	1.06256	1.28893	1.74706	0.762358	0.534558	0.604531	cytoplasm	K12366	ELMO1; engulfment and cell motility protein 1	mmu04148 Efferocytosis; mmu04062 Chemokine signaling pathway; mmu05100 Bacterial invasion of epithelial cells; mmu05135 Yersinia infection; mmu05132 Salmonella infection	GO:0000003 reproduction; GO:0000132 establishment of mitotic spindle orientation; GO:0000226 microtubule cytoskeleton organization; GO:0000278 mitotic cell cycle; GO:0000768 syncytium formation by plasma membrane fusion; GO:0001667 ameboidal-type cell migration; GO:0002064 epithelial cell development; GO:0002065 columnar/cuboidal epithelial cell differentiation; GO:0002066 columnar/cuboidal epith…	GO:0005622 intracellular anatomical structure; GO:0005634 nucleus; GO:0005737 cytoplasm; GO:0005829 cytosol; GO:0005886 plasma membrane; GO:0016020 membrane; GO:0032045 guanyl-nucleotide exchange factor complex; GO:0032991 protein-containing complex; GO:0043226 organelle; GO:0043227 membrane-bounded organelle; GO:0043229 intracellular organelle; GO:0043231 intracellular membrane-bounded organelle…	GO:0005102 signaling receptor binding; GO:0005488 binding; GO:0005515 protein binding; GO:0005543 phospholipid binding; GO:0005547 phosphatidylinositol-3,4,5-trisphosphate binding; GO:0008289 lipid binding; GO:0017124 SH3 domain binding; GO:0019899 enzyme binding; GO:0019900 kinase binding; GO:0019901 protein kinase binding; GO:0019904 protein domain specific binding; GO:0030971 receptor tyrosine…	PF16457	PF16457 Pleckstrin homology domain	T	KOG2999	Regulator of Rac1, required for phagocytosis and cell migration
O88643	Serine/threonine-protein kinase PAK 1 OS=Mus musculus OX=10090 GN=Pak1 PE=1 SV=1	Pak1	0.466148	0.0115619	Down	2.2	1	1	1	206740	140715	138430	92374.7	63725.1	70394.5	1.74126	1.18517	1.16592	0.778024	0.536723	0.592896	cytoplasm,nucleus	K04409	PAK1; p21-activated kinase 1 [EC:2.7.11.1]	mmu04810 Regulation of actin cytoskeleton; mmu04012 ErbB signaling pathway; mmu04510 Focal adhesion; mmu04392 Hippo signaling pathway - multiple species; mmu04014 Ras signaling pathway; mmu05205 Proteoglycans in cancer; mmu04650 Natural killer cell mediated cytotoxicity; mmu05170 Human immunodeficiency virus 1 infection; mmu04625 C-type lectin receptor signaling pathway; mmu04010 MAPK signaling p…	GO:0000003 reproduction; GO:0000165 MAPK cascade; GO:0000902 cell morphogenesis; GO:0001558 regulation of cell growth; GO:0001666 response to hypoxia; GO:0001700 embryonic development via the syncytial blastoderm; GO:0001763 morphogenesis of a branching structure; GO:0001932 regulation of protein phosphorylation; GO:0001934 positive regulation of protein phosphorylation; GO:0002009 morphogenesis …	GO:0001726 ruffle; GO:0005622 intracellular anatomical structure; GO:0005634 nucleus; GO:0005635 nuclear envelope; GO:0005737 cytoplasm; GO:0005768 endosome; GO:0005829 cytosol; GO:0005856 cytoskeleton; GO:0005886 plasma membrane; GO:0005911 cell-cell junction; GO:0005912 adherens junction; GO:0005925 focal adhesion; GO:0012505 endomembrane system; GO:0014069 postsynaptic density; GO:0014704 inte…	GO:0000166 nucleotide binding; GO:0001882 nucleoside binding; GO:0001883 purine nucleoside binding; GO:0003824 catalytic activity; GO:0004672 protein kinase activity; GO:0004674 protein serine/threonine kinase activity; GO:0004708 MAP kinase kinase activity; GO:0004709 MAP kinase kinase kinase activity; GO:0004712 protein serine/threonine/tyrosine kinase activity; GO:0005488 binding; GO:0005515 p…	PF00786; PF00069	PF00786 P21-Rho-binding domain; PF00069 Protein kinase domain	T	KOG0578	p21-activated serine/threonine protein kinase
Q8R1Z9	E3 ubiquitin ligase Rnf121 OS=Mus musculus OX=10090 GN=Rnf121 PE=1 SV=1	Rnf121	0.474463	0.0158108	Down	2.75	1	1	1	44251.9	48537.8	44351.1	15272.4	20190.1	29605.8	1.31305	1.44023	1.316	0.453167	0.599086	0.878471	plasma membrane	K15698			GO:0006508 proteolysis; GO:0006511 ubiquitin-dependent protein catabolic process; GO:0006807 nitrogen compound metabolic process; GO:0006950 response to stress; GO:0006986 response to unfolded protein; GO:0007154 cell communication; GO:0007165 signal transduction; GO:0008152 metabolic process; GO:0009056 catabolic process; GO:0009057 macromolecule catabolic process; GO:0009987 cellular process; G…	GO:0000139 Golgi membrane; GO:0005622 intracellular anatomical structure; GO:0005737 cytoplasm; GO:0005783 endoplasmic reticulum; GO:0005789 endoplasmic reticulum membrane; GO:0005794 Golgi apparatus; GO:0012505 endomembrane system; GO:0016020 membrane; GO:0016528 sarcoplasm; GO:0016529 sarcoplasmic reticulum; GO:0031090 organelle membrane; GO:0031984 organelle subcompartment; GO:0033017 sarcopla…	GO:0003824 catalytic activity; GO:0004842 ubiquitin-protein transferase activity; GO:0005488 binding; GO:0008270 zinc ion binding; GO:0016740 transferase activity; GO:0019787 ubiquitin-like protein transferase activity; GO:0043167 ion binding; GO:0043169 cation binding; GO:0046872 metal ion binding; GO:0046914 transition metal ion binding; GO:0061630 ubiquitin protein ligase activity; GO:0061659 …			O	KOG1734	Predicted RING-containing E3 ubiquitin ligase
Q8VDW0	ATP-dependent RNA helicase DDX39A OS=Mus musculus OX=10090 GN=Ddx39a PE=1 SV=1	Ddx39a	0.484538	0.0203542	Down	14.29	6	2	2	95580.2	130234	109907	71404.2	38306	52959.6	1.15067	1.56785	1.32314	0.859617	0.461156	0.637567	cytoplasm	K13182			GO:0000375 RNA splicing, via transesterification reactions; GO:0000377 RNA splicing, via transesterification reactions with bulged adenosine as nucleophile; GO:0000381 regulation of alternative mRNA splicing, via spliceosome; GO:0000398 mRNA splicing, via spliceosome; GO:0006139 nucleobase-containing compound metabolic process; GO:0006325 chromatin organization; GO:0006338 chromatin remodeling; G…	GO:0000346 transcription export complex; GO:0005622 intracellular anatomical structure; GO:0005634 nucleus; GO:0005654 nucleoplasm; GO:0005667 transcription regulator complex; GO:0005681 spliceosomal complex; GO:0005730 nucleolus; GO:0005737 cytoplasm; GO:0016604 nuclear body; GO:0016607 nuclear speck; GO:0031974 membrane-enclosed lumen; GO:0031981 nuclear lumen; GO:0032991 protein-containing com…	GO:0003724 RNA helicase activity; GO:0003824 catalytic activity; GO:0004386 helicase activity; GO:0005488 binding; GO:0005515 protein binding; GO:0008134 transcription factor binding; GO:0008186 ATP-dependent activity, acting on RNA; GO:0016462 pyrophosphatase activity; GO:0016787 hydrolase activity; GO:0016817 hydrolase activity, acting on acid anhydrides; GO:0016818 hydrolase activity, acting o…	PF00270; PF00271	PF00270 DEAD/DEAH box helicase; PF00271 Helicase conserved C-terminal domain	A	KOG0329	ATP-dependent RNA helicase
Q3UJU9	Regulator of microtubule dynamics protein 3 OS=Mus musculus OX=10090 GN=Rmdn3 PE=1 SV=2	Rmdn3	0.504224	0.0359688	Down	2.13	1	1	1	103765	196907	137752	73899.5	86726.5	60437.8	0.944051	1.79145	1.25326	0.672335	0.789035	0.549861	extracellular,plasma membrane	K23293			GO:0006873 intracellular monoatomic ion homeostasis; GO:0006874 intracellular calcium ion homeostasis; GO:0009987 cellular process; GO:0019725 cellular homeostasis; GO:0030003 intracellular monoatomic cation homeostasis; GO:0042592 homeostatic process; GO:0048878 chemical homeostasis; GO:0050801 monoatomic ion homeostasis; GO:0055074 calcium ion homeostasis; GO:0055080 monoatomic cation homeostas…	GO:0000922 spindle pole; GO:0005622 intracellular anatomical structure; GO:0005634 nucleus; GO:0005737 cytoplasm; GO:0005739 mitochondrion; GO:0005740 mitochondrial envelope; GO:0005741 mitochondrial outer membrane; GO:0005819 spindle; GO:0005856 cytoskeleton; GO:0015630 microtubule cytoskeleton; GO:0016020 membrane; GO:0019867 outer membrane; GO:0031090 organelle membrane; GO:0031966 mitochondri…
Q9CZX0	Elongator complex protein 3 OS=Mus musculus OX=10090 GN=Elp3 PE=1 SV=1	Elp3	0.519877	0.00257287	Down	3.84	2	2	2	208108	215864	192716	119123	113247	88232.2	1.33219	1.38184	1.23366	0.762558	0.724943	0.564812	cytoplasm	K07739			GO:0000003 reproduction; GO:0000902 cell morphogenesis; GO:0001764 neuron migration; GO:0001932 regulation of protein phosphorylation; GO:0002097 tRNA wobble base modification; GO:0002098 tRNA wobble uridine modification; GO:0002119 nematode larval development; GO:0002164 larval development; GO:0002165 instar larval or pupal development; GO:0002168 instar larval development; GO:0002376 immune sys…	GO:0000123 histone acetyltransferase complex; GO:0005622 intracellular anatomical structure; GO:0005634 nucleus; GO:0005654 nucleoplasm; GO:0005730 nucleolus; GO:0005737 cytoplasm; GO:0008023 transcription elongation factor complex; GO:0031248 protein acetyltransferase complex; GO:0031974 membrane-enclosed lumen; GO:0031981 nuclear lumen; GO:0032991 protein-containing complex; GO:0033588 elongato…	GO:0003824 catalytic activity; GO:0004402 histone acetyltransferase activity; GO:0008080 N-acetyltransferase activity; GO:0008607 phosphorylase kinase regulator activity; GO:0010484 histone H3 acetyltransferase activity; GO:0010485 histone H4 acetyltransferase activity; GO:0016407 acetyltransferase activity; GO:0016410 N-acyltransferase activity; GO:0016740 transferase activity; GO:0016746 acyltr…	PF04055	PF04055 Radical SAM superfamily	BK	KOG2535	RNA polymerase II elongator complex, subunit ELP3/histone acetyltransferase
O89017	Legumain OS=Mus musculus OX=10090 GN=Lgmn PE=1 SV=1	Lgmn	0.520732	0.015813	Down	3.22	1	1	1	47494.5	42173.6	70599.1	27768.7	27486.9	28200.6	1.16922	1.03823	1.73801	0.683612	0.676674	0.694244	extracellular	K01369	LGMN; legumain [EC:3.4.22.34]	mmu04612 Antigen processing and presentation; mmu04142 Lysosome	GO:0002376 immune system process; GO:0002478 antigen processing and presentation of exogenous peptide antigen; GO:0002495 antigen processing and presentation of peptide antigen via MHC class II; GO:0002504 antigen processing and presentation of peptide or polysaccharide antigen via MHC class II; GO:0002682 regulation of immune system process; GO:0002684 positive regulation of immune system proces…	GO:0000323 lytic vacuole; GO:0005576 extracellular region; GO:0005622 intracellular anatomical structure; GO:0005737 cytoplasm; GO:0005764 lysosome; GO:0005768 endosome; GO:0005770 late endosome; GO:0005773 vacuole; GO:0005775 vacuolar lumen; GO:0012505 endomembrane system; GO:0031410 cytoplasmic vesicle; GO:0031904 endosome lumen; GO:0031974 membrane-enclosed lumen; GO:0031982 vesicle; GO:003601…	GO:0003824 catalytic activity; GO:0004175 endopeptidase activity; GO:0004197 cysteine-type endopeptidase activity; GO:0008233 peptidase activity; GO:0008234 cysteine-type peptidase activity; GO:0016787 hydrolase activity; GO:0140096 catalytic activity, acting on a protein;			O	KOG1348	Asparaginyl peptidases
P62317	Small nuclear ribonucleoprotein Sm D2 OS=Mus musculus OX=10090 GN=Snrpd2 PE=1 SV=1	Snrpd2	0.521521	0.00705921	Down	16.95	2	2	2	340064	463152	437761	232313	180602	234281	1.08061	1.47175	1.39106	0.738215	0.573894	0.744469	cytoplasm	K11096	SNRPD2; small nuclear ribonucleoprotein D2	mmu03040 Spliceosome	GO:0000245 spliceosomal complex assembly; GO:0000375 RNA splicing, via transesterification reactions; GO:0000377 RNA splicing, via transesterification reactions with bulged adenosine as nucleophile; GO:0000387 spliceosomal snRNP assembly; GO:0000398 mRNA splicing, via spliceosome; GO:0006139 nucleobase-containing compound metabolic process; GO:0006396 RNA processing; GO:0006397 mRNA processing; G…	GO:0005622 intracellular anatomical structure; GO:0005634 nucleus; GO:0005654 nucleoplasm; GO:0005681 spliceosomal complex; GO:0005682 U5 snRNP; GO:0005684 U2-type spliceosomal complex; GO:0005685 U1 snRNP; GO:0005686 U2 snRNP; GO:0005687 U4 snRNP; GO:0005689 U12-type spliceosomal complex; GO:0005737 cytoplasm; GO:0005829 cytosol; GO:0030532 small nuclear ribonucleoprotein complex; GO:0031974 mem…	GO:0005488 binding; GO:0043021 ribonucleoprotein complex binding; GO:0044877 protein-containing complex binding; GO:0070990 snRNP binding; GO:1990446 U1 snRNP binding;	PF01423	PF01423 LSM domain	A	KOG3459	Small nuclear ribonucleoprotein (snRNP) Sm core protein
Q9D753	Exosome complex component RRP43 OS=Mus musculus OX=10090 GN=Exosc8 PE=1 SV=1	Exosc8	0.52168	0.0106044	Down	7.97	2	2	2	127446	135313	185527	85583.8	82356.9	65921.2	1.12098	1.19018	1.63185	0.752773	0.72439	0.579826	extracellular	K12586	RRP43; exosome complex component RRP43	mmu03018 RNA degradation	GO:0000288 nuclear-transcribed mRNA catabolic process, deadenylation-dependent decay; GO:0000291 nuclear-transcribed mRNA catabolic process, exonucleolytic; GO:0000460 maturation of 5.8S rRNA; GO:0000466 maturation of 5.8S rRNA from tricistronic rRNA transcript (SSU-rRNA, 5.8S rRNA, LSU-rRNA); GO:0000467 exonucleolytic trimming to generate mature 3'-end of 5.8S rRNA from tricistronic rRNA transcr…	GO:0000176 nuclear exosome (RNase complex); GO:0000177 cytoplasmic exosome (RNase complex); GO:0000178 exosome (RNase complex); GO:0005622 intracellular anatomical structure; GO:0005634 nucleus; GO:0005654 nucleoplasm; GO:0005737 cytoplasm; GO:0005829 cytosol; GO:0031974 membrane-enclosed lumen; GO:0031981 nuclear lumen; GO:0032991 protein-containing complex; GO:0043226 organelle; GO:0043227 memb…	GO:0003676 nucleic acid binding; GO:0003723 RNA binding; GO:0005488 binding; GO:0005515 protein binding; GO:0042802 identical protein binding; GO:0097159 organic cyclic compound binding; GO:1901363 heterocyclic compound binding;	PF01138; PF03725	PF01138 3' exoribonuclease family, domain 1; PF03725 3' exoribonuclease family, domain 2	J	KOG1613	Exosomal 3'-5' exoribonuclease complex, subunit Rrp43
P58404	Striatin-4 OS=Mus musculus OX=10090 GN=Strn4 PE=1 SV=2	Strn4	0.531616	0.0286121	Down	1.32	1	1	0	111141	112918	107716	79347.4	57312.6	39717	1.3123	1.33328	1.27186	0.936894	0.676718	0.468958	nucleus	K17608				GO:0030425 dendrite; GO:0032991 protein-containing complex; GO:0036477 somatodendritic compartment; GO:0042995 cell projection; GO:0043005 neuron projection; GO:0043197 dendritic spine; GO:0044309 neuron spine; GO:0045202 synapse; GO:0097447 dendritic tree; GO:0098794 postsynapse; GO:0120025 plasma membrane bounded cell projection;	GO:0005488 binding; GO:0005515 protein binding; GO:0005516 calmodulin binding; GO:0019899 enzyme binding; GO:0019902 phosphatase binding; GO:0019903 protein phosphatase binding; GO:0019904 protein domain specific binding; GO:0044877 protein-containing complex binding; GO:0051721 protein phosphatase 2A binding; GO:0070016 armadillo repeat domain binding;			D	KOG0642	Cell-cycle nuclear protein, contains WD-40 repeats
Q8R570	Synaptosomal-associated protein 47 OS=Mus musculus OX=10090 GN=Snap47 PE=1 SV=1	Snap47	0.532501	0.0130724	Down	2.66	1	1	1	73167.6	78546	54275.7	42747.8	36068.3	30873.5	1.39067	1.4929	1.0316	0.812493	0.685538	0.586802	cytoplasm,nucleus	K18212			GO:0006810 transport; GO:0006836 neurotransmitter transport; GO:0006886 intracellular protein transport; GO:0006887 exocytosis; GO:0006906 vesicle fusion; GO:0006996 organelle organization; GO:0007154 cell communication; GO:0007267 cell-cell signaling; GO:0007268 chemical synaptic transmission; GO:0007269 neurotransmitter secretion; GO:0008104 protein localization; GO:0009987 cellular process; GO…	GO:0005622 intracellular anatomical structure; GO:0005737 cytoplasm; GO:0005886 plasma membrane; GO:0008021 synaptic vesicle; GO:0012505 endomembrane system; GO:0012506 vesicle membrane; GO:0016020 membrane; GO:0030133 transport vesicle; GO:0030425 dendrite; GO:0030658 transport vesicle membrane; GO:0030659 cytoplasmic vesicle membrane; GO:0030672 synaptic vesicle membrane; GO:0031090 organelle m…	GO:0000149 SNARE binding; GO:0005484 SNAP receptor activity; GO:0005488 binding; GO:0005515 protein binding; GO:0019905 syntaxin binding;			U	KOG3065	SNAP-25 (synaptosome-associated protein) component of SNARE complex
Q3UA37	Transcriptional regulator QRICH1 OS=Mus musculus OX=10090 GN=Qrich1 PE=1 SV=1	Qrich1	0.538456	0.00729025	Down	1.42	1	1	1	50098.3	53296.1	41820.9	25939.1	26188.9		1.26932	1.35034	1.0596	0.657208	0.663537		nucleus	K24297			GO:0006355 regulation of DNA-templated transcription; GO:0006357 regulation of transcription by RNA polymerase II; GO:0006996 organelle organization; GO:0007010 cytoskeleton organization; GO:0007275 multicellular organism development; GO:0009889 regulation of biosynthetic process; GO:0009987 cellular process; GO:0010468 regulation of gene expression; GO:0010556 regulation of macromolecule biosynt…	GO:0005622 intracellular anatomical structure; GO:0005634 nucleus; GO:0005654 nucleoplasm; GO:0005737 cytoplasm; GO:0031974 membrane-enclosed lumen; GO:0031981 nuclear lumen; GO:0043226 organelle; GO:0043227 membrane-bounded organelle; GO:0043229 intracellular organelle; GO:0043231 intracellular membrane-bounded organelle; GO:0043233 organelle lumen; GO:0070013 intracellular organelle lumen;	GO:0000981 DNA-binding transcription factor activity, RNA polymerase II-specific; GO:0003676 nucleic acid binding; GO:0003677 DNA binding; GO:0003700 DNA-binding transcription factor activity; GO:0005488 binding; GO:0097159 organic cyclic compound binding; GO:0140110 transcription regulator activity; GO:1901363 heterocyclic compound binding;
Q8C0I1	Alkyldihydroxyacetonephosphate synthase, peroxisomal OS=Mus musculus OX=10090 GN=Agps PE=1 SV=1	Agps	0.54103	0.0316185	Down	7.91	4	4	4	168356	284614	183936	134954	102522	107109	1.02919	1.73989	1.12443	0.824994	0.626732	0.654773	cytoplasm	K00803	AGPS; alkyldihydroxyacetonephosphate synthase [EC:2.5.1.26]	mmu00565 Ether lipid metabolism; mmu04146 Peroxisome; mmu01100 Metabolic pathways	GO:0006605 protein targeting; GO:0006625 protein targeting to peroxisome; GO:0006629 lipid metabolic process; GO:0006662 glycerol ether metabolic process; GO:0006810 transport; GO:0006886 intracellular protein transport; GO:0006996 organelle organization; GO:0007031 peroxisome organization; GO:0008104 protein localization; GO:0008152 metabolic process; GO:0008610 lipid biosynthetic process; GO:00…	GO:0005622 intracellular anatomical structure; GO:0005634 nucleus; GO:0005730 nucleolus; GO:0005737 cytoplasm; GO:0005739 mitochondrion; GO:0005777 peroxisome; GO:0005778 peroxisomal membrane; GO:0005782 peroxisomal matrix; GO:0005829 cytosol; GO:0016020 membrane; GO:0031090 organelle membrane; GO:0031903 microbody membrane; GO:0031907 microbody lumen; GO:0031974 membrane-enclosed lumen; GO:00319…	GO:0000166 nucleotide binding; GO:0003824 catalytic activity; GO:0005488 binding; GO:0008609 alkylglycerone-phosphate synthase activity; GO:0016740 transferase activity; GO:0016765 transferase activity, transferring alkyl or aryl (other than methyl) groups; GO:0036094 small molecule binding; GO:0043167 ion binding; GO:0043168 anion binding; GO:0050660 flavin adenine dinucleotide binding; GO:00719…	PF01565; PF02913	PF01565 FAD binding domain ; PF02913 FAD linked oxidases, C-terminal domain	R	KOG1233	Alkyl-dihydroxyacetonephosphate synthase
Q8C9S4	Coiled-coil domain-containing protein 186 OS=Mus musculus OX=10090 GN=Ccdc186 PE=1 SV=2	Ccdc186	0.543138	0.0390846	Down	2.07	2	2	2	41513.2	73264.2	71134.9	37338.7	32370.2	31267.2	0.868209	1.53225	1.48772	0.780904	0.676992	0.653924	nucleus				GO:0006996 organelle organization; GO:0009987 cellular process; GO:0010256 endomembrane system organization; GO:0016043 cellular component organization; GO:0016050 vesicle organization; GO:0021700 developmental maturation; GO:0032502 developmental process; GO:0033363 secretory granule organization; GO:0040012 regulation of locomotion; GO:0050789 regulation of biological process; GO:0050795 regula…	GO:0005622 intracellular anatomical structure; GO:0005737 cytoplasm; GO:0005794 Golgi apparatus; GO:0005802 trans-Golgi network; GO:0012505 endomembrane system; GO:0030424 axon; GO:0031984 organelle subcompartment; GO:0036477 somatodendritic compartment; GO:0042995 cell projection; GO:0043005 neuron projection; GO:0043025 neuronal cell body; GO:0043226 organelle; GO:0043227 membrane-bounded organ…	GO:0005488 binding; GO:0005515 protein binding; GO:0019899 enzyme binding; GO:0031267 small GTPase binding; GO:0051020 GTPase binding;			W	KOG1836	Extracellular matrix glycoprotein Laminin subunits alpha and gamma
Q9CZW5	Mitochondrial import receptor subunit TOM70 OS=Mus musculus OX=10090 GN=Tomm70 PE=1 SV=2	Tomm70	0.546892	0.0267309	Down	2.95	2	2	2	254598	386537	231714	139361	171378	166615	1.13138	1.71768	1.02969	0.619289	0.761565	0.7404	cytoplasm	K17768	TOM70; mitochondrial import receptor subunit TOM70	mmu04137 Mitophagy - animal	GO:0001101 response to acid chemical; GO:0001558 regulation of cell growth; GO:0006605 protein targeting; GO:0006626 protein targeting to mitochondrion; GO:0006810 transport; GO:0006839 mitochondrial transport; GO:0006886 intracellular protein transport; GO:0006996 organelle organization; GO:0007005 mitochondrion organization; GO:0008104 protein localization; GO:0009719 response to endogenous sti…	GO:0005622 intracellular anatomical structure; GO:0005737 cytoplasm; GO:0005739 mitochondrion; GO:0005740 mitochondrial envelope; GO:0005741 mitochondrial outer membrane; GO:0005742 mitochondrial outer membrane translocase complex; GO:0016020 membrane; GO:0019867 outer membrane; GO:0031090 organelle membrane; GO:0031966 mitochondrial membrane; GO:0031967 organelle envelope; GO:0031968 organelle o…	GO:0005215 transporter activity; GO:0008320 protein transmembrane transporter activity; GO:0015399 primary active transmembrane transporter activity; GO:0015450 protein-transporting ATPase activity; GO:0022804 active transmembrane transporter activity; GO:0022857 transmembrane transporter activity; GO:0022884 macromolecule transmembrane transporter activity; GO:0042887 amide transmembrane transpo…			U	KOG0547	Translocase of outer mitochondrial membrane complex, subunit TOM70/TOM72
Q8C2E7	WASH complex subunit 5 OS=Mus musculus OX=10090 GN=Washc5 PE=1 SV=2	Washc5	0.561285	0.0388165	Down	0.95	1	1	1	60142.5	50441.1	50973.5	38291.6	20091.3	32296.6	1.43062	1.19985	1.21252	0.91085	0.477916	0.768245	cytoplasm	K18464	RTSC; WASH complex subunit strumpellin	mmu04144 Endocytosis	GO:0000003 reproduction; GO:0000212 meiotic spindle organization; GO:0000226 microtubule cytoskeleton organization; GO:0000280 nuclear division; GO:0000902 cell morphogenesis; GO:0000910 cytokinesis; GO:0001556 oocyte maturation; GO:0003006 developmental process involved in reproduction; GO:0003008 system process; GO:0003013 circulatory system process; GO:0003015 heart process; GO:0006810 transpo…	GO:0005622 intracellular anatomical structure; GO:0005634 nucleus; GO:0005654 nucleoplasm; GO:0005737 cytoplasm; GO:0005768 endosome; GO:0005769 early endosome; GO:0012505 endomembrane system; GO:0031410 cytoplasmic vesicle; GO:0031974 membrane-enclosed lumen; GO:0031981 nuclear lumen; GO:0031982 vesicle; GO:0032991 protein-containing complex; GO:0036477 somatodendritic compartment; GO:0042995 ce…				S	KOG3666	Uncharacterized conserved protein
Q8R0X7	Sphingosine-1-phosphate lyase 1 OS=Mus musculus OX=10090 GN=Sgpl1 PE=1 SV=1	Sgpl1	0.575154	0.0207297	Down	2.82	1	1	1	250160	238462	278412	191869	117695	131599	1.24231	1.18422	1.38262	0.952836	0.584482	0.653531	plasma membrane	K01634	SGPL1; sphinganine-1-phosphate aldolase [EC:4.1.2.27]	mmu01100 Metabolic pathways; mmu00600 Sphingolipid metabolism; mmu04071 Sphingolipid signaling pathway	GO:0000003 reproduction; GO:0001501 skeletal system development; GO:0001553 luteinization; GO:0001568 blood vessel development; GO:0001570 vasculogenesis; GO:0001655 urogenital system development; GO:0001667 ameboidal-type cell migration; GO:0001822 kidney development; GO:0001944 vasculature development; GO:0002376 immune system process; GO:0002520 immune system development; GO:0003006 developmen…	GO:0005622 intracellular anatomical structure; GO:0005737 cytoplasm; GO:0005783 endoplasmic reticulum; GO:0005789 endoplasmic reticulum membrane; GO:0012505 endomembrane system; GO:0016020 membrane; GO:0031984 organelle subcompartment; GO:0042175 nuclear outer membrane-endoplasmic reticulum membrane network; GO:0043226 organelle; GO:0043227 membrane-bounded organelle; GO:0043229 intracellular org…	GO:0003824 catalytic activity; GO:0008117 sphinganine-1-phosphate aldolase activity; GO:0016829 lyase activity; GO:0016830 carbon-carbon lyase activity; GO:0016832 aldehyde-lyase activity;	PF00282	PF00282 Pyridoxal-dependent decarboxylase conserved domain	E	KOG1383	Glutamate decarboxylase/sphingosine phosphate lyase
Q9QXF8	Glycine N-methyltransferase OS=Mus musculus OX=10090 GN=Gnmt PE=1 SV=3	Gnmt	0.575863	0.00510877	Down	3.41	1	1	1	100222	86358.7	84852	60810.7	49870.3	45627.1	1.40583	1.21137	1.19023	0.853003	0.69954	0.64002	cytoplasm,nucleus	K00552	GNMT; glycine N-methyltransferase [EC:2.1.1.20]	mmu00260 Glycine, serine and threonine metabolism; mmu00270 Cysteine and methionine metabolism; mmu01100 Metabolic pathways	GO:0000096 sulfur amino acid metabolic process; GO:0005975 carbohydrate metabolic process; GO:0005976 polysaccharide metabolic process; GO:0005977 glycogen metabolic process; GO:0006082 organic acid metabolic process; GO:0006091 generation of precursor metabolites and energy; GO:0006109 regulation of carbohydrate metabolic process; GO:0006111 regulation of gluconeogenesis; GO:0006112 energy reser…	GO:0005622 intracellular anatomical structure; GO:0005634 nucleus; GO:0005737 cytoplasm; GO:0005829 cytosol; GO:0032991 protein-containing complex; GO:0034708 methyltransferase complex; GO:0043226 organelle; GO:0043227 membrane-bounded organelle; GO:0043229 intracellular organelle; GO:0043231 intracellular membrane-bounded organelle; GO:1902494 catalytic complex; GO:1990234 transferase complex;	GO:0003824 catalytic activity; GO:0005488 binding; GO:0005515 protein binding; GO:0005542 folic acid binding; GO:0008168 methyltransferase activity; GO:0008170 N-methyltransferase activity; GO:0008757 S-adenosylmethionine-dependent methyltransferase activity; GO:0016594 glycine binding; GO:0016597 amino acid binding; GO:0016740 transferase activity; GO:0016741 transferase activity, transferring o…	PF13847	PF13847 Methyltransferase domain
Q9JIA7	Sphingosine kinase 2 OS=Mus musculus OX=10090 GN=Sphk2 PE=1 SV=2	Sphk2	0.576036	0.0466156	Down	8.59	4	4	4	119107	143659	154728	75681.9	108406	56403.5	1.08611	1.30999	1.41092	0.690124	0.988526	0.514329	nucleus	K04718	SPHK; sphingosine kinase [EC:2.7.1.91]	mmu04370 VEGF signaling pathway; mmu04371 Apelin signaling pathway; mmu04666 Fc gamma R-mediated phagocytosis; mmu01100 Metabolic pathways; mmu04071 Sphingolipid signaling pathway; mmu05152 Tuberculosis; mmu04020 Calcium signaling pathway; mmu04148 Efferocytosis; mmu00600 Sphingolipid metabolism; mmu04072 Phospholipase D signaling pathway	GO:0000003 reproduction; GO:0001516 prostaglandin biosynthetic process; GO:0001558 regulation of cell growth; GO:0001568 blood vessel development; GO:0001676 long-chain fatty acid metabolic process; GO:0001817 regulation of cytokine production; GO:0001932 regulation of protein phosphorylation; GO:0001934 positive regulation of protein phosphorylation; GO:0001944 vasculature development; GO:000195…	GO:0000323 lytic vacuole; GO:0005622 intracellular anatomical structure; GO:0005737 cytoplasm; GO:0005764 lysosome; GO:0005765 lysosomal membrane; GO:0005773 vacuole; GO:0005774 vacuolar membrane; GO:0005829 cytosol; GO:0005886 plasma membrane; GO:0008021 synaptic vesicle; GO:0012505 endomembrane system; GO:0016020 membrane; GO:0030133 transport vesicle; GO:0030424 axon; GO:0031090 organelle memb…	GO:0000166 nucleotide binding; GO:0000287 magnesium ion binding; GO:0001727 lipid kinase activity; GO:0003676 nucleic acid binding; GO:0003677 DNA binding; GO:0003824 catalytic activity; GO:0004143 ATP-dependent diacylglycerol kinase activity; GO:0004888 transmembrane signaling receptor activity; GO:0004930 G protein-coupled receptor activity; GO:0005488 binding; GO:0005515 protein binding; GO:00…	PF19279	PF19279 YegS C-terminal NAD kinase beta sandwich-like domain	IT	KOG1116	Sphingosine kinase, involved in sphingolipid metabolism
Q9CQ73	Plakophilin-2 OS=Mus musculus OX=10090 GN=Pkp2 PE=1 SV=1	Pkp2	0.57674	0.0384574	Down	2.64	2	2	2	67513.9	85385.8	60203.2	53334.9	31432.1	38138	1.20558	1.52471	1.07503	0.952387	0.561274	0.68102	nucleus	K12642	PKP2; plakophilin 2	mmu05412 Arrhythmogenic right ventricular cardiomyopathy	GO:0001508 action potential; GO:0002027 regulation of heart rate; GO:0002028 regulation of sodium ion transport; GO:0002159 desmosome assembly; GO:0002934 desmosome organization; GO:0003007 heart morphogenesis; GO:0003008 system process; GO:0003012 muscle system process; GO:0003013 circulatory system process; GO:0003015 heart process; GO:0003205 cardiac chamber development; GO:0003206 cardiac cha…	GO:0001533 cornified envelope; GO:0005622 intracellular anatomical structure; GO:0005634 nucleus; GO:0005654 nucleoplasm; GO:0005856 cytoskeleton; GO:0005882 intermediate filament; GO:0005886 plasma membrane; GO:0005911 cell-cell junction; GO:0005912 adherens junction; GO:0014704 intercalated disc; GO:0016020 membrane; GO:0030054 cell junction; GO:0030057 desmosome; GO:0031974 membrane-enclosed l…	GO:0005080 protein kinase C binding; GO:0005198 structural molecule activity; GO:0005488 binding; GO:0005515 protein binding; GO:0016247 channel regulator activity; GO:0017080 sodium channel regulator activity; GO:0019215 intermediate filament binding; GO:0019899 enzyme binding; GO:0019900 kinase binding; GO:0019901 protein kinase binding; GO:0044325 transmembrane transporter binding; GO:0044877 …			TW	KOG1048	Neural adherens junction protein Plakophilin and related Armadillo repeat proteins
Q8BT51	Cytochrome c oxidase assembly factor 4 homolog, mitochondrial OS=Mus musculus OX=10090 GN=COA4 PE=3 SV=1	COA4	0.578596	0.0499466	Down	11.49	1	1	1	99159.7	135966	119413	56805.3		79951.1	1.00917	1.38375	1.21529	0.578118		0.813677	extracellular	K18177	COA4; cytochrome c oxidase assembly factor 4	mmu04714 Thermogenesis	GO:0006996 organelle organization; GO:0007005 mitochondrion organization; GO:0008535 respiratory chain complex IV assembly; GO:0009987 cellular process; GO:0016043 cellular component organization; GO:0017004 cytochrome complex assembly; GO:0022607 cellular component assembly; GO:0033108 mitochondrial respiratory chain complex assembly; GO:0033617 mitochondrial cytochrome c oxidase assembly; GO:00…	GO:0005622 intracellular anatomical structure; GO:0005737 cytoplasm; GO:0005739 mitochondrion; GO:0005740 mitochondrial envelope; GO:0005758 mitochondrial intermembrane space; GO:0031967 organelle envelope; GO:0031970 organelle envelope lumen; GO:0031974 membrane-enclosed lumen; GO:0031975 envelope; GO:0043226 organelle; GO:0043227 membrane-bounded organelle; GO:0043229 intracellular organelle; G…		PF06747	PF06747 CHCH domain	R	KOG4138	Unchracterized conserved protein (estrogen up-regulated protein E2IG2 in human)
P63254	Cysteine-rich protein 1 OS=Mus musculus OX=10090 GN=Crip1 PE=1 SV=2	Crip1	0.578611	0.000286067	Down	29.87	2	2	2	5230180	4905910	4908690	3057400	2673490	2974180	1.32132	1.2394	1.2401	0.772401	0.675412	0.751377	nucleus	K24412			GO:0000003 reproduction; GO:0001655 urogenital system development; GO:0001738 morphogenesis of a polarized epithelium; GO:0002009 morphogenesis of an epithelium; GO:0002064 epithelial cell development; GO:0002376 immune system process; GO:0003006 developmental process involved in reproduction; GO:0003008 system process; GO:0006915 apoptotic process; GO:0006950 response to stress; GO:0006955 immun…	GO:0005622 intracellular anatomical structure; GO:0005737 cytoplasm;	GO:0003676 nucleic acid binding; GO:0003677 DNA binding; GO:0003680 minor groove of adenine-thymine-rich DNA binding; GO:0003690 double-stranded DNA binding; GO:0005488 binding; GO:0005515 protein binding; GO:0008270 zinc ion binding; GO:0008301 DNA binding, bending; GO:0033218 amide binding; GO:0042277 peptide binding; GO:0043167 ion binding; GO:0043169 cation binding; GO:0043565 sequence-specif…	PF00412	PF00412 LIM domain	TZ	KOG1700	Regulatory protein MLP and related LIM proteins
Q3UQ44	Ras GTPase-activating-like protein IQGAP2 OS=Mus musculus OX=10090 GN=Iqgap2 PE=1 SV=2	Iqgap2	0.579016	0.00356275	Down	6.41	10	8	8	424657	332265	323893	208907	214093	202809	1.49297	1.16815	1.13871	0.734457	0.75269	0.713018	nucleus	K05767	IQGAP2_3; Ras GTPase-activating-like protein IQGAP2/3	mmu04810 Regulation of actin cytoskeleton	GO:0000902 cell morphogenesis; GO:0001655 urogenital system development; GO:0001775 cell activation; GO:0001817 regulation of cytokine production; GO:0001822 kidney development; GO:0001932 regulation of protein phosphorylation; GO:0001934 positive regulation of protein phosphorylation; GO:0001952 regulation of cell-matrix adhesion; GO:0001954 positive regulation of cell-matrix adhesion; GO:000206…	GO:0001726 ruffle; GO:0005622 intracellular anatomical structure; GO:0005634 nucleus; GO:0005737 cytoplasm; GO:0005829 cytosol; GO:0005856 cytoskeleton; GO:0005874 microtubule; GO:0005886 plasma membrane; GO:0005902 microvillus; GO:0005911 cell-cell junction; GO:0009898 cytoplasmic side of plasma membrane; GO:0009986 cell surface; GO:0012505 endomembrane system; GO:0012506 vesicle membrane; GO:00…	GO:0003779 actin binding; GO:0004857 enzyme inhibitor activity; GO:0005095 GTPase inhibitor activity; GO:0005488 binding; GO:0005515 protein binding; GO:0005516 calmodulin binding; GO:0005543 phospholipid binding; GO:0005547 phosphatidylinositol-3,4,5-trisphosphate binding; GO:0008047 enzyme activator activity; GO:0008092 cytoskeletal protein binding; GO:0008289 lipid binding; GO:0019207 kinase r…	PF00307	PF00307 Calponin homology (CH) domain	T	KOG2128	Ras GTPase-activating protein family - IQGAP
Q9CQI6	Coactosin-like protein OS=Mus musculus OX=10090 GN=Cotl1 PE=1 SV=3	Cotl1	0.579889	0.0197228	Down	14.79	3	3	3	3281580	3787160	5182780	2552280	2281800	2270440	1.01723	1.17395	1.60656	0.791158	0.707314	0.703793	cytoplasm				GO:0001775 cell activation; GO:0002252 immune effector process; GO:0002263 cell activation involved in immune response; GO:0002274 myeloid leukocyte activation; GO:0002275 myeloid cell activation involved in immune response; GO:0002283 neutrophil activation involved in immune response; GO:0002366 leukocyte activation involved in immune response; GO:0002376 immune system process; GO:0002443 leukoc…	GO:0005576 extracellular region; GO:0005622 intracellular anatomical structure; GO:0005737 cytoplasm; GO:0012505 endomembrane system; GO:0030141 secretory granule; GO:0031410 cytoplasmic vesicle; GO:0031974 membrane-enclosed lumen; GO:0031982 vesicle; GO:0031983 vesicle lumen; GO:0034774 secretory granule lumen; GO:0043226 organelle; GO:0043227 membrane-bounded organelle; GO:0043229 intracellular…	GO:0003779 actin binding; GO:0005488 binding; GO:0005515 protein binding; GO:0008092 cytoskeletal protein binding; GO:0019899 enzyme binding;	PF00241	PF00241 Cofilin/tropomyosin-type actin-binding protein	Z	KOG3655	Drebrins and related actin binding proteins
Q80YV4	4'-phosphopantetheine phosphatase OS=Mus musculus OX=10090 GN=Pank4 PE=1 SV=2	Pank4	0.585771	0.00573881	Down	3.78	3	3	3	138314	120594	122775	84785.6	62273.5	76519.9	1.37112	1.19546	1.21708	0.840485	0.617321	0.758547	nucleus	K24265						PF01937	PF01937 Damage-control phosphatase ARMT1-like domain	R	KOG4584	Uncharacterized conserved protein
Q7TSV4	Phosphopentomutase OS=Mus musculus OX=10090 GN=Pgm2 PE=1 SV=1	Pgm2	0.586456	0.0144098	Down	1.77	1	1	1	142830	147519	189029	108647	78484.6	94002.7	1.12685	1.16384	1.49133	0.857162	0.619198	0.741627	cytoplasm	K15779	PGM2; phosphoglucomutase / phosphopentomutase [EC:5.4.2.2 5.4.2.7]	mmu00520 Amino sugar and nucleotide sugar metabolism; mmu00030 Pentose phosphate pathway; mmu01100 Metabolic pathways; mmu00500 Starch and sucrose metabolism; mmu00230 Purine metabolism; mmu00010 Glycolysis / Gluconeogenesis; mmu00052 Galactose metabolism; mmu01250 Biosynthesis of nucleotide sugars	GO:0000271 polysaccharide biosynthetic process; GO:0000272 polysaccharide catabolic process; GO:0001775 cell activation; GO:0002252 immune effector process; GO:0002263 cell activation involved in immune response; GO:0002274 myeloid leukocyte activation; GO:0002275 myeloid cell activation involved in immune response; GO:0002283 neutrophil activation involved in immune response; GO:0002366 leukocyt…	GO:0005576 extracellular region; GO:0005622 intracellular anatomical structure; GO:0005737 cytoplasm; GO:0005829 cytosol; GO:0012505 endomembrane system; GO:0030141 secretory granule; GO:0031410 cytoplasmic vesicle; GO:0031974 membrane-enclosed lumen; GO:0031982 vesicle; GO:0031983 vesicle lumen; GO:0034774 secretory granule lumen; GO:0043226 organelle; GO:0043227 membrane-bounded organelle; GO:0…	GO:0003824 catalytic activity; GO:0004614 phosphoglucomutase activity; GO:0008973 phosphopentomutase activity; GO:0016301 kinase activity; GO:0016740 transferase activity; GO:0016772 transferase activity, transferring phosphorus-containing groups; GO:0016773 phosphotransferase activity, alcohol group as acceptor; GO:0016853 isomerase activity; GO:0016866 intramolecular transferase activity; GO:00…	PF02878; PF02879; PF02880	PF02878 Phosphoglucomutase/phosphomannomutase, alpha/beta/alpha domain I; PF02879 Phosphoglucomutase/phosphomannomutase, alpha/beta/alpha domain II; PF02880 Phosphoglucomutase/phosphomannomutase, alpha/beta/alpha domain III	G	KOG1220	Phosphoglucomutase/phosphomannomutase
Q99NB1	Acetyl-coenzyme A synthetase 2-like, mitochondrial OS=Mus musculus OX=10090 GN=Acss1 PE=1 SV=1	Acss1	0.590108	0.0181939	Down	6.89	4	4	4	167505	212688	181946	136256	90171.6	105295	1.12437	1.42766	1.2213	0.914611	0.605272	0.706787	mitochondria	K01895	ACSS1_2; acetyl-CoA synthetase [EC:6.2.1.1]	mmu00620 Pyruvate metabolism; mmu01200 Carbon metabolism; mmu00630 Glyoxylate and dicarboxylate metabolism; mmu01100 Metabolic pathways; mmu00640 Propanoate metabolism; mmu00010 Glycolysis / Gluconeogenesis	GO:0006066 alcohol metabolic process; GO:0006067 ethanol metabolic process; GO:0006069 ethanol oxidation; GO:0006082 organic acid metabolic process; GO:0006083 acetate metabolic process; GO:0006084 acetyl-CoA metabolic process; GO:0006085 acetyl-CoA biosynthetic process; GO:0006091 generation of precursor metabolites and energy; GO:0006139 nucleobase-containing compound metabolic process; GO:0006…	GO:0005622 intracellular anatomical structure; GO:0005634 nucleus; GO:0005654 nucleoplasm; GO:0005737 cytoplasm; GO:0005739 mitochondrion; GO:0005759 mitochondrial matrix; GO:0005829 cytosol; GO:0031974 membrane-enclosed lumen; GO:0031981 nuclear lumen; GO:0043226 organelle; GO:0043227 membrane-bounded organelle; GO:0043229 intracellular organelle; GO:0043231 intracellular membrane-bounded organe…	GO:0003824 catalytic activity; GO:0003987 acetate-CoA ligase activity; GO:0016405 CoA-ligase activity; GO:0016874 ligase activity; GO:0016877 ligase activity, forming carbon-sulfur bonds; GO:0016878 acid-thiol ligase activity;	PF13193	PF13193 AMP-binding enzyme C-terminal domain	I	KOG1175	Acyl-CoA synthetase
Q91V04	Translocating chain-associated membrane protein 1 OS=Mus musculus OX=10090 GN=Tram1 PE=1 SV=3	Tram1	0.59134	0.0499753	Down	2.94	1	1	1	188002	246985	200802	146919	103726		1.06044	1.39314	1.13264	0.828708	0.585075		plasma membrane	K14010	TRAM1; translocating chain-associated membrane protein 1	mmu04141 Protein processing in endoplasmic reticulum	GO:0006605 protein targeting; GO:0006612 protein targeting to membrane; GO:0006613 cotranslational protein targeting to membrane; GO:0006614 SRP-dependent cotranslational protein targeting to membrane; GO:0006616 SRP-dependent cotranslational protein targeting to membrane, translocation; GO:0006810 transport; GO:0006886 intracellular protein transport; GO:0006897 endocytosis; GO:0006909 phagocyto…	GO:0005622 intracellular anatomical structure; GO:0005737 cytoplasm; GO:0005783 endoplasmic reticulum; GO:0005789 endoplasmic reticulum membrane; GO:0005791 rough endoplasmic reticulum; GO:0005886 plasma membrane; GO:0012505 endomembrane system; GO:0016020 membrane; GO:0030425 dendrite; GO:0031984 organelle subcompartment; GO:0036477 somatodendritic compartment; GO:0042175 nuclear outer membrane-…	GO:0038023 signaling receptor activity; GO:0060089 molecular transducer activity;	PF03798	PF03798 TLC domain	U	KOG1608	Protein transporter of the TRAM (translocating chain-associating membrane) superfamily
Q9CX30	Protein YIF1B OS=Mus musculus OX=10090 GN=Yif1b PE=1 SV=2	Yif1b	0.591956	0.0376459	Down	4.18	1	1	1	518556	511270	368117	278046	213314	336161	1.39806	1.37842	0.992468	0.749631	0.575109	0.906313	plasma membrane	K20362			GO:0000902 cell morphogenesis; GO:0002790 peptide secretion; GO:0006810 transport; GO:0006888 endoplasmic reticulum to Golgi vesicle-mediated transport; GO:0008104 protein localization; GO:0009306 protein secretion; GO:0009653 anatomical structure morphogenesis; GO:0009987 cellular process; GO:0015031 protein transport; GO:0015833 peptide transport; GO:0016043 cellular component organization; GO:…	GO:0000139 Golgi membrane; GO:0005622 intracellular anatomical structure; GO:0005737 cytoplasm; GO:0005783 endoplasmic reticulum; GO:0005789 endoplasmic reticulum membrane; GO:0005793 endoplasmic reticulum-Golgi intermediate compartment; GO:0005794 Golgi apparatus; GO:0005798 Golgi-associated vesicle; GO:0012505 endomembrane system; GO:0016020 membrane; GO:0030134 COPII-coated ER to Golgi transpo…				S	KOG3094	Predicted membrane protein
Q99LE6	ATP-binding cassette sub-family F member 2 OS=Mus musculus OX=10090 GN=Abcf2 PE=1 SV=1	Abcf2	0.595073	0.0251217	Down	3.18	2	2	2	62454.3	68597	70761.3	48830.7	41840.4	29422.1	1.16409	1.27858	1.31892	0.910155	0.779863	0.548398	nucleus	K06185				GO:0005622 intracellular anatomical structure; GO:0005737 cytoplasm; GO:0005739 mitochondrion; GO:0005740 mitochondrial envelope; GO:0031967 organelle envelope; GO:0031975 envelope; GO:0043226 organelle; GO:0043227 membrane-bounded organelle; GO:0043229 intracellular organelle; GO:0043231 intracellular membrane-bounded organelle;	GO:0000166 nucleotide binding; GO:0005215 transporter activity; GO:0005488 binding; GO:0005524 ATP binding; GO:0017076 purine nucleotide binding; GO:0030554 adenyl nucleotide binding; GO:0032553 ribonucleotide binding; GO:0032555 purine ribonucleotide binding; GO:0032559 adenyl ribonucleotide binding; GO:0035639 purine ribonucleoside triphosphate binding; GO:0036094 small molecule binding; GO:004…	PF00005; PF12848	PF00005 ABC transporter; PF12848 ABC transporter	R	KOG0927	Predicted transporter (ABC superfamily)
Q9JIX8	Apoptotic chromatin condensation inducer in the nucleus OS=Mus musculus OX=10090 GN=Acin1 PE=1 SV=3	Acin1	0.596846	0.0276919	Down	2.62	3	3	3	201050	303871	251210	178665	140841	131788	0.999068	1.51001	1.24833	0.887832	0.699875	0.654888	nucleus	K12875	ACIN1; apoptotic chromatin condensation inducer in the nucleus	mmu03013 Nucleocytoplasmic transport; mmu03015 mRNA surveillance pathway; mmu03040 Spliceosome	GO:0002262 myeloid cell homeostasis; GO:0002376 immune system process; GO:0002520 immune system development; GO:0002682 regulation of immune system process; GO:0002684 positive regulation of immune system process; GO:0002761 regulation of myeloid leukocyte differentiation; GO:0002763 positive regulation of myeloid leukocyte differentiation; GO:0006915 apoptotic process; GO:0006921 cellular compon…	GO:0005622 intracellular anatomical structure; GO:0005634 nucleus; GO:0005654 nucleoplasm; GO:0005730 nucleolus; GO:0005737 cytoplasm; GO:0005829 cytosol; GO:0005886 plasma membrane; GO:0016020 membrane; GO:0016604 nuclear body; GO:0016607 nuclear speck; GO:0031974 membrane-enclosed lumen; GO:0031981 nuclear lumen; GO:0032991 protein-containing complex; GO:0043226 organelle; GO:0043227 membrane-b…	GO:0003676 nucleic acid binding; GO:0003824 catalytic activity; GO:0005488 binding; GO:0005515 protein binding; GO:0016462 pyrophosphatase activity; GO:0016787 hydrolase activity; GO:0016817 hydrolase activity, acting on acid anhydrides; GO:0016818 hydrolase activity, acting on acid anhydrides, in phosphorus-containing anhydrides; GO:0016887 ATP hydrolysis activity; GO:0017111 ribonucleoside trip…	PF02037	PF02037 SAP domain	B	KOG2416	Acinus (induces apoptotic chromatin condensation)
Q921F4	Heterogeneous nuclear ribonucleoprotein L-like OS=Mus musculus OX=10090 GN=Hnrnpll PE=1 SV=3	Hnrnpll	0.598751	0.000842038	Down	1.69	1	1	1	169242	180281	150261	102113	101102	96031.1	1.27086	1.35375	1.12833	0.766777	0.759185	0.721108	cytoplasm	K13159			GO:0000381 regulation of alternative mRNA splicing, via spliceosome; GO:0000902 cell morphogenesis; GO:0006417 regulation of translation; GO:0006935 chemotaxis; GO:0006950 response to stress; GO:0007154 cell communication; GO:0007275 multicellular organism development; GO:0007399 nervous system development; GO:0007409 axonogenesis; GO:0007411 axon guidance; GO:0007610 behavior; GO:0007631 feeding…	GO:0005622 intracellular anatomical structure; GO:0005634 nucleus; GO:0005654 nucleoplasm; GO:0005737 cytoplasm; GO:0005829 cytosol; GO:0031974 membrane-enclosed lumen; GO:0031981 nuclear lumen; GO:0032991 protein-containing complex; GO:0035770 ribonucleoprotein granule; GO:0043226 organelle; GO:0043227 membrane-bounded organelle; GO:0043228 non-membrane-bounded organelle; GO:0043229 intracellula…	GO:0001067 transcription regulatory region nucleic acid binding; GO:0003676 nucleic acid binding; GO:0003677 DNA binding; GO:0003723 RNA binding; GO:0003729 mRNA binding; GO:0003730 mRNA 3'-UTR binding; GO:0005488 binding; GO:0036002 pre-mRNA binding; GO:0097157 pre-mRNA intronic binding; GO:0097159 organic cyclic compound binding; GO:1901363 heterocyclic compound binding; GO:1990715 mRNA CDS bin…	PF00076; PF11835; PF13893	PF00076 RNA recognition motif. (a.k.a. RRM, RBD, or RNP domain); PF11835 RRM-like domain; PF13893 RNA recognition motif. (a.k.a. RRM, RBD, or RNP domain)	A	KOG1456	Heterogeneous nuclear ribonucleoprotein L (contains RRM repeats)
P52912	Cytotoxic granule associated RNA binding protein TIA1 OS=Mus musculus OX=10090 GN=Tia1 PE=1 SV=1	Tia1	0.599898	0.0325162	Down	5.18	2	2	0	168922	209468	264589	151263	113267	121192	0.985254	1.22174	1.54324	0.882256	0.660641	0.706864	nucleus	K13201			GO:0000003 reproduction; GO:0000375 RNA splicing, via transesterification reactions; GO:0000377 RNA splicing, via transesterification reactions with bulged adenosine as nucleophile; GO:0000381 regulation of alternative mRNA splicing, via spliceosome; GO:0000398 mRNA splicing, via spliceosome; GO:0001817 regulation of cytokine production; GO:0001818 negative regulation of cytokine production; GO:0…	GO:0005622 intracellular anatomical structure; GO:0005634 nucleus; GO:0005654 nucleoplasm; GO:0005685 U1 snRNP; GO:0005737 cytoplasm; GO:0005829 cytosol; GO:0010494 cytoplasmic stress granule; GO:0030532 small nuclear ribonucleoprotein complex; GO:0031974 membrane-enclosed lumen; GO:0031981 nuclear lumen; GO:0032991 protein-containing complex; GO:0035770 ribonucleoprotein granule; GO:0036464 cyto…	GO:0003676 nucleic acid binding; GO:0003723 RNA binding; GO:0003727 single-stranded RNA binding; GO:0003729 mRNA binding; GO:0005488 binding; GO:0008143 poly(A) binding; GO:0070717 poly-purine tract binding; GO:0097159 organic cyclic compound binding; GO:1901363 heterocyclic compound binding;	PF00076	PF00076 RNA recognition motif. (a.k.a. RRM, RBD, or RNP domain)	AJ	KOG0148	Apoptosis-promoting RNA-binding protein TIA-1/TIAR (RRM superfamily)
Q7TQK5	Coiled-coil domain-containing protein 93 OS=Mus musculus OX=10090 GN=Ccdc93 PE=1 SV=1	Ccdc93	0.600283	0.0497928	Down	5.25	3	3	3	101783	95923.8	140679	81204.9	50482.1	71440.1	1.12776	1.06284	1.55873	0.899756	0.559345	0.791561	nucleus				GO:0006810 transport; GO:0006892 post-Golgi vesicle-mediated transport; GO:0006893 Golgi to plasma membrane transport; GO:0016192 vesicle-mediated transport; GO:0048193 Golgi vesicle transport; GO:0051179 localization; GO:0051234 establishment of localization; GO:0098876 vesicle-mediated transport to the plasma membrane;	GO:0005622 intracellular anatomical structure; GO:0043226 organelle; GO:0043227 membrane-bounded organelle; GO:0043229 intracellular organelle; GO:0043231 intracellular membrane-bounded organelle;				S	KOG2701	Uncharacterized conserved protein
Q99JX3	Golgi reassembly-stacking protein 2 OS=Mus musculus OX=10090 GN=Gorasp2 PE=1 SV=3	Gorasp2	0.603338	0.0291335	Down	2.22	1	1	1	435604	588073	376345	272573	253258	318855	1.16435	1.57189	1.00595	0.728575	0.676947	0.852285	nucleus	K26797	GORASP; golgi reassembly-stacking protein	mmu04140 Autophagy - animal	GO:0002009 morphogenesis of an epithelium; GO:0002165 instar larval or pupal development; GO:0006996 organelle organization; GO:0007030 Golgi organization; GO:0007275 multicellular organism development; GO:0007444 imaginal disc development; GO:0007472 wing disc morphogenesis; GO:0007476 imaginal disc-derived wing morphogenesis; GO:0007552 metamorphosis; GO:0007560 imaginal disc morphogenesis; GO:…	GO:0000139 Golgi membrane; GO:0005622 intracellular anatomical structure; GO:0005737 cytoplasm; GO:0005783 endoplasmic reticulum; GO:0005794 Golgi apparatus; GO:0005795 Golgi stack; GO:0005797 Golgi medial cisterna; GO:0005798 Golgi-associated vesicle; GO:0005886 plasma membrane; GO:0012505 endomembrane system; GO:0016020 membrane; GO:0031090 organelle membrane; GO:0031410 cytoplasmic vesicle; GO…		PF04495	PF04495 GRASP55/65 PDZ-like domain	U	KOG3834	Golgi reassembly stacking protein GRASP65, contains PDZ domain
Q497K7	Transmembrane protein 247 OS=Mus musculus OX=10090 GN=Tmem247 PE=1 SV=2	Tmem247	0.60498	0.00146366	Down	14.69	3	3	3	444375	400567	428581	233274	253048	284134	1.30444	1.17584	1.25808	0.684764	0.74281	0.834061	plasma membrane					GO:0005622 intracellular anatomical structure; GO:0005737 cytoplasm; GO:0005783 endoplasmic reticulum; GO:0012505 endomembrane system; GO:0043226 organelle; GO:0043227 membrane-bounded organelle; GO:0043229 intracellular organelle; GO:0043231 intracellular membrane-bounded organelle;
Q99NB9	Splicing factor 3B subunit 1 OS=Mus musculus OX=10090 GN=Sf3b1 PE=1 SV=1	Sf3b1	0.605282	0.0349838	Down	7.98	8	8	8	529694	832344	832078	448037	462296	417727	0.90233	1.41789	1.41744	0.763228	0.787518	0.711595	plasma membrane	K12828	SF3B1; splicing factor 3B subunit 1	mmu03040 Spliceosome	GO:0000245 spliceosomal complex assembly; GO:0000375 RNA splicing, via transesterification reactions; GO:0000377 RNA splicing, via transesterification reactions with bulged adenosine as nucleophile; GO:0000398 mRNA splicing, via spliceosome; GO:0001701 in utero embryonic development; GO:0001824 blastocyst development; GO:0001825 blastocyst formation; GO:0003002 regionalization; GO:0006139 nucleob…	GO:0000785 chromatin; GO:0005622 intracellular anatomical structure; GO:0005634 nucleus; GO:0005654 nucleoplasm; GO:0005681 spliceosomal complex; GO:0005684 U2-type spliceosomal complex; GO:0005686 U2 snRNP; GO:0005689 U12-type spliceosomal complex; GO:0005694 chromosome; GO:0016363 nuclear matrix; GO:0016604 nuclear body; GO:0016607 nuclear speck; GO:0030532 small nuclear ribonucleoprotein compl…	GO:0003676 nucleic acid binding; GO:0003682 chromatin binding; GO:0003723 RNA binding; GO:0003729 mRNA binding; GO:0005488 binding; GO:0097159 organic cyclic compound binding; GO:1901363 heterocyclic compound binding;	PF08920	PF08920 Splicing factor 3B subunit 1	A	KOG0213	Splicing factor 3b, subunit 1
Q8BG05	Heterogeneous nuclear ribonucleoprotein A3 OS=Mus musculus OX=10090 GN=Hnrnpa3 PE=1 SV=1	Hnrnpa3	0.607298	0.0232959	Down	18.21	5	5	5	4518080	5286100	5533730	3500890	3453000	2360790	1.09962	1.28654	1.34681	0.852054	0.840399	0.574574	nucleus	K12741	HNRNPA1_3; heterogeneous nuclear ribonucleoprotein A1/A3	mmu03040 Spliceosome; mmu05014 Amyotrophic lateral sclerosis	GO:0000003 reproduction; GO:0000375 RNA splicing, via transesterification reactions; GO:0000377 RNA splicing, via transesterification reactions with bulged adenosine as nucleophile; GO:0000381 regulation of alternative mRNA splicing, via spliceosome; GO:0000398 mRNA splicing, via spliceosome; GO:0001654 eye development; GO:0001745 compound eye morphogenesis; GO:0003006 developmental process invol…	GO:0000781 chromosome, telomeric region; GO:0000785 chromatin; GO:0000792 heterochromatin; GO:0005622 intracellular anatomical structure; GO:0005634 nucleus; GO:0005654 nucleoplasm; GO:0005681 spliceosomal complex; GO:0005694 chromosome; GO:0005700 polytene chromosome; GO:0005703 polytene chromosome puff; GO:0005737 cytoplasm; GO:0016604 nuclear body; GO:0016607 nuclear speck; GO:0031974 membrane…	GO:0003676 nucleic acid binding; GO:0003677 DNA binding; GO:0003723 RNA binding; GO:0003727 single-stranded RNA binding; GO:0003729 mRNA binding; GO:0003730 mRNA 3'-UTR binding; GO:0005215 transporter activity; GO:0005488 binding; GO:0015932 nucleobase-containing compound transmembrane transporter activity; GO:0022857 transmembrane transporter activity; GO:0022884 macromolecule transmembrane tran…	PF00076	PF00076 RNA recognition motif. (a.k.a. RRM, RBD, or RNP domain)	R	KOG0118	FOG: RRM domain
Q8K1H1	Tudor domain-containing protein 7 OS=Mus musculus OX=10090 GN=Tdrd7 PE=1 SV=1	Tdrd7	0.60841	0.0020969	Down	1.75	2	2	2	90093.3	88650	87686.2	49788.8	61878.2	50431.3	1.26143	1.24123	1.22773	0.697114	0.866383	0.70611	cytoplasm	K18405			GO:0000003 reproduction; GO:0000578 embryonic axis specification; GO:0001654 eye development; GO:0002088 lens development in camera-type eye; GO:0002089 lens morphogenesis in camera-type eye; GO:0003002 regionalization; GO:0003006 developmental process involved in reproduction; GO:0006139 nucleobase-containing compound metabolic process; GO:0006725 cellular aromatic compound metabolic process; GO…	GO:0005622 intracellular anatomical structure; GO:0005737 cytoplasm; GO:0005739 mitochondrion; GO:0005759 mitochondrial matrix; GO:0031974 membrane-enclosed lumen; GO:0032991 protein-containing complex; GO:0033391 chromatoid body; GO:0035770 ribonucleoprotein granule; GO:0036464 cytoplasmic ribonucleoprotein granule; GO:0043186 P granule; GO:0043226 organelle; GO:0043227 membrane-bounded organell…	GO:0003676 nucleic acid binding; GO:0003723 RNA binding; GO:0003729 mRNA binding; GO:0005488 binding; GO:0005515 protein binding; GO:0097159 organic cyclic compound binding; GO:1901363 heterocyclic compound binding;	PF12872; PF00567	PF12872 OST-HTH/LOTUS domain; PF00567 Tudor domain	K	KOG2039	Transcriptional coactivator p100
Q9Z2A5	Arginyl-tRNA--protein transferase 1 OS=Mus musculus OX=10090 GN=Ate1 PE=1 SV=2	Ate1	0.609809	0.0367723	Down	5.43	2	2	2	86249.4	85370	96742.8	73521.3	46349	43779.5	1.19788	1.18566	1.34361	1.0211	0.643718	0.608032	cytoplasm,nucleus	K00685			GO:0006508 proteolysis; GO:0006511 ubiquitin-dependent protein catabolic process; GO:0006807 nitrogen compound metabolic process; GO:0008152 metabolic process; GO:0009056 catabolic process; GO:0009057 macromolecule catabolic process; GO:0009987 cellular process; GO:0010498 proteasomal protein catabolic process; GO:0016598 protein arginylation; GO:0019538 protein metabolic process; GO:0019941 modi…	GO:0005622 intracellular anatomical structure; GO:0005634 nucleus; GO:0005737 cytoplasm; GO:0043226 organelle; GO:0043227 membrane-bounded organelle; GO:0043229 intracellular organelle; GO:0043231 intracellular membrane-bounded organelle;	GO:0003824 catalytic activity; GO:0004057 arginyl-tRNA--protein transferase activity; GO:0016740 transferase activity; GO:0016746 acyltransferase activity; GO:0016755 aminoacyltransferase activity; GO:0140096 catalytic activity, acting on a protein;			O	KOG1193	Arginyl-tRNA-protein transferase
Q8VIJ6	Splicing factor, proline- and glutamine-rich OS=Mus musculus OX=10090 GN=Sfpq PE=1 SV=1	Sfpq	0.6129	0.0265533	Down	12.59	6	6	6	772935	942160	966915	594280	630598	418925	1.07208	1.3068	1.34113	0.82428	0.874654	0.581058	nucleus	K13219			GO:0000003 reproduction; GO:0000122 negative regulation of transcription by RNA polymerase II; GO:0000375 RNA splicing, via transesterification reactions; GO:0000377 RNA splicing, via transesterification reactions with bulged adenosine as nucleophile; GO:0000380 alternative mRNA splicing, via spliceosome; GO:0000398 mRNA splicing, via spliceosome; GO:0000724 double-strand break repair via homolog…	GO:0000785 chromatin; GO:0001650 fibrillar center; GO:0005622 intracellular anatomical structure; GO:0005634 nucleus; GO:0005654 nucleoplasm; GO:0005667 transcription regulator complex; GO:0005681 spliceosomal complex; GO:0005694 chromosome; GO:0005730 nucleolus; GO:0016363 nuclear matrix; GO:0016604 nuclear body; GO:0031974 membrane-enclosed lumen; GO:0031981 nuclear lumen; GO:0032991 protein-co…	GO:0000976 transcription cis-regulatory region binding; GO:0000977 RNA polymerase II transcription regulatory region sequence-specific DNA binding; GO:0000978 RNA polymerase II cis-regulatory region sequence-specific DNA binding; GO:0000981 DNA-binding transcription factor activity, RNA polymerase II-specific; GO:0000987 cis-regulatory region sequence-specific DNA binding; GO:0001067 transcriptio…	PF00076; PF08075	PF00076 RNA recognition motif. (a.k.a. RRM, RBD, or RNP domain); PF08075 NOPS (NUC059) domain	A	KOG0115	RNA-binding protein p54nrb (RRM superfamily)
Q9D2C7	Bax inhibitor 1 OS=Mus musculus OX=10090 GN=Tmbim6 PE=1 SV=1	Tmbim6	0.614542	0.0261964	Down	5.49	1	1	1	141600	149120	108113	98757	71846.7	74496	1.31939	1.38946	1.00737	0.920192	0.669449	0.694135	plasma membrane	K21889			GO:0000003 reproduction; GO:0000122 negative regulation of transcription by RNA polymerase II; GO:0001101 response to acid chemical; GO:0002165 instar larval or pupal development; GO:0002637 regulation of immunoglobulin production; GO:0002638 negative regulation of immunoglobulin production; GO:0002682 regulation of immune system process; GO:0002683 negative regulation of immune system process; G…	GO:0005622 intracellular anatomical structure; GO:0005634 nucleus; GO:0005737 cytoplasm; GO:0005739 mitochondrion; GO:0005740 mitochondrial envelope; GO:0005783 endoplasmic reticulum; GO:0005789 endoplasmic reticulum membrane; GO:0005886 plasma membrane; GO:0012505 endomembrane system; GO:0016020 membrane; GO:0031090 organelle membrane; GO:0031966 mitochondrial membrane; GO:0031967 organelle enve…	GO:0004857 enzyme inhibitor activity; GO:0005488 binding; GO:0005515 protein binding; GO:0008428 ribonuclease inhibitor activity; GO:0019899 enzyme binding; GO:0030234 enzyme regulator activity; GO:0031625 ubiquitin protein ligase binding; GO:0044389 ubiquitin-like protein ligase binding; GO:0060698 endoribonuclease inhibitor activity; GO:0098772 molecular function regulator activity;			V	KOG1629	Bax-mediated apoptosis inhibitor TEGT/BI-1
O88379	Bromodomain adjacent to zinc finger domain protein 1A OS=Mus musculus OX=10090 GN=Baz1a PE=1 SV=3	Baz1a	0.615592	0.0247792	Down	0.58	1	1	1		97024.7	91120.4	60860.4		54960.3		1.27678	1.19909	0.800885		0.723243	nucleus	K11655	BAZ1A; bromodomain adjacent to zinc finger domain protein 1A	mmu03082 ATP-dependent chromatin remodeling	GO:0006139 nucleobase-containing compound metabolic process; GO:0006259 DNA metabolic process; GO:0006260 DNA replication; GO:0006261 DNA-templated DNA replication; GO:0006325 chromatin organization; GO:0006334 nucleosome assembly; GO:0006338 chromatin remodeling; GO:0006355 regulation of DNA-templated transcription; GO:0006357 regulation of transcription by RNA polymerase II; GO:0006725 cellular…	GO:0000228 nuclear chromosome; GO:0000785 chromatin; GO:0005622 intracellular anatomical structure; GO:0005634 nucleus; GO:0005694 chromosome; GO:0008623 CHRAC; GO:0016590 ACF complex; GO:0031010 ISWI-type complex; GO:0031974 membrane-enclosed lumen; GO:0031981 nuclear lumen; GO:0032991 protein-containing complex; GO:0043226 organelle; GO:0043227 membrane-bounded organelle; GO:0043228 non-membran…	GO:0003676 nucleic acid binding; GO:0003677 DNA binding; GO:0003824 catalytic activity; GO:0005488 binding; GO:0005515 protein binding; GO:0016462 pyrophosphatase activity; GO:0016787 hydrolase activity; GO:0016817 hydrolase activity, acting on acid anhydrides; GO:0016818 hydrolase activity, acting on acid anhydrides, in phosphorus-containing anhydrides; GO:0016887 ATP hydrolysis activity; GO:001…	PF10537; PF00628; PF00439	PF10537 ATP-utilising chromatin assembly and remodelling N-terminal; PF00628 PHD-finger; PF00439 Bromodomain	B	KOG1245	Chromatin remodeling complex WSTF-ISWI, large subunit (contains heterochromatin localization, PHD and BROMO domains)
Q9Z0G9	Claudin-3 OS=Mus musculus OX=10090 GN=Cldn3 PE=1 SV=1	Cldn3	0.615756	0.0138203	Down	6.39	1	1	1	400508	542092	393756	264254	299890	258725	1.11292	1.50635	1.09416	0.734302	0.833327	0.718939	plasma membrane	K06087	CLDN; claudin	mmu04670 Leukocyte transendothelial migration; mmu05160 Hepatitis C; mmu04514 Cell adhesion molecules; mmu04530 Tight junction	GO:0000902 cell morphogenesis; GO:0001666 response to hypoxia; GO:0002064 epithelial cell development; GO:0003382 epithelial cell morphogenesis; GO:0006950 response to stress; GO:0007043 cell-cell junction assembly; GO:0007154 cell communication; GO:0007155 cell adhesion; GO:0007165 signal transduction; GO:0009628 response to abiotic stimulus; GO:0009636 response to toxic substance; GO:0009653 an…	GO:0005622 intracellular anatomical structure; GO:0005737 cytoplasm; GO:0005886 plasma membrane; GO:0005911 cell-cell junction; GO:0005923 bicellular tight junction; GO:0016020 membrane; GO:0016327 apicolateral plasma membrane; GO:0016328 lateral plasma membrane; GO:0030054 cell junction; GO:0043296 apical junction complex; GO:0070160 tight junction; GO:0071944 cell periphery; GO:0098590 plasma m…	GO:0004888 transmembrane signaling receptor activity; GO:0005488 binding; GO:0005515 protein binding; GO:0038023 signaling receptor activity; GO:0042802 identical protein binding; GO:0060089 molecular transducer activity;
Q07235	Glia-derived nexin OS=Mus musculus OX=10090 GN=Serpine2 PE=1 SV=2	Serpine2	0.618101	0.0137133	Down	16.88	7	7	7	2186180	2327870	3127480	1526540	1578610	1618090	1.06084	1.1296	1.51761	0.740753	0.76602	0.785178	extracellular	K16643	SERPINE2; glia-derived nexin	mmu04610 Complement and coagulation cascades	GO:0000003 reproduction; GO:0001558 regulation of cell growth; GO:0002028 regulation of sodium ion transport; GO:0003006 developmental process involved in reproduction; GO:0003008 system process; GO:0006810 transport; GO:0006950 response to stress; GO:0006996 organelle organization; GO:0007162 negative regulation of cell adhesion; GO:0007275 multicellular organism development; GO:0007320 insemina…	GO:0005576 extracellular region; GO:0005615 extracellular space; GO:0005622 intracellular anatomical structure; GO:0005737 cytoplasm; GO:0005829 cytosol; GO:0005886 plasma membrane; GO:0009897 external side of plasma membrane; GO:0009986 cell surface; GO:0012505 endomembrane system; GO:0016020 membrane; GO:0019897 extrinsic component of plasma membrane; GO:0019898 extrinsic component of membrane;…	GO:0004857 enzyme inhibitor activity; GO:0004866 endopeptidase inhibitor activity; GO:0004867 serine-type endopeptidase inhibitor activity; GO:0005102 signaling receptor binding; GO:0005488 binding; GO:0005515 protein binding; GO:0005539 glycosaminoglycan binding; GO:0008201 heparin binding; GO:0030234 enzyme regulator activity; GO:0030414 peptidase inhibitor activity; GO:0043167 ion binding; GO:…	PF00079	PF00079 Serpin (serine protease inhibitor)	V	KOG2392	Serpin
Q9Z1X4	Interleukin enhancer-binding factor 3 OS=Mus musculus OX=10090 GN=Ilf3 PE=1 SV=2	Ilf3	0.620466	0.022545	Down	4.9	4	4	4	299354	402241	449747	240805	254076	219487	0.962703	1.29358	1.44636	0.774413	0.817092	0.705856	nucleus	K13090			GO:0006355 regulation of DNA-templated transcription; GO:0006417 regulation of translation; GO:0006468 protein phosphorylation; GO:0006479 protein methylation; GO:0006793 phosphorus metabolic process; GO:0006796 phosphate-containing compound metabolic process; GO:0006807 nitrogen compound metabolic process; GO:0008152 metabolic process; GO:0008213 protein alkylation; GO:0009889 regulation of bios…	GO:0005622 intracellular anatomical structure; GO:0005634 nucleus; GO:0005654 nucleoplasm; GO:0005730 nucleolus; GO:0005737 cytoplasm; GO:0005739 mitochondrion; GO:0031974 membrane-enclosed lumen; GO:0031981 nuclear lumen; GO:0032991 protein-containing complex; GO:0043226 organelle; GO:0043227 membrane-bounded organelle; GO:0043228 non-membrane-bounded organelle; GO:0043229 intracellular organell…	GO:0003676 nucleic acid binding; GO:0003677 DNA binding; GO:0003700 DNA-binding transcription factor activity; GO:0003723 RNA binding; GO:0003725 double-stranded RNA binding; GO:0005488 binding; GO:0005515 protein binding; GO:0019899 enzyme binding; GO:0097159 organic cyclic compound binding; GO:0140110 transcription regulator activity; GO:1901363 heterocyclic compound binding;	PF07528; PF00035	PF07528 DZF domain; PF00035 Double-stranded RNA binding motif	R	KOG3792	Transcription factor NFAT, subunit NF90
Q9D883	Splicing factor U2AF 35 kDa subunit OS=Mus musculus OX=10090 GN=U2af1 PE=1 SV=4	U2af1	0.620871	0.020763	Down	9.62	2	2	2	335077	294928	348972	251282	190597	165939	1.267	1.11518	1.31954	0.950149	0.720687	0.62745	nucleus	K12836	U2AF1; splicing factor U2AF 35 kDa subunit	mmu03040 Spliceosome	GO:0000375 RNA splicing, via transesterification reactions; GO:0000377 RNA splicing, via transesterification reactions with bulged adenosine as nucleophile; GO:0000381 regulation of alternative mRNA splicing, via spliceosome; GO:0000398 mRNA splicing, via spliceosome; GO:0006139 nucleobase-containing compound metabolic process; GO:0006396 RNA processing; GO:0006397 mRNA processing; GO:0006403 RNA…	GO:0005622 intracellular anatomical structure; GO:0005634 nucleus; GO:0005654 nucleoplasm; GO:0005681 spliceosomal complex; GO:0015030 Cajal body; GO:0016604 nuclear body; GO:0016607 nuclear speck; GO:0031974 membrane-enclosed lumen; GO:0031981 nuclear lumen; GO:0032991 protein-containing complex; GO:0043226 organelle; GO:0043227 membrane-bounded organelle; GO:0043229 intracellular organelle; GO:…	GO:0003676 nucleic acid binding; GO:0003723 RNA binding; GO:0003727 single-stranded RNA binding; GO:0003729 mRNA binding; GO:0005488 binding; GO:0005515 protein binding; GO:0008187 poly-pyrimidine tract binding; GO:0019904 protein domain specific binding; GO:0030628 pre-mRNA 3'-splice site binding; GO:0036002 pre-mRNA binding; GO:0050733 RS domain binding; GO:0097159 organic cyclic compound bindi…	PF00076	PF00076 RNA recognition motif. (a.k.a. RRM, RBD, or RNP domain)	A	KOG2202	U2 snRNP splicing factor, small subunit, and related proteins
Q9WVL1	AP-4 complex subunit sigma-1 OS=Mus musculus OX=10090 GN=Ap4s1 PE=2 SV=1	Ap4s1	0.621363	0.00695716	Down	6.94	1	1	1	79742	81964.4	87162.6	45191.5	61048	48398.4	1.18573	1.21878	1.29608	0.671981	0.907761	0.719667	cytoplasm	K12403	AP4S1; AP-4 complex subunit sigma-1	mmu04142 Lysosome	GO:0006605 protein targeting; GO:0006810 transport; GO:0006886 intracellular protein transport; GO:0008104 protein localization; GO:0015031 protein transport; GO:0015833 peptide transport; GO:0016192 vesicle-mediated transport; GO:0033036 macromolecule localization; GO:0042886 amide transport; GO:0045184 establishment of protein localization; GO:0046907 intracellular transport; GO:0051179 localiz…	GO:0000139 Golgi membrane; GO:0005622 intracellular anatomical structure; GO:0005737 cytoplasm; GO:0005768 endosome; GO:0005794 Golgi apparatus; GO:0005802 trans-Golgi network; GO:0012505 endomembrane system; GO:0016020 membrane; GO:0030117 membrane coat; GO:0030119 AP-type membrane coat adaptor complex; GO:0030124 AP-4 adaptor complex; GO:0031090 organelle membrane; GO:0031410 cytoplasmic vesicl…		PF01217	PF01217 Clathrin adaptor complex small chain	U	KOG0934	Clathrin adaptor complex, small subunit
Q8VEB4	Phospholipase A2 group XV OS=Mus musculus OX=10090 GN=Pla2g15 PE=1 SV=1	Pla2g15	0.621382	0.0335048	Down	7.04	2	2	2	38790.8	35838.1	53480.3	28508.7	22427.1	28669	1.12051	1.03521	1.54483	0.823499	0.647826	0.828129	extracellular	K06129	LYPLA3; lysophospholipase III [EC:3.1.1.5]	mmu04142 Lysosome; mmu04148 Efferocytosis; mmu00564 Glycerophospholipid metabolism	GO:0006082 organic acid metabolic process; GO:0006629 lipid metabolic process; GO:0006631 fatty acid metabolic process; GO:0006643 membrane lipid metabolic process; GO:0006644 phospholipid metabolic process; GO:0006650 glycerophospholipid metabolic process; GO:0006665 sphingolipid metabolic process; GO:0006672 ceramide metabolic process; GO:0006793 phosphorus metabolic process; GO:0006796 phospha…	GO:0000323 lytic vacuole; GO:0005576 extracellular region; GO:0005615 extracellular space; GO:0005622 intracellular anatomical structure; GO:0005634 nucleus; GO:0005654 nucleoplasm; GO:0005737 cytoplasm; GO:0005764 lysosome; GO:0005773 vacuole; GO:0031974 membrane-enclosed lumen; GO:0031981 nuclear lumen; GO:0043226 organelle; GO:0043227 membrane-bounded organelle; GO:0043229 intracellular organe…	GO:0003824 catalytic activity; GO:0004620 phospholipase activity; GO:0004622 lysophospholipase activity; GO:0004623 phospholipase A2 activity; GO:0005488 binding; GO:0005543 phospholipid binding; GO:0008289 lipid binding; GO:0008374 O-acyltransferase activity; GO:0016298 lipase activity; GO:0016740 transferase activity; GO:0016746 acyltransferase activity; GO:0016747 acyltransferase activity, tra…			I	KOG2369	Lecithin:cholesterol acyltransferase (LCAT)/Acyl-ceramide synthase
P30658	Chromobox protein homolog 2 OS=Mus musculus OX=10090 GN=Cbx2 PE=1 SV=2	Cbx2	0.623172	0.0251551	Down	1.93	1	1	1	419692	359996	534375	272235	241801	304851	1.1806	1.01267	1.5032	0.765799	0.680188	0.857548	nucleus	K11451	CBX2; chromobox protein 2	mmu03083 Polycomb repressive complex	GO:0000003 reproduction; GO:0000122 negative regulation of transcription by RNA polymerase II; GO:0003006 developmental process involved in reproduction; GO:0006355 regulation of DNA-templated transcription; GO:0006357 regulation of transcription by RNA polymerase II; GO:0007275 multicellular organism development; GO:0007548 sex differentiation; GO:0009889 regulation of biosynthetic process; GO:0…	GO:0000151 ubiquitin ligase complex; GO:0000152 nuclear ubiquitin ligase complex; GO:0000785 chromatin; GO:0000791 euchromatin; GO:0000792 heterochromatin; GO:0005622 intracellular anatomical structure; GO:0005634 nucleus; GO:0005654 nucleoplasm; GO:0005694 chromosome; GO:0031519 PcG protein complex; GO:0031974 membrane-enclosed lumen; GO:0031981 nuclear lumen; GO:0032991 protein-containing compl…	GO:0003682 chromatin binding; GO:0005488 binding; GO:0005515 protein binding; GO:0035064 methylated histone binding; GO:0042393 histone binding; GO:0140030 modification-dependent protein binding; GO:0140034 methylation-dependent protein binding;	PF00385	PF00385 Chromo (CHRromatin Organisation MOdifier) domain	B	KOG2748	Uncharacterized conserved protein, contains chromo domain
Q9CWS4	Integrator complex subunit 11 OS=Mus musculus OX=10090 GN=Ints11 PE=1 SV=1	Ints11	0.624263	0.0310146	Down	2	1	1	1	72886.3	95162.7	93935.5	51166.6	57864.8		0.982253	1.28246	1.26592	0.689547	0.779816		cytoplasm	K13148			GO:0006139 nucleobase-containing compound metabolic process; GO:0006351 DNA-templated transcription; GO:0006366 transcription by RNA polymerase II; GO:0006378 mRNA polyadenylation; GO:0006396 RNA processing; GO:0006397 mRNA processing; GO:0006725 cellular aromatic compound metabolic process; GO:0006807 nitrogen compound metabolic process; GO:0008152 metabolic process; GO:0009058 biosynthetic proc…	GO:0000428 DNA-directed RNA polymerase complex; GO:0005622 intracellular anatomical structure; GO:0005634 nucleus; GO:0005654 nucleoplasm; GO:0005737 cytoplasm; GO:0005829 cytosol; GO:0005847 mRNA cleavage and polyadenylation specificity factor complex; GO:0005849 mRNA cleavage factor complex; GO:0016591 RNA polymerase II, holoenzyme; GO:0030880 RNA polymerase complex; GO:0031974 membrane-enclose…		PF16661; PF10996	PF16661 Metallo-beta-lactamase superfamily domain; PF10996 Beta-Casp domain	A	KOG1136	Predicted cleavage and polyadenylation specificity factor (CPSF subunit)
Q61263	Sterol O-acyltransferase 1 OS=Mus musculus OX=10090 GN=Soat1 PE=1 SV=2	Soat1	0.624985	0.0244187	Down	2.78	1	1	1	64337.3	94376	88833.1	53786.1	46224.1	54702.7	0.959639	1.40769	1.32501	0.80226	0.689467	0.815932	plasma membrane	K00637	SOAT; sterol O-acyltransferase [EC:2.3.1.26]	mmu00100 Steroid biosynthesis; mmu04979 Cholesterol metabolism	GO:0006066 alcohol metabolic process; GO:0006629 lipid metabolic process; GO:0006810 transport; GO:0006869 lipid transport; GO:0008152 metabolic process; GO:0008202 steroid metabolic process; GO:0008203 cholesterol metabolic process; GO:0009889 regulation of biosynthetic process; GO:0009891 positive regulation of biosynthetic process; GO:0009893 positive regulation of metabolic process; GO:000998…	GO:0005622 intracellular anatomical structure; GO:0005737 cytoplasm; GO:0005783 endoplasmic reticulum; GO:0005789 endoplasmic reticulum membrane; GO:0005903 brush border; GO:0012505 endomembrane system; GO:0016020 membrane; GO:0031984 organelle subcompartment; GO:0042175 nuclear outer membrane-endoplasmic reticulum membrane network; GO:0043226 organelle; GO:0043227 membrane-bounded organelle; GO:…	GO:0000062 fatty-acyl-CoA binding; GO:0000166 nucleotide binding; GO:0003824 catalytic activity; GO:0004772 sterol O-acyltransferase activity; GO:0005488 binding; GO:0005496 steroid binding; GO:0008289 lipid binding; GO:0008374 O-acyltransferase activity; GO:0015485 cholesterol binding; GO:0016740 transferase activity; GO:0016746 acyltransferase activity; GO:0016747 acyltransferase activity, tran…			I	KOG0380	Sterol O-acyltransferase/Diacylglycerol O-acyltransferase
P63328	Protein phosphatase 3 catalytic subunit alpha OS=Mus musculus OX=10090 GN=Ppp3ca PE=1 SV=1	Ppp3ca	0.625285	0.0275816	Down	8.06	4	2	2	552559	526148	793102	368227	387921	414266	1.08978	1.03769	1.56419	0.726233	0.765074	0.817033	cytoplasm	K04348	PPP3C; serine/threonine-protein phosphatase 2B catalytic subunit [EC:3.1.3.16]	mmu04370 VEGF signaling pathway; mmu04218 Cellular senescence; mmu04658 Th1 and Th2 cell differentiation; mmu05417 Lipid and atherosclerosis; mmu04020 Calcium signaling pathway; mmu04924 Renin secretion; mmu05163 Human cytomegalovirus infection; mmu04022 cGMP-PKG signaling pathway; mmu05170 Human immunodeficiency virus 1 infection; mmu04310 Wnt signaling pathway; mmu05031 Amphetamine addiction; m…	GO:0000082 G1/S transition of mitotic cell cycle; GO:0000278 mitotic cell cycle; GO:0001678 intracellular glucose homeostasis; GO:0001775 cell activation; GO:0001975 response to amphetamine; GO:0002376 immune system process; GO:0002682 regulation of immune system process; GO:0002764 immune response-regulating signaling pathway; GO:0002768 immune response-regulating cell surface receptor signaling…	GO:0005622 intracellular anatomical structure; GO:0005634 nucleus; GO:0005654 nucleoplasm; GO:0005737 cytoplasm; GO:0005739 mitochondrion; GO:0005829 cytosol; GO:0005955 calcineurin complex; GO:0008287 protein serine/threonine phosphatase complex; GO:0016020 membrane; GO:0030016 myofibril; GO:0030017 sarcomere; GO:0030018 Z disc; GO:0030425 dendrite; GO:0031674 I band; GO:0031974 membrane-enclose…	GO:0003824 catalytic activity; GO:0004721 phosphoprotein phosphatase activity; GO:0004722 protein serine/threonine phosphatase activity; GO:0004723 calcium-dependent protein serine/threonine phosphatase activity; GO:0005488 binding; GO:0005509 calcium ion binding; GO:0005515 protein binding; GO:0005516 calmodulin binding; GO:0016018 cyclosporin A binding; GO:0016787 hydrolase activity; GO:0016788…	PF00149	PF00149 Calcineurin-like phosphoesterase	R	KOG0375	Serine-threonine phosphatase 2B, catalytic subunit
Q9EPS3	D-glucuronyl C5-epimerase OS=Mus musculus OX=10090 GN=Glce PE=1 SV=2	Glce	0.625665	0.035967	Down	5.18	3	3	3	85386.9	94373.9	126582	74596.2	62555.6	54516.2	1.02874	1.13701	1.52505	0.89873	0.753666	0.656807	Golgi apparatus	K01793	GLCE; heparosan-N-sulfate-glucuronate 5-epimerase [EC:5.1.3.17]	mmu01100 Metabolic pathways; mmu00534 Glycosaminoglycan biosynthesis - heparan sulfate / heparin	GO:0006022 aminoglycan metabolic process; GO:0006023 aminoglycan biosynthetic process; GO:0006024 glycosaminoglycan biosynthetic process; GO:0006029 proteoglycan metabolic process; GO:0006082 organic acid metabolic process; GO:0006790 sulfur compound metabolic process; GO:0006807 nitrogen compound metabolic process; GO:0008152 metabolic process; GO:0009058 biosynthetic process; GO:0009059 macromo…	GO:0000139 Golgi membrane; GO:0005622 intracellular anatomical structure; GO:0005737 cytoplasm; GO:0005794 Golgi apparatus; GO:0012505 endomembrane system; GO:0016020 membrane; GO:0031090 organelle membrane; GO:0031984 organelle subcompartment; GO:0043226 organelle; GO:0043227 membrane-bounded organelle; GO:0043229 intracellular organelle; GO:0043231 intracellular membrane-bounded organelle; GO:0…	GO:0003824 catalytic activity; GO:0005488 binding; GO:0005515 protein binding; GO:0016853 isomerase activity; GO:0016854 racemase and epimerase activity; GO:0016857 racemase and epimerase activity, acting on carbohydrates and derivatives; GO:0042802 identical protein binding; GO:0042803 protein homodimerization activity; GO:0046983 protein dimerization activity; GO:0047464 heparosan-N-sulfate-glu…			G	KOG3760	Heparan sulfate-glucuronic acid C5-epimerase
Q9R0I7	YLP motif-containing protein 1 OS=Mus musculus OX=10090 GN=Ylpm1 PE=2 SV=2	Ylpm1	0.625812	0.0101402	Down	1.8	2	2	2	51656.1	69006.3	55292.1	40455.9	35362	34296.6	1.08343	1.44734	1.15969	0.84852	0.741681	0.719336	nucleus	K17602			GO:0000122 negative regulation of transcription by RNA polymerase II; GO:0006355 regulation of DNA-templated transcription; GO:0006357 regulation of transcription by RNA polymerase II; GO:0009889 regulation of biosynthetic process; GO:0009890 negative regulation of biosynthetic process; GO:0009892 negative regulation of metabolic process; GO:0010468 regulation of gene expression; GO:0010556 regul…	GO:0005622 intracellular anatomical structure; GO:0005634 nucleus; GO:0005654 nucleoplasm; GO:0005737 cytoplasm; GO:0005829 cytosol; GO:0016604 nuclear body; GO:0016607 nuclear speck; GO:0031974 membrane-enclosed lumen; GO:0031981 nuclear lumen; GO:0043226 organelle; GO:0043227 membrane-bounded organelle; GO:0043229 intracellular organelle; GO:0043231 intracellular membrane-bounded organelle; GO:…	GO:0000981 DNA-binding transcription factor activity, RNA polymerase II-specific; GO:0001227 DNA-binding transcription repressor activity, RNA polymerase II-specific; GO:0003700 DNA-binding transcription factor activity; GO:0005488 binding; GO:0005515 protein binding; GO:0008157 protein phosphatase 1 binding; GO:0019899 enzyme binding; GO:0019902 phosphatase binding; GO:0019903 protein phosphatas…	PF13671	PF13671 AAA domain	V	KOG2400	Nuclear protein ZAP
Q8VH51	RNA-binding protein 39 OS=Mus musculus OX=10090 GN=Rbm39 PE=1 SV=2	Rbm39	0.628465	0.0144679	Down	7.17	3	3	3	96554.6	140442	118408	72104.5	76487.7	74767.1	1.00097	1.45595	1.22753	0.747502	0.792942	0.775105	nucleus	K13091			GO:0000375 RNA splicing, via transesterification reactions; GO:0000377 RNA splicing, via transesterification reactions with bulged adenosine as nucleophile; GO:0000381 regulation of alternative mRNA splicing, via spliceosome; GO:0000398 mRNA splicing, via spliceosome; GO:0006139 nucleobase-containing compound metabolic process; GO:0006351 DNA-templated transcription; GO:0006396 RNA processing; GO…	GO:0005622 intracellular anatomical structure; GO:0005634 nucleus; GO:0005654 nucleoplasm; GO:0005815 microtubule organizing center; GO:0005856 cytoskeleton; GO:0015630 microtubule cytoskeleton; GO:0016604 nuclear body; GO:0016607 nuclear speck; GO:0031974 membrane-enclosed lumen; GO:0031981 nuclear lumen; GO:0032991 protein-containing complex; GO:0043226 organelle; GO:0043227 membrane-bounded or…	GO:0003676 nucleic acid binding; GO:0003712 transcription coregulator activity; GO:0003713 transcription coactivator activity; GO:0003723 RNA binding; GO:0003729 mRNA binding; GO:0005488 binding; GO:0097159 organic cyclic compound binding; GO:0140110 transcription regulator activity; GO:1901363 heterocyclic compound binding;	PF00076; PF15519	PF00076 RNA recognition motif. (a.k.a. RRM, RBD, or RNP domain); PF15519 linker between RRM2 and RRM3 domains in RBM39 protein	K	KOG0147	Transcriptional coactivator CAPER (RRM superfamily)
Q01320	DNA topoisomerase 2-alpha OS=Mus musculus OX=10090 GN=Top2a PE=1 SV=2	Top2a	0.628648	0.0199122	Down	4.38	6	6	6	230332	313181	230488	178948	142587	165039	1.09632	1.49066	1.09706	0.851745	0.678676	0.785542	nucleus	K03164	TOP2; DNA topoisomerase II [EC:5.6.2.2]	mmu01524 Platinum drug resistance	GO:0000003 reproduction; GO:0000070 mitotic sister chromatid segregation; GO:0000075 cell cycle checkpoint signaling; GO:0000278 mitotic cell cycle; GO:0000280 nuclear division; GO:0000302 response to reactive oxygen species; GO:0000712 resolution of meiotic recombination intermediates; GO:0000819 sister chromatid segregation; GO:0000902 cell morphogenesis; GO:0001764 neuron migration; GO:0002244…	GO:0000228 nuclear chromosome; GO:0000785 chromatin; GO:0000792 heterochromatin; GO:0000793 condensed chromosome; GO:0005622 intracellular anatomical structure; GO:0005634 nucleus; GO:0005654 nucleoplasm; GO:0005694 chromosome; GO:0005730 nucleolus; GO:0005737 cytoplasm; GO:0005829 cytosol; GO:0008623 CHRAC; GO:0009330 DNA topoisomerase type II (double strand cut, ATP-hydrolyzing) complex; GO:003…	GO:0000166 nucleotide binding; GO:0000182 rDNA binding; GO:0000217 DNA secondary structure binding; GO:0000287 magnesium ion binding; GO:0000400 four-way junction DNA binding; GO:0003676 nucleic acid binding; GO:0003677 DNA binding; GO:0003682 chromatin binding; GO:0003690 double-stranded DNA binding; GO:0003696 satellite DNA binding; GO:0003723 RNA binding; GO:0003729 mRNA binding; GO:0003824 ca…	PF02518; PF00204	PF02518 Histidine kinase-, DNA gyrase B-, and HSP90-like ATPase; PF00204 DNA gyrase B	B	KOG0355	DNA topoisomerase type II
Q99K48	Non-POU domain-containing octamer-binding protein OS=Mus musculus OX=10090 GN=Nono PE=1 SV=3	Nono	0.62869	0.0335445	Down	6.98	3	3	3	268533	353224	309771	225960	209686	149996	1.06198	1.39691	1.22506	0.893611	0.829252	0.593194	nucleus	K13214			GO:0000003 reproduction; GO:0000122 negative regulation of transcription by RNA polymerase II; GO:0000375 RNA splicing, via transesterification reactions; GO:0000377 RNA splicing, via transesterification reactions with bulged adenosine as nucleophile; GO:0000380 alternative mRNA splicing, via spliceosome; GO:0000398 mRNA splicing, via spliceosome; GO:0000724 double-strand break repair via homolog…	GO:0000785 chromatin; GO:0001650 fibrillar center; GO:0005622 intracellular anatomical structure; GO:0005634 nucleus; GO:0005654 nucleoplasm; GO:0005667 transcription regulator complex; GO:0005681 spliceosomal complex; GO:0005694 chromosome; GO:0005730 nucleolus; GO:0016363 nuclear matrix; GO:0016604 nuclear body; GO:0016607 nuclear speck; GO:0031974 membrane-enclosed lumen; GO:0031981 nuclear lu…	GO:0000976 transcription cis-regulatory region binding; GO:0000977 RNA polymerase II transcription regulatory region sequence-specific DNA binding; GO:0000978 RNA polymerase II cis-regulatory region sequence-specific DNA binding; GO:0000981 DNA-binding transcription factor activity, RNA polymerase II-specific; GO:0000987 cis-regulatory region sequence-specific DNA binding; GO:0001067 transcriptio…	PF00076; PF08075	PF00076 RNA recognition motif. (a.k.a. RRM, RBD, or RNP domain); PF08075 NOPS (NUC059) domain	A	KOG0115	RNA-binding protein p54nrb (RRM superfamily)
Q8BU85	Methionine-R-sulfoxide reductase B3, mitochondrial OS=Mus musculus OX=10090 GN=Msrb3 PE=1 SV=2	Msrb3	0.628906	0.0226477	Down	3.56	1	1	1	180201	184056	164907	130948	85201.2	116645	1.25436	1.28119	1.1479	0.911515	0.593077	0.811954	plasma membrane	K07305			GO:0006807 nitrogen compound metabolic process; GO:0008152 metabolic process; GO:0009987 cellular process; GO:0019538 protein metabolic process; GO:0030091 protein repair; GO:0043170 macromolecule metabolic process; GO:0044237 cellular metabolic process; GO:0044238 primary metabolic process; GO:0071704 organic substance metabolic process; GO:1901564 organonitrogen compound metabolic process;	GO:0005622 intracellular anatomical structure; GO:0005737 cytoplasm; GO:0005739 mitochondrion; GO:0005783 endoplasmic reticulum; GO:0012505 endomembrane system; GO:0043226 organelle; GO:0043227 membrane-bounded organelle; GO:0043229 intracellular organelle; GO:0043231 intracellular membrane-bounded organelle;	GO:0003824 catalytic activity; GO:0005488 binding; GO:0008270 zinc ion binding; GO:0016491 oxidoreductase activity; GO:0016667 oxidoreductase activity, acting on a sulfur group of donors; GO:0016671 oxidoreductase activity, acting on a sulfur group of donors, disulfide as acceptor; GO:0033743 peptide-methionine (R)-S-oxide reductase activity; GO:0043167 ion binding; GO:0043169 cation binding; GO:…			O	KOG0856	Predicted pilin-like transcription factor
O70165	Ficolin-1 OS=Mus musculus OX=10090 GN=Fcn1 PE=1 SV=1	Fcn1	0.629375	0.0433413	Down	2.69	1	1	1	51024.4	69484.1	69495.3	41782.5	31007.9	46793.3	0.988885	1.34665	1.34686	0.809771	0.600953	0.906884	extracellular	K10104			GO:0001817 regulation of cytokine production; GO:0001819 positive regulation of cytokine production; GO:0001867 complement activation, lectin pathway; GO:0002218 activation of innate immune response; GO:0002220 innate immune response activating cell surface receptor signaling pathway; GO:0002221 pattern recognition receptor signaling pathway; GO:0002252 immune effector process; GO:0002253 activat…	GO:0005576 extracellular region; GO:0005886 plasma membrane; GO:0009897 external side of plasma membrane; GO:0009986 cell surface; GO:0016020 membrane; GO:0019897 extrinsic component of plasma membrane; GO:0019898 extrinsic component of membrane; GO:0031232 extrinsic component of external side of plasma membrane; GO:0071944 cell periphery; GO:0098552 side of membrane;	GO:0001664 G protein-coupled receptor binding; GO:0005102 signaling receptor binding; GO:0005488 binding; GO:0005515 protein binding; GO:0031406 carboxylic acid binding; GO:0033691 sialic acid binding; GO:0036094 small molecule binding; GO:0038023 signaling receptor activity; GO:0038187 pattern recognition receptor activity; GO:0043167 ion binding; GO:0043168 anion binding; GO:0043177 organic aci…	PF00147	PF00147 Fibrinogen beta and gamma chains, C-terminal globular domain	R	KOG2579	Ficolin and related extracellular proteins
Q9QXM0	Monoacylglycerol lipase ABHD2 OS=Mus musculus OX=10090 GN=Abhd2 PE=1 SV=1	Abhd2	0.630746	0.0121413	Down	7.53	3	3	3	86096.6	98654.3	69512.2	54673.8	54227.2	51474.5	1.24586	1.42757	1.00587	0.791154	0.784691	0.744858	extracellular	K13697			GO:0000003 reproduction; GO:0003006 developmental process involved in reproduction; GO:0006629 lipid metabolic process; GO:0006638 neutral lipid metabolic process; GO:0006639 acylglycerol metabolic process; GO:0006950 response to stress; GO:0007154 cell communication; GO:0007165 signal transduction; GO:0007276 gamete generation; GO:0007281 germ cell development; GO:0007283 spermatogenesis; GO:000…	GO:0001669 acrosomal vesicle; GO:0005622 intracellular anatomical structure; GO:0005737 cytoplasm; GO:0005886 plasma membrane; GO:0005929 cilium; GO:0012505 endomembrane system; GO:0016020 membrane; GO:0030141 secretory granule; GO:0031410 cytoplasmic vesicle; GO:0031514 motile cilium; GO:0031982 vesicle; GO:0036126 sperm flagellum; GO:0042995 cell projection; GO:0043226 organelle; GO:0043227 mem…	GO:0003707 nuclear steroid receptor activity; GO:0003824 catalytic activity; GO:0005488 binding; GO:0016298 lipase activity; GO:0016787 hydrolase activity; GO:0016788 hydrolase activity, acting on ester bonds; GO:0038023 signaling receptor activity; GO:0042562 hormone binding; GO:0047372 acylglycerol lipase activity; GO:0052689 carboxylic ester hydrolase activity; GO:0060089 molecular transducer …	PF00561	PF00561 alpha/beta hydrolase fold	R	KOG1838	Alpha/beta hydrolase
Q99JF8	PC4 and SFRS1-interacting protein OS=Mus musculus OX=10090 GN=Psip1 PE=1 SV=1	Psip1	0.631847	0.0106397	Down	4.55	2	2	2	152263	202888	175522	117236	99378.9	118689	1.05497	1.40573	1.21612	0.81228	0.688556	0.822348	nucleus	K25057	PSIP1; PC4 and SFRS1-interacting protein	mmu03250 Viral life cycle - HIV-1	GO:0000245 spliceosomal complex assembly; GO:0000375 RNA splicing, via transesterification reactions; GO:0000377 RNA splicing, via transesterification reactions with bulged adenosine as nucleophile; GO:0000395 mRNA 5'-splice site recognition; GO:0000398 mRNA splicing, via spliceosome; GO:0003008 system process; GO:0006139 nucleobase-containing compound metabolic process; GO:0006355 regulation of …	GO:0000228 nuclear chromosome; GO:0000785 chromatin; GO:0000792 heterochromatin; GO:0005622 intracellular anatomical structure; GO:0005634 nucleus; GO:0005654 nucleoplasm; GO:0005694 chromosome; GO:0005737 cytoplasm; GO:0005829 cytosol; GO:0031974 membrane-enclosed lumen; GO:0031981 nuclear lumen; GO:0034399 nuclear periphery; GO:0043226 organelle; GO:0043227 membrane-bounded organelle; GO:004322…	GO:0003676 nucleic acid binding; GO:0003677 DNA binding; GO:0003682 chromatin binding; GO:0003690 double-stranded DNA binding; GO:0003712 transcription coregulator activity; GO:0003713 transcription coactivator activity; GO:0005488 binding; GO:0005515 protein binding; GO:0008134 transcription factor binding; GO:0097100 supercoiled DNA binding; GO:0097159 organic cyclic compound binding; GO:014011…	PF00855; PF11467	PF00855 PWWP domain; PF11467 Lens epithelium-derived growth factor (LEDGF)	K	KOG1904	Transcription coactivator
Q9Z211	Peroxisomal membrane protein 11A OS=Mus musculus OX=10090 GN=Pex11a PE=1 SV=1	Pex11a	0.633102	0.0430518	Down	4.07	1	1	1		98335.3	99576.6	71080.7	50159.4	66707.5		1.27424	1.29032	0.92107	0.64997	0.864401	mitochondria	K13351	PEX11A; peroxin-11A	mmu04146 Peroxisome	GO:0006996 organelle organization; GO:0007031 peroxisome organization; GO:0007154 cell communication; GO:0007165 signal transduction; GO:0009987 cellular process; GO:0016043 cellular component organization; GO:0016557 peroxisome membrane biogenesis; GO:0016559 peroxisome fission; GO:0019216 regulation of lipid metabolic process; GO:0019222 regulation of metabolic process; GO:0023052 signaling; GO…	GO:0005622 intracellular anatomical structure; GO:0005737 cytoplasm; GO:0005777 peroxisome; GO:0005778 peroxisomal membrane; GO:0016020 membrane; GO:0031090 organelle membrane; GO:0031903 microbody membrane; GO:0032991 protein-containing complex; GO:0042579 microbody; GO:0043226 organelle; GO:0043227 membrane-bounded organelle; GO:0043229 intracellular organelle; GO:0043231 intracellular membrane…	GO:0005488 binding; GO:0005515 protein binding; GO:0042802 identical protein binding; GO:0042803 protein homodimerization activity; GO:0046983 protein dimerization activity;			U	KOG4186	Peroxisomal biogenesis protein (peroxin)
P56959	RNA-binding protein FUS OS=Mus musculus OX=10090 GN=Fus PE=1 SV=1	Fus	0.634078	0.00327259	Down	4.83	2	2	2	476813	542731	575281	366031	333324	311889	1.09778	1.24954	1.32448	0.84272	0.767418	0.718068	nucleus	K13098	TLS; RNA-binding protein FUS	mmu03015 mRNA surveillance pathway; mmu03040 Spliceosome; mmu05022 Pathways of neurodegeneration - multiple diseases; mmu05014 Amyotrophic lateral sclerosis; mmu05202 Transcriptional misregulation in cancer	GO:0000375 RNA splicing, via transesterification reactions; GO:0000377 RNA splicing, via transesterification reactions with bulged adenosine as nucleophile; GO:0000398 mRNA splicing, via spliceosome; GO:0001654 eye development; GO:0006139 nucleobase-containing compound metabolic process; GO:0006351 DNA-templated transcription; GO:0006352 DNA-templated transcription initiation; GO:0006366 transcri…	GO:0000428 DNA-directed RNA polymerase complex; GO:0005622 intracellular anatomical structure; GO:0005634 nucleus; GO:0005654 nucleoplasm; GO:0005667 transcription regulator complex; GO:0005669 transcription factor TFIID complex; GO:0005737 cytoplasm; GO:0005844 polysome; GO:0016591 RNA polymerase II, holoenzyme; GO:0030425 dendrite; GO:0030880 RNA polymerase complex; GO:0031974 membrane-enclosed…	GO:0003676 nucleic acid binding; GO:0003712 transcription coregulator activity; GO:0003713 transcription coactivator activity; GO:0003723 RNA binding; GO:0003729 mRNA binding; GO:0005102 signaling receptor binding; GO:0005488 binding; GO:0005515 protein binding; GO:0008092 cytoskeletal protein binding; GO:0008134 transcription factor binding; GO:0017022 myosin binding; GO:0030331 nuclear estrogen…	PF00076; PF00641	PF00076 RNA recognition motif. (a.k.a. RRM, RBD, or RNP domain); PF00641 Zn-finger in Ran binding protein and others	R	KOG1995	Conserved Zn-finger protein
P25911	Tyrosine-protein kinase Lyn OS=Mus musculus OX=10090 GN=Lyn PE=1 SV=4	Lyn	0.636126	0.02279	Down	10.55	5	5	5	341563	431325	512585	290768	265758	261197	0.974411	1.23048	1.4623	0.829503	0.758155	0.745143	cytoplasm	K05854	LYN; tyrosine-protein kinase Lyn [EC:2.7.10.2]	mmu04064 NF-kappa B signaling pathway; mmu05203 Viral carcinogenesis; mmu04062 Chemokine signaling pathway; mmu04666 Fc gamma R-mediated phagocytosis; mmu05417 Lipid and atherosclerosis; mmu05167 Kaposi sarcoma-associated herpesvirus infection; mmu05169 Epstein-Barr virus infection; mmu04662 B cell receptor signaling pathway; mmu04664 Fc epsilon RI signaling pathway; mmu04730 Long-term depression…	GO:0001101 response to acid chemical; GO:0001775 cell activation; GO:0001776 leukocyte homeostasis; GO:0001782 B cell homeostasis; GO:0001816 cytokine production; GO:0001817 regulation of cytokine production; GO:0001821 histamine secretion; GO:0001932 regulation of protein phosphorylation; GO:0001933 negative regulation of protein phosphorylation; GO:0001934 positive regulation of protein phospho…	GO:0005622 intracellular anatomical structure; GO:0005634 nucleus; GO:0005737 cytoplasm; GO:0005739 mitochondrion; GO:0005740 mitochondrial envelope; GO:0005743 mitochondrial inner membrane; GO:0005758 mitochondrial intermembrane space; GO:0005794 Golgi apparatus; GO:0005829 cytosol; GO:0005886 plasma membrane; GO:0005911 cell-cell junction; GO:0005912 adherens junction; GO:0008305 integrin compl…	GO:0003824 catalytic activity; GO:0004672 protein kinase activity; GO:0004713 protein tyrosine kinase activity; GO:0004715 non-membrane spanning protein tyrosine kinase activity; GO:0005102 signaling receptor binding; GO:0005126 cytokine receptor binding; GO:0005128 erythropoietin receptor binding; GO:0005161 platelet-derived growth factor receptor binding; GO:0005178 integrin binding; GO:0005488…	PF00018; PF00017; PF07714	PF00018 SH3 domain; PF00017 SH2 domain; PF07714 Protein tyrosine and serine/threonine kinase	T	KOG0197	Tyrosine kinases
O08601	Microsomal triglyceride transfer protein large subunit OS=Mus musculus OX=10090 GN=Mttp PE=1 SV=2	Mttp	0.63693	0.00594561	Down	9.73	7	7	7	414665	462966	493034	331337	265383	276297	1.10889	1.23805	1.31846	0.886053	0.709681	0.738867	endoplasmic reticulum	K14463	MTTP; microsomal triglyceride transfer protein large subunit	mmu04975 Fat digestion and absorption	GO:0000902 cell morphogenesis; GO:0001525 angiogenesis; GO:0001568 blood vessel development; GO:0001579 medium-chain fatty acid transport; GO:0001944 vasculature development; GO:0002040 sprouting angiogenesis; GO:0002790 peptide secretion; GO:0006497 protein lipidation; GO:0006629 lipid metabolic process; GO:0006638 neutral lipid metabolic process; GO:0006639 acylglycerol metabolic process; GO:00…	GO:0005622 intracellular anatomical structure; GO:0005737 cytoplasm; GO:0005783 endoplasmic reticulum; GO:0005788 endoplasmic reticulum lumen; GO:0005791 rough endoplasmic reticulum; GO:0005794 Golgi apparatus; GO:0005886 plasma membrane; GO:0005902 microvillus; GO:0005903 brush border; GO:0012505 endomembrane system; GO:0016020 membrane; GO:0016323 basolateral plasma membrane; GO:0031253 cell pr…	GO:0005215 transporter activity; GO:0005319 lipid transporter activity; GO:0005488 binding; GO:0005515 protein binding; GO:0005548 phospholipid transporter activity; GO:0008525 phosphatidylcholine transporter activity; GO:0034185 apolipoprotein binding; GO:0046982 protein heterodimerization activity; GO:0046983 protein dimerization activity;	PF19444	PF19444 MTP large subunit, lipid-binding domain	IU	KOG4337	Microsomal triglyceride transfer protein
P27048	Small nuclear ribonucleoprotein-associated protein B OS=Mus musculus OX=10090 GN=Snrpb PE=1 SV=1	Snrpb	0.637031	0.0151761	Down	9.52	2	2	2	296773	374819	384096	254686	220381	197439	1.03035	1.30131	1.33352	0.884227	0.765126	0.685475	cytoplasm	K11086	SNRPB; small nuclear ribonucleoprotein B and B'	mmu05322 Systemic lupus erythematosus; mmu03040 Spliceosome	GO:0000003 reproduction; GO:0000375 RNA splicing, via transesterification reactions; GO:0000377 RNA splicing, via transesterification reactions with bulged adenosine as nucleophile; GO:0000387 spliceosomal snRNP assembly; GO:0000398 mRNA splicing, via spliceosome; GO:0003006 developmental process involved in reproduction; GO:0006139 nucleobase-containing compound metabolic process; GO:0006351 DNA…	GO:0005622 intracellular anatomical structure; GO:0005634 nucleus; GO:0005654 nucleoplasm; GO:0005681 spliceosomal complex; GO:0005682 U5 snRNP; GO:0005683 U7 snRNP; GO:0005684 U2-type spliceosomal complex; GO:0005685 U1 snRNP; GO:0005686 U2 snRNP; GO:0005687 U4 snRNP; GO:0005689 U12-type spliceosomal complex; GO:0005697 telomerase holoenzyme complex; GO:0005737 cytoplasm; GO:0005829 cytosol; GO:…	GO:0003676 nucleic acid binding; GO:0003723 RNA binding; GO:0005488 binding; GO:0017069 snRNA binding; GO:0030620 U2 snRNA binding; GO:0043021 ribonucleoprotein complex binding; GO:0044877 protein-containing complex binding; GO:0070034 telomerase RNA binding; GO:0070990 snRNP binding; GO:0071208 histone pre-mRNA DCP binding; GO:0097159 organic cyclic compound binding; GO:1901363 heterocyclic comp…	PF01423	PF01423 LSM domain	K	KOG3168	U1 snRNP component
Q8BUK6	Protein Hook homolog 3 OS=Mus musculus OX=10090 GN=Hook3 PE=1 SV=2	Hook3	0.639167	0.0198545	Down	2.92	2	2	2	85634.5	90041.1	97411.7	72242.4	49538	52768	1.14782	1.20689	1.30568	0.96832	0.663995	0.707289	cytoplasm	K16536	HOOK3; protein HOOK3	mmu04814 Motor proteins	GO:0000226 microtubule cytoskeleton organization; GO:0001654 eye development; GO:0001745 compound eye morphogenesis; GO:0001751 compound eye photoreceptor cell differentiation; GO:0001754 eye photoreceptor cell differentiation; GO:0006810 transport; GO:0006897 endocytosis; GO:0006996 organelle organization; GO:0007010 cytoskeleton organization; GO:0007017 microtubule-based process; GO:0007032 end…	GO:0000242 pericentriolar material; GO:0005622 intracellular anatomical structure; GO:0005737 cytoplasm; GO:0005768 endosome; GO:0005794 Golgi apparatus; GO:0005801 cis-Golgi network; GO:0005813 centrosome; GO:0005815 microtubule organizing center; GO:0005856 cytoskeleton; GO:0012505 endomembrane system; GO:0015630 microtubule cytoskeleton; GO:0031410 cytoplasmic vesicle; GO:0031982 vesicle; GO:0…	GO:0005488 binding; GO:0005515 protein binding; GO:0008017 microtubule binding; GO:0008092 cytoskeletal protein binding; GO:0015631 tubulin binding; GO:0019899 enzyme binding; GO:0031267 small GTPase binding; GO:0034452 dynactin binding; GO:0042802 identical protein binding; GO:0045503 dynein light chain binding; GO:0045505 dynein intermediate chain binding; GO:0051020 GTPase binding; GO:0051959 …	PF19047	PF19047 HOOK domain
Q91XV3	Brain acid soluble protein 1 OS=Mus musculus OX=10090 GN=Basp1 PE=1 SV=3	Basp1	0.640167	0.000821081	Down	21.68	3	3	3	3747210	3292720	3566280	2126540	2362410	2300800	1.29244	1.13568	1.23004	0.73346	0.814813	0.793564	nucleus	K17272			GO:0000003 reproduction; GO:0000578 embryonic axis specification; GO:0001655 urogenital system development; GO:0001656 metanephros development; GO:0001822 kidney development; GO:0003002 regionalization; GO:0003006 developmental process involved in reproduction; GO:0006355 regulation of DNA-templated transcription; GO:0007275 multicellular organism development; GO:0007350 blastoderm segmentation; …	GO:0005622 intracellular anatomical structure; GO:0005634 nucleus; GO:0005654 nucleoplasm; GO:0005737 cytoplasm; GO:0005856 cytoskeleton; GO:0005886 plasma membrane; GO:0005938 cell cortex; GO:0009898 cytoplasmic side of plasma membrane; GO:0016020 membrane; GO:0016604 nuclear body; GO:0016607 nuclear speck; GO:0019897 extrinsic component of plasma membrane; GO:0019898 extrinsic component of memb…	GO:0001067 transcription regulatory region nucleic acid binding; GO:0003676 nucleic acid binding; GO:0003677 DNA binding; GO:0003712 transcription coregulator activity; GO:0003714 transcription corepressor activity; GO:0005488 binding; GO:0005515 protein binding; GO:0019904 protein domain specific binding; GO:0097159 organic cyclic compound binding; GO:0140110 transcription regulator activity; GO…
A2AJK6	Chromodomain-helicase-DNA-binding protein 7 OS=Mus musculus OX=10090 GN=Chd7 PE=1 SV=1	Chd7	0.64046	0.0359737	Down	0.3	1	1	1	88865.2	130148	113016	77125.2	76512.2	59014	0.978906	1.43366	1.24494	0.849583	0.84283	0.650076	nucleus	K14437			GO:0000003 reproduction; GO:0000122 negative regulation of transcription by RNA polymerase II; GO:0000902 cell morphogenesis; GO:0001501 skeletal system development; GO:0001568 blood vessel development; GO:0001654 eye development; GO:0001667 ameboidal-type cell migration; GO:0001701 in utero embryonic development; GO:0001775 cell activation; GO:0001944 vasculature development; GO:0001964 startle …	GO:0005622 intracellular anatomical structure; GO:0005634 nucleus; GO:0005654 nucleoplasm; GO:0005730 nucleolus; GO:0031974 membrane-enclosed lumen; GO:0031981 nuclear lumen; GO:0032991 protein-containing complex; GO:0034708 methyltransferase complex; GO:0035097 histone methyltransferase complex; GO:0043226 organelle; GO:0043227 membrane-bounded organelle; GO:0043228 non-membrane-bounded organell…	GO:0000166 nucleotide binding; GO:0000976 transcription cis-regulatory region binding; GO:0000977 RNA polymerase II transcription regulatory region sequence-specific DNA binding; GO:0000978 RNA polymerase II cis-regulatory region sequence-specific DNA binding; GO:0000987 cis-regulatory region sequence-specific DNA binding; GO:0001067 transcription regulatory region nucleic acid binding; GO:000203…	PF00385; PF00176; PF00271; PF07533	PF00385 Chromo (CHRromatin Organisation MOdifier) domain; PF00176 SNF2-related domain; PF00271 Helicase conserved C-terminal domain; PF07533 BRK domain	K	KOG0384	Chromodomain-helicase DNA-binding protein
Q99M31	Heat shock 70 kDa protein 14 OS=Mus musculus OX=10090 GN=Hspa14 PE=1 SV=2	Hspa14	0.640556	0.0313376	Down	6.09	3	3	3	60882	69021.2	63294.1	53227.7	34604.2	35921.8	1.15252	1.3066	1.19818	1.00762	0.65507	0.680013	cytoplasm,nucleus				GO:0006457 protein folding; GO:0006458 'de novo' protein folding; GO:0009987 cellular process; GO:0051083 'de novo' cotranslational protein folding;	GO:0005622 intracellular anatomical structure; GO:0005737 cytoplasm; GO:0005829 cytosol;				O	KOG0101	Molecular chaperones HSP70/HSC70, HSP70 superfamily
P62717	Large ribosomal subunit protein eL20 OS=Mus musculus OX=10090 GN=Rpl18a PE=1 SV=1	Rpl18a	0.64171	0.00112601	Down	15.34	3	3	3	1249840	1281930	1386430	772617	896104	845626	1.1658	1.19573	1.2932	0.720664	0.835847	0.788763	cytoplasm	K02882	RP-L18Ae; large subunit ribosomal protein L18Ae	mmu03010 Ribosome; mmu05171 Coronavirus disease - COVID-19	GO:0000184 nuclear-transcribed mRNA catabolic process, nonsense-mediated decay; GO:0000956 nuclear-transcribed mRNA catabolic process; GO:0002181 cytoplasmic translation; GO:0006139 nucleobase-containing compound metabolic process; GO:0006401 RNA catabolic process; GO:0006402 mRNA catabolic process; GO:0006412 translation; GO:0006413 translational initiation; GO:0006518 peptide metabolic process;…	GO:0005622 intracellular anatomical structure; GO:0005737 cytoplasm; GO:0005829 cytosol; GO:0005840 ribosome; GO:0005844 polysome; GO:0015934 large ribosomal subunit; GO:0022625 cytosolic large ribosomal subunit; GO:0022626 cytosolic ribosome; GO:0032991 protein-containing complex; GO:0042788 polysomal ribosome; GO:0043226 organelle; GO:0043228 non-membrane-bounded organelle; GO:0043229 intracell…	GO:0003676 nucleic acid binding; GO:0003723 RNA binding; GO:0003735 structural constituent of ribosome; GO:0005198 structural molecule activity; GO:0005488 binding; GO:0097159 organic cyclic compound binding; GO:1901363 heterocyclic compound binding;	PF01775	PF01775 Ribosomal proteins 50S-L18Ae/60S-L20/60S-L18A	J	KOG0829	60S ribosomal protein L18A
Q6PHQ8	N-alpha-acetyltransferase 35, NatC auxiliary subunit OS=Mus musculus OX=10090 GN=Naa35 PE=1 SV=1	Naa35	0.641853	0.00311649	Down	3.17	2	2	2	158189	164384	164974	117448	102984	92501.4	1.18571	1.23214	1.23656	0.880331	0.771916	0.693344	cytoplasm	K20823			GO:0001568 blood vessel development; GO:0001756 somitogenesis; GO:0001944 vasculature development; GO:0002119 nematode larval development; GO:0002164 larval development; GO:0003002 regionalization; GO:0006473 protein acetylation; GO:0006474 N-terminal protein amino acid acetylation; GO:0006807 nitrogen compound metabolic process; GO:0006950 response to stress; GO:0007275 multicellular organism de…	GO:0005622 intracellular anatomical structure; GO:0005737 cytoplasm; GO:0031248 protein acetyltransferase complex; GO:0031414 N-terminal protein acetyltransferase complex; GO:0031417 NatC complex; GO:0032991 protein-containing complex; GO:1902493 acetyltransferase complex; GO:1902494 catalytic complex; GO:1990234 transferase complex;	GO:0003824 catalytic activity; GO:0004596 peptide alpha-N-acetyltransferase activity; GO:0008080 N-acetyltransferase activity; GO:0016407 acetyltransferase activity; GO:0016410 N-acyltransferase activity; GO:0016740 transferase activity; GO:0016746 acyltransferase activity; GO:0016747 acyltransferase activity, transferring groups other than amino-acyl groups; GO:0034212 peptide N-acetyltransferas…			R	KOG2343	Glucose-repressible protein and related proteins
B2RY56	RNA-binding protein 25 OS=Mus musculus OX=10090 GN=Rbm25 PE=1 SV=2	Rbm25	0.641931	0.0225082	Down	4.65	3	3	3	47639.3	56943.2	70687.4	35613.8	40098.5	36798.8	0.993241	1.18722	1.47377	0.742519	0.836021	0.767225	cytoplasm	K12822	RBM25; RNA-binding protein 25	mmu03040 Spliceosome	GO:0000375 RNA splicing, via transesterification reactions; GO:0000377 RNA splicing, via transesterification reactions with bulged adenosine as nucleophile; GO:0000381 regulation of alternative mRNA splicing, via spliceosome; GO:0000398 mRNA splicing, via spliceosome; GO:0006139 nucleobase-containing compound metabolic process; GO:0006396 RNA processing; GO:0006397 mRNA processing; GO:0006725 cel…	GO:0005622 intracellular anatomical structure; GO:0005634 nucleus; GO:0005654 nucleoplasm; GO:0005681 spliceosomal complex; GO:0005737 cytoplasm; GO:0016604 nuclear body; GO:0016607 nuclear speck; GO:0031974 membrane-enclosed lumen; GO:0031981 nuclear lumen; GO:0032991 protein-containing complex; GO:0043226 organelle; GO:0043227 membrane-bounded organelle; GO:0043229 intracellular organelle; GO:0…	GO:0003676 nucleic acid binding; GO:0003723 RNA binding; GO:0003729 mRNA binding; GO:0005488 binding; GO:0097159 organic cyclic compound binding; GO:1901363 heterocyclic compound binding;	PF00076	PF00076 RNA recognition motif. (a.k.a. RRM, RBD, or RNP domain)	A	KOG2253	U1 snRNP complex, subunit SNU71 and related PWI-motif proteins
Q921M3	Splicing factor 3B subunit 3 OS=Mus musculus OX=10090 GN=Sf3b3 PE=1 SV=1	Sf3b3	0.643132	0.00281754	Down	6.66	6	6	6	255049	277233	305300	178169	166950	193557	1.11192	1.20864	1.331	0.776754	0.727843	0.84384	plasma membrane	K12830	SF3B3; splicing factor 3B subunit 3	mmu03040 Spliceosome	GO:0000375 RNA splicing, via transesterification reactions; GO:0000377 RNA splicing, via transesterification reactions with bulged adenosine as nucleophile; GO:0000398 mRNA splicing, via spliceosome; GO:0006139 nucleobase-containing compound metabolic process; GO:0006396 RNA processing; GO:0006397 mRNA processing; GO:0006725 cellular aromatic compound metabolic process; GO:0006807 nitrogen compou…	GO:0005622 intracellular anatomical structure; GO:0005634 nucleus; GO:0005654 nucleoplasm; GO:0005681 spliceosomal complex; GO:0005684 U2-type spliceosomal complex; GO:0005686 U2 snRNP; GO:0005689 U12-type spliceosomal complex; GO:0005730 nucleolus; GO:0030532 small nuclear ribonucleoprotein complex; GO:0031974 membrane-enclosed lumen; GO:0031981 nuclear lumen; GO:0032991 protein-containing compl…	GO:0003676 nucleic acid binding; GO:0003723 RNA binding; GO:0005488 binding; GO:0044877 protein-containing complex binding; GO:0097159 organic cyclic compound binding; GO:1901363 heterocyclic compound binding;	PF10433	PF10433 Mono-functional DNA-alkylating methyl methanesulfonate N-term	A	KOG1898	Splicing factor 3b, subunit 3
B1AY13	Ubiquitin carboxyl-terminal hydrolase 24 OS=Mus musculus OX=10090 GN=Usp24 PE=1 SV=1	Usp24	0.644411	0.0115768	Down	1.07	2	2	2	86640	78627.1	102575	54918.8	52982.6	64699	1.18027	1.07111	1.39734	0.74814	0.721764	0.881373	cytoplasm,nucleus	K11840			GO:0006508 proteolysis; GO:0006807 nitrogen compound metabolic process; GO:0008152 metabolic process; GO:0009987 cellular process; GO:0016579 protein deubiquitination; GO:0019538 protein metabolic process; GO:0036211 protein modification process; GO:0043170 macromolecule metabolic process; GO:0043412 macromolecule modification; GO:0044237 cellular metabolic process; GO:0044238 primary metabolic p…	GO:0005622 intracellular anatomical structure; GO:0005634 nucleus; GO:0005654 nucleoplasm; GO:0031974 membrane-enclosed lumen; GO:0031981 nuclear lumen; GO:0043226 organelle; GO:0043227 membrane-bounded organelle; GO:0043229 intracellular organelle; GO:0043231 intracellular membrane-bounded organelle; GO:0043233 organelle lumen; GO:0070013 intracellular organelle lumen;	GO:0003824 catalytic activity; GO:0008233 peptidase activity; GO:0008234 cysteine-type peptidase activity; GO:0016787 hydrolase activity; GO:0019783 ubiquitin-like protein peptidase activity; GO:0101005 deubiquitinase activity; GO:0140096 catalytic activity, acting on a protein;			O	KOG1866	Ubiquitin carboxyl-terminal hydrolase
Q99N84	Small ribosomal subunit protein mS40 OS=Mus musculus OX=10090 GN=Mrps18b PE=1 SV=1	Mrps18b	0.644627	0.0353184	Down	7.87	2	2	2	109072	147257	100997	79762.8	65838.9	84740.2	1.11361	1.50347	1.03116	0.814366	0.672205	0.865185	mitochondria	K16174	MRPS18B; small subunit ribosomal protein S18b, mitochondrial	mmu05203 Viral carcinogenesis	GO:0006412 translation; GO:0006414 translational elongation; GO:0006415 translational termination; GO:0006518 peptide metabolic process; GO:0006807 nitrogen compound metabolic process; GO:0008152 metabolic process; GO:0009058 biosynthetic process; GO:0009059 macromolecule biosynthetic process; GO:0009987 cellular process; GO:0010467 gene expression; GO:0016043 cellular component organization; GO:…	GO:0000313 organellar ribosome; GO:0000314 organellar small ribosomal subunit; GO:0005622 intracellular anatomical structure; GO:0005634 nucleus; GO:0005654 nucleoplasm; GO:0005737 cytoplasm; GO:0005739 mitochondrion; GO:0005740 mitochondrial envelope; GO:0005743 mitochondrial inner membrane; GO:0005759 mitochondrial matrix; GO:0005761 mitochondrial ribosome; GO:0005763 mitochondrial small riboso…	GO:0003735 structural constituent of ribosome; GO:0005198 structural molecule activity;			J	KOG4021	Mitochondrial ribosomal protein S18b
P97461	Small ribosomal subunit protein uS7 OS=Mus musculus OX=10090 GN=Rps5 PE=1 SV=4	Rps5	0.645176	0.0475951	Down	16.67	3	3	3	390917	573065	564259	290348	387154	308483	0.932892	1.36757	1.34656	0.692892	0.923912	0.73617	cytoplasm	K02989	RP-S5e; small subunit ribosomal protein S5e	mmu03010 Ribosome; mmu05171 Coronavirus disease - COVID-19	GO:0000028 ribosomal small subunit assembly; GO:0000184 nuclear-transcribed mRNA catabolic process, nonsense-mediated decay; GO:0000956 nuclear-transcribed mRNA catabolic process; GO:0002181 cytoplasmic translation; GO:0006139 nucleobase-containing compound metabolic process; GO:0006401 RNA catabolic process; GO:0006402 mRNA catabolic process; GO:0006412 translation; GO:0006413 translational init…	GO:0005622 intracellular anatomical structure; GO:0005634 nucleus; GO:0005654 nucleoplasm; GO:0005730 nucleolus; GO:0005737 cytoplasm; GO:0005829 cytosol; GO:0005840 ribosome; GO:0015935 small ribosomal subunit; GO:0022626 cytosolic ribosome; GO:0022627 cytosolic small ribosomal subunit; GO:0031974 membrane-enclosed lumen; GO:0031981 nuclear lumen; GO:0032991 protein-containing complex; GO:004322…	GO:0003676 nucleic acid binding; GO:0003723 RNA binding; GO:0003729 mRNA binding; GO:0003735 structural constituent of ribosome; GO:0005198 structural molecule activity; GO:0005488 binding; GO:0019843 rRNA binding; GO:0097159 organic cyclic compound binding; GO:1901363 heterocyclic compound binding;	PF00177	PF00177 Ribosomal protein S7p/S5e	J	KOG3291	Ribosomal protein S7
P36371	Antigen peptide transporter 2 OS=Mus musculus OX=10090 GN=Tap2 PE=1 SV=1	Tap2	0.645281	0.0388011	Down	4.13	3	3	3	153489	194028	216281	142699	121378	99731.3	0.992807	1.25502	1.39896	0.923014	0.785105	0.645088	plasma membrane	K05654	ABCB3; ATP-binding cassette, subfamily B (MDR/TAP), member 3 [EC:7.4.2.14]	mmu04612 Antigen processing and presentation; mmu05169 Epstein-Barr virus infection; mmu05340 Primary immunodeficiency; mmu02010 ABC transporters; mmu05168 Herpes simplex virus 1 infection; mmu05163 Human cytomegalovirus infection; mmu05170 Human immunodeficiency virus 1 infection; mmu04145 Phagosome	GO:0001910 regulation of leukocyte mediated cytotoxicity; GO:0001911 negative regulation of leukocyte mediated cytotoxicity; GO:0001912 positive regulation of leukocyte mediated cytotoxicity; GO:0001914 regulation of T cell mediated cytotoxicity; GO:0001916 positive regulation of T cell mediated cytotoxicity; GO:0002237 response to molecule of bacterial origin; GO:0002376 immune system process; G…	GO:0005622 intracellular anatomical structure; GO:0005634 nucleus; GO:0005654 nucleoplasm; GO:0005737 cytoplasm; GO:0005783 endoplasmic reticulum; GO:0005789 endoplasmic reticulum membrane; GO:0005793 endoplasmic reticulum-Golgi intermediate compartment; GO:0012505 endomembrane system; GO:0012506 vesicle membrane; GO:0016020 membrane; GO:0016604 nuclear body; GO:0016607 nuclear speck; GO:0030139 …	GO:0000166 nucleotide binding; GO:0003824 catalytic activity; GO:0005102 signaling receptor binding; GO:0005215 transporter activity; GO:0005488 binding; GO:0005515 protein binding; GO:0005524 ATP binding; GO:0015399 primary active transmembrane transporter activity; GO:0015433 ABC-type peptide antigen transporter activity; GO:0015440 ABC-type peptide transporter activity; GO:0016462 pyrophosphat…	PF00005	PF00005 ABC transporter	U	KOG0058	Peptide exporter, ABC superfamily
Q80WS3	rRNA/tRNA 2'-O-methyltransferase fibrillarin-like protein 1 OS=Mus musculus OX=10090 GN=Fbll1 PE=1 SV=1	Fbll1	0.645357	0.0362057	Down	7.96	2	1	1	2246200	3257830	3043250	2141790	1677070	1697190	0.958322	1.38993	1.29838	0.913776	0.715508	0.724092	nucleus	K14563	NOP1; rRNA 2'-O-methyltransferase fibrillarin [EC:2.1.1.-]	mmu03008 Ribosome biogenesis in eukaryotes	GO:0000154 rRNA modification; GO:0000494 box C/D RNA 3'-end processing; GO:0001510 RNA methylation; GO:0006139 nucleobase-containing compound metabolic process; GO:0006325 chromatin organization; GO:0006364 rRNA processing; GO:0006396 RNA processing; GO:0006479 protein methylation; GO:0006725 cellular aromatic compound metabolic process; GO:0006807 nitrogen compound metabolic process; GO:0006996 …	GO:0001650 fibrillar center; GO:0005622 intracellular anatomical structure; GO:0005634 nucleus; GO:0005654 nucleoplasm; GO:0005730 nucleolus; GO:0005732 sno(s)RNA-containing ribonucleoprotein complex; GO:0015030 Cajal body; GO:0016604 nuclear body; GO:0030684 preribosome; GO:0031428 box C/D RNP complex; GO:0031974 membrane-enclosed lumen; GO:0031981 nuclear lumen; GO:0032040 small-subunit process…	GO:0003676 nucleic acid binding; GO:0003723 RNA binding; GO:0003824 catalytic activity; GO:0005488 binding; GO:0008168 methyltransferase activity; GO:0008170 N-methyltransferase activity; GO:0008173 RNA methyltransferase activity; GO:0008276 protein methyltransferase activity; GO:0008649 rRNA methyltransferase activity; GO:0008757 S-adenosylmethionine-dependent methyltransferase activity; GO:0016…	PF01269	PF01269 Fibrillarin	A	KOG1596	Fibrillarin and related nucleolar RNA-binding proteins
Q99M28	RNA-binding protein with serine-rich domain 1 OS=Mus musculus OX=10090 GN=Rnps1 PE=1 SV=1	Rnps1	0.645709	0.0285773	Down	2.95	1	1	1	129581	194209	142062	100160	94986.8	105658	1.01413	1.51992	1.1118	0.783871	0.743385	0.826899	nucleus	K14325	RNPS1; RNA-binding protein with serine-rich domain 1	mmu03013 Nucleocytoplasmic transport; mmu03015 mRNA surveillance pathway	GO:0000018 regulation of DNA recombination; GO:0000184 nuclear-transcribed mRNA catabolic process, nonsense-mediated decay; GO:0000375 RNA splicing, via transesterification reactions; GO:0000377 RNA splicing, via transesterification reactions with bulged adenosine as nucleophile; GO:0000381 regulation of alternative mRNA splicing, via spliceosome; GO:0000398 mRNA splicing, via spliceosome; GO:000…	GO:0005622 intracellular anatomical structure; GO:0005634 nucleus; GO:0005654 nucleoplasm; GO:0005737 cytoplasm; GO:0005829 cytosol; GO:0016604 nuclear body; GO:0016607 nuclear speck; GO:0031974 membrane-enclosed lumen; GO:0031981 nuclear lumen; GO:0032991 protein-containing complex; GO:0043226 organelle; GO:0043227 membrane-bounded organelle; GO:0043229 intracellular organelle; GO:0043231 intrac…	GO:0003676 nucleic acid binding; GO:0003723 RNA binding; GO:0003729 mRNA binding; GO:0003730 mRNA 3'-UTR binding; GO:0005488 binding; GO:0097159 organic cyclic compound binding; GO:1901363 heterocyclic compound binding;	PF00076	PF00076 RNA recognition motif. (a.k.a. RRM, RBD, or RNP domain)	A	KOG4209	Splicing factor RNPS1, SR protein superfamily
Q9CQF3	Cleavage and polyadenylation specificity factor subunit 5 OS=Mus musculus OX=10090 GN=Nudt21 PE=1 SV=1	Nudt21	0.64595	0.0396992	Down	3.96	1	1	1	114773	135485	131593	106674	72807.7	67175.1	1.09567	1.2934	1.25624	1.01835	0.695053	0.641282	mitochondria	K14397	NUDT21; cleavage and polyadenylation specificity factor subunit 5	mmu03015 mRNA surveillance pathway	GO:0000375 RNA splicing, via transesterification reactions; GO:0000377 RNA splicing, via transesterification reactions with bulged adenosine as nucleophile; GO:0000398 mRNA splicing, via spliceosome; GO:0002682 regulation of immune system process; GO:0002684 positive regulation of immune system process; GO:0006139 nucleobase-containing compound metabolic process; GO:0006351 DNA-templated transcri…	GO:0005622 intracellular anatomical structure; GO:0005634 nucleus; GO:0005654 nucleoplasm; GO:0005737 cytoplasm; GO:0005813 centrosome; GO:0005815 microtubule organizing center; GO:0005847 mRNA cleavage and polyadenylation specificity factor complex; GO:0005849 mRNA cleavage factor complex; GO:0005856 cytoskeleton; GO:0015630 microtubule cytoskeleton; GO:0016604 nuclear body; GO:0031974 membrane-…	GO:0003676 nucleic acid binding; GO:0003682 chromatin binding; GO:0003723 RNA binding; GO:0003729 mRNA binding; GO:0005488 binding; GO:0005515 protein binding; GO:0019899 enzyme binding; GO:0042802 identical protein binding; GO:0042803 protein homodimerization activity; GO:0042826 histone deacetylase binding; GO:0046983 protein dimerization activity; GO:0097159 organic cyclic compound binding; GO…	PF13869	PF13869 Nucleotide hydrolase	A	KOG1689	mRNA cleavage factor I subunit
P70403	Protein CASP OS=Mus musculus OX=10090 GN=Cux1 PE=1 SV=2	Cux1	0.64645	0.0349574	Down	2.8	2	2	1	138138	124515	155485	91666.3	108590	70049	1.20392	1.08519	1.3551	0.798901	0.946396	0.610499	cytoplasm									K	KOG0963	Transcription factor/CCAAT displacement protein CDP1
Q9Z204	Heterogeneous nuclear ribonucleoproteins C1/C2 OS=Mus musculus OX=10090 GN=Hnrnpc PE=1 SV=1	Hnrnpc	0.647064	0.0262965	Down	7.67	3	3	3	749269	1029920	1107820	619928	651372	596781	0.945432	1.29956	1.39785	0.782229	0.821905	0.753022	nucleus	K12884	HNRNPC; heterogeneous nuclear ribonucleoprotein C1/C2	mmu03040 Spliceosome	GO:0000375 RNA splicing, via transesterification reactions; GO:0000377 RNA splicing, via transesterification reactions with bulged adenosine as nucleophile; GO:0000398 mRNA splicing, via spliceosome; GO:0006139 nucleobase-containing compound metabolic process; GO:0006396 RNA processing; GO:0006397 mRNA processing; GO:0006725 cellular aromatic compound metabolic process; GO:0006807 nitrogen compou…	GO:0005622 intracellular anatomical structure; GO:0005634 nucleus; GO:0005654 nucleoplasm; GO:0005681 spliceosomal complex; GO:0005697 telomerase holoenzyme complex; GO:0005737 cytoplasm; GO:0005829 cytosol; GO:0005856 cytoskeleton; GO:0015629 actin cytoskeleton; GO:0031974 membrane-enclosed lumen; GO:0031981 nuclear lumen; GO:0032991 protein-containing complex; GO:0043226 organelle; GO:0043227 m…	GO:0003676 nucleic acid binding; GO:0003723 RNA binding; GO:0003727 single-stranded RNA binding; GO:0003729 mRNA binding; GO:0003730 mRNA 3'-UTR binding; GO:0004857 enzyme inhibitor activity; GO:0005488 binding; GO:0005515 protein binding; GO:0008187 poly-pyrimidine tract binding; GO:0008266 poly(U) RNA binding; GO:0019899 enzyme binding; GO:0019904 protein domain specific binding; GO:0030234 enz…	PF00076	PF00076 RNA recognition motif. (a.k.a. RRM, RBD, or RNP domain)	R	KOG0118	FOG: RRM domain
Q6PF93	Phosphatidylinositol 3-kinase catalytic subunit type 3 OS=Mus musculus OX=10090 GN=Pik3c3 PE=1 SV=1	Pik3c3	0.647824	0.01941	Down	3.83	3	3	3	268538	233038	247187	195806	134131	155130	1.30588	1.13324	1.20205	0.952186	0.652267	0.754383	cytoplasm	K00914	PIK3C3; phosphatidylinositol 3-kinase [EC:2.7.1.137]	mmu04136 Autophagy - other; mmu04070 Phosphatidylinositol signaling system; mmu04371 Apelin signaling pathway; mmu04140 Autophagy - animal; mmu05016 Huntington disease; mmu01100 Metabolic pathways; mmu05132 Salmonella infection; mmu05014 Amyotrophic lateral sclerosis; mmu05152 Tuberculosis; mmu05167 Kaposi sarcoma-associated herpesvirus infection; mmu05010 Alzheimer disease; mmu05017 Spinocerebel…	GO:0000003 reproduction; GO:0000045 autophagosome assembly; GO:0001101 response to acid chemical; GO:0001894 tissue homeostasis; GO:0002119 nematode larval development; GO:0002164 larval development; GO:0002165 instar larval or pupal development; GO:0002218 activation of innate immune response; GO:0002221 pattern recognition receptor signaling pathway; GO:0002224 toll-like receptor signaling path…	GO:0000323 lytic vacuole; GO:0000407 phagophore assembly site; GO:0000421 autophagosome membrane; GO:0005622 intracellular anatomical structure; GO:0005634 nucleus; GO:0005635 nuclear envelope; GO:0005640 nuclear outer membrane; GO:0005730 nucleolus; GO:0005737 cytoplasm; GO:0005764 lysosome; GO:0005767 secondary lysosome; GO:0005768 endosome; GO:0005769 early endosome; GO:0005770 late endosome; …	GO:0003824 catalytic activity; GO:0004672 protein kinase activity; GO:0016301 kinase activity; GO:0016303 1-phosphatidylinositol-3-kinase activity; GO:0016740 transferase activity; GO:0016772 transferase activity, transferring phosphorus-containing groups; GO:0016773 phosphotransferase activity, alcohol group as acceptor; GO:0052742 phosphatidylinositol kinase activity; GO:0140096 catalytic activ…	PF00792	PF00792 Phosphoinositide 3-kinase C2	TU	KOG0906	Phosphatidylinositol 3-kinase VPS34, involved in signal transduction
B9EKI3	TATA element modulatory factor OS=Mus musculus OX=10090 GN=Tmf1 PE=1 SV=2	Tmf1	0.648026	0.0115195	Down	1.74	2	2	2	129520	165999	146495	107905	92563.4	85968.3	1.06681	1.36728	1.20663	0.888777	0.762413	0.708092	nucleus	K20286			GO:0000003 reproduction; GO:0001675 acrosome assembly; GO:0001817 regulation of cytokine production; GO:0001819 positive regulation of cytokine production; GO:0003006 developmental process involved in reproduction; GO:0003008 system process; GO:0006139 nucleobase-containing compound metabolic process; GO:0006351 DNA-templated transcription; GO:0006355 regulation of DNA-templated transcription; GO…	GO:0000139 Golgi membrane; GO:0005622 intracellular anatomical structure; GO:0005634 nucleus; GO:0005737 cytoplasm; GO:0005783 endoplasmic reticulum; GO:0005794 Golgi apparatus; GO:0005829 cytosol; GO:0012505 endomembrane system; GO:0016020 membrane; GO:0031090 organelle membrane; GO:0031984 organelle subcompartment; GO:0043226 organelle; GO:0043227 membrane-bounded organelle; GO:0043229 intracel…	GO:0003712 transcription coregulator activity; GO:0005488 binding; GO:0005515 protein binding; GO:0019899 enzyme binding; GO:0031267 small GTPase binding; GO:0051020 GTPase binding; GO:0140110 transcription regulator activity;			K	KOG4673	Transcription factor TMF, TATA element modulatory factor
Q3TLP5	Enoyl-CoA hydratase domain-containing protein 2, mitochondrial OS=Mus musculus OX=10090 GN=Echdc2 PE=1 SV=2	Echdc2	0.650982	0.0273203	Down	9.46	2	2	2	283766	349525	282791	184639	169531	242183	1.12573	1.38661	1.12186	0.732484	0.672549	0.960767	mitochondria				GO:0000288 nuclear-transcribed mRNA catabolic process, deadenylation-dependent decay; GO:0000956 nuclear-transcribed mRNA catabolic process; GO:0006082 organic acid metabolic process; GO:0006139 nucleobase-containing compound metabolic process; GO:0006401 RNA catabolic process; GO:0006402 mRNA catabolic process; GO:0006629 lipid metabolic process; GO:0006631 fatty acid metabolic process; GO:00066…	GO:0005622 intracellular anatomical structure; GO:0005737 cytoplasm; GO:0005739 mitochondrion; GO:0043226 organelle; GO:0043227 membrane-bounded organelle; GO:0043229 intracellular organelle; GO:0043231 intracellular membrane-bounded organelle;	GO:0003676 nucleic acid binding; GO:0003723 RNA binding; GO:0003729 mRNA binding; GO:0003730 mRNA 3'-UTR binding; GO:0003824 catalytic activity; GO:0004300 enoyl-CoA hydratase activity; GO:0004490 methylglutaconyl-CoA hydratase activity; GO:0005488 binding; GO:0016829 lyase activity; GO:0016835 carbon-oxygen lyase activity; GO:0016836 hydro-lyase activity; GO:0097159 organic cyclic compound bindi…	PF00378	PF00378 Enoyl-CoA hydratase/isomerase	I	KOG1679	Enoyl-CoA hydratase
Q99JG3	Annexin A13 OS=Mus musculus OX=10090 GN=Anxa13 PE=1 SV=3	Anxa13	0.651197	0.0147531	Down	25.55	6	6	6	3915900	3696960	2934360	2119850	2534420	2214050	1.34911	1.27368	1.01095	0.73033	0.873158	0.762784	cytoplasm	K17099			GO:0009987 cellular process; GO:0030154 cell differentiation; GO:0032502 developmental process; GO:0032879 regulation of localization; GO:0032880 regulation of protein localization; GO:0042996 regulation of Golgi to plasma membrane protein transport; GO:0042997 negative regulation of Golgi to plasma membrane protein transport; GO:0042998 positive regulation of Golgi to plasma membrane protein tra…	GO:0005622 intracellular anatomical structure; GO:0005634 nucleus; GO:0005654 nucleoplasm; GO:0005737 cytoplasm; GO:0005886 plasma membrane; GO:0012505 endomembrane system; GO:0016020 membrane; GO:0016323 basolateral plasma membrane; GO:0016324 apical plasma membrane; GO:0030133 transport vesicle; GO:0031410 cytoplasmic vesicle; GO:0031974 membrane-enclosed lumen; GO:0031981 nuclear lumen; GO:003…	GO:0001786 phosphatidylserine binding; GO:0005488 binding; GO:0005543 phospholipid binding; GO:0008289 lipid binding; GO:0043167 ion binding; GO:0043168 anion binding; GO:0072341 modified amino acid binding; GO:1901611 phosphatidylglycerol binding;	PF00191	PF00191 Annexin	U	KOG0819	Annexin
Q6PHZ2	Calcium/calmodulin-dependent protein kinase type II subunit delta OS=Mus musculus OX=10090 GN=Camk2d PE=1 SV=1	Camk2d	0.654024	0.0422087	Down	3.61	2	2	2	450542	525701	568944	429782	299447	281360	1.0577	1.23415	1.33567	1.00897	0.702989	0.660527	cytoplasm	K04515	CAMK2; calcium/calmodulin-dependent protein kinase (CaM kinase) II [EC:2.7.11.17]	mmu04012 ErbB signaling pathway; mmu05417 Lipid and atherosclerosis; mmu04020 Calcium signaling pathway; mmu04916 Melanogenesis; mmu04148 Efferocytosis; mmu05205 Proteoglycans in cancer; mmu04740 Olfactory transduction; mmu05012 Parkinson disease; mmu04310 Wnt signaling pathway; mmu05031 Amphetamine addiction; mmu05152 Tuberculosis; mmu04911 Insulin secretion; mmu04360 Axon guidance; mmu04217 Nec…	GO:0000003 reproduction; GO:0000082 G1/S transition of mitotic cell cycle; GO:0000165 MAPK cascade; GO:0000278 mitotic cell cycle; GO:0001558 regulation of cell growth; GO:0001666 response to hypoxia; GO:0001932 regulation of protein phosphorylation; GO:0001934 positive regulation of protein phosphorylation; GO:0002026 regulation of the force of heart contraction; GO:0002027 regulation of heart r…	GO:0005622 intracellular anatomical structure; GO:0005634 nucleus; GO:0005654 nucleoplasm; GO:0005737 cytoplasm; GO:0005783 endoplasmic reticulum; GO:0005829 cytosol; GO:0005886 plasma membrane; GO:0005911 cell-cell junction; GO:0005954 calcium- and calmodulin-dependent protein kinase complex; GO:0012505 endomembrane system; GO:0012506 vesicle membrane; GO:0014704 intercalated disc; GO:0016020 me…	GO:0003824 catalytic activity; GO:0004672 protein kinase activity; GO:0004674 protein serine/threonine kinase activity; GO:0004683 calmodulin-dependent protein kinase activity; GO:0005085 guanyl-nucleotide exchange factor activity; GO:0005488 binding; GO:0005515 protein binding; GO:0005516 calmodulin binding; GO:0008092 cytoskeletal protein binding; GO:0008200 ion channel inhibitor activity; GO:0…	PF00069; PF08332	PF00069 Protein kinase domain; PF08332 Calcium/calmodulin dependent protein kinase II association domain	T	KOG0033	Ca2+/calmodulin-dependent protein kinase, EF-Hand protein superfamily
Q9D0B0	Serine/arginine-rich splicing factor 9 OS=Mus musculus OX=10090 GN=Srsf9 PE=1 SV=1	Srsf9	0.654855	0.0111769	Down	23.87	5	5	5	454598	479885	481873	342809	330980	253719	1.16371	1.22845	1.23353	0.877548	0.847268	0.649489	nucleus	K21123	SRSF9; serine/arginine-rich splicing factor 9	mmu03040 Spliceosome; mmu05168 Herpes simplex virus 1 infection	GO:0000245 spliceosomal complex assembly; GO:0000375 RNA splicing, via transesterification reactions; GO:0000377 RNA splicing, via transesterification reactions with bulged adenosine as nucleophile; GO:0000398 mRNA splicing, via spliceosome; GO:0006139 nucleobase-containing compound metabolic process; GO:0006376 mRNA splice site recognition; GO:0006396 RNA processing; GO:0006397 mRNA processing; …	GO:0005622 intracellular anatomical structure; GO:0005634 nucleus; GO:0005654 nucleoplasm; GO:0005730 nucleolus; GO:0031974 membrane-enclosed lumen; GO:0031981 nuclear lumen; GO:0043226 organelle; GO:0043227 membrane-bounded organelle; GO:0043228 non-membrane-bounded organelle; GO:0043229 intracellular organelle; GO:0043231 intracellular membrane-bounded organelle; GO:0043232 intracellular non-me…	GO:0005488 binding; GO:0005515 protein binding; GO:0019904 protein domain specific binding;	PF00076	PF00076 RNA recognition motif. (a.k.a. RRM, RBD, or RNP domain)	A	KOG0105	Alternative splicing factor ASF/SF2 (RRM superfamily)
Q8CGY8	UDP-N-acetylglucosamine--peptide N-acetylglucosaminyltransferase 110 kDa subunit OS=Mus musculus OX=10090 GN=Ogt PE=1 SV=2	Ogt	0.655841	0.034215	Down	2.2	2	2	2	147967	177898	138036	124563	85532.3	94150	1.15577	1.38956	1.0782	0.972963	0.668094	0.735407	cytoplasm	K09667	OGT; protein O-GlcNAc transferase [EC:2.4.1.255]	mmu03083 Polycomb repressive complex; mmu00514 Other types of O-glycan biosynthesis; mmu04931 Insulin resistance	GO:0000003 reproduction; GO:0001678 intracellular glucose homeostasis; GO:0001932 regulation of protein phosphorylation; GO:0001933 negative regulation of protein phosphorylation; GO:0001934 positive regulation of protein phosphorylation; GO:0002119 nematode larval development; GO:0002164 larval development; GO:0002237 response to molecule of bacterial origin; GO:0005975 carbohydrate metabolic pr…	GO:0000123 histone acetyltransferase complex; GO:0000785 chromatin; GO:0000791 euchromatin; GO:0005622 intracellular anatomical structure; GO:0005634 nucleus; GO:0005654 nucleoplasm; GO:0005694 chromosome; GO:0005737 cytoplasm; GO:0005739 mitochondrion; GO:0005829 cytosol; GO:0005886 plasma membrane; GO:0012505 endomembrane system; GO:0016020 membrane; GO:0030141 secretory granule; GO:0031248 pro…	GO:0003824 catalytic activity; GO:0004721 phosphoprotein phosphatase activity; GO:0004722 protein serine/threonine phosphatase activity; GO:0005488 binding; GO:0005515 protein binding; GO:0005543 phospholipid binding; GO:0005547 phosphatidylinositol-3,4,5-trisphosphate binding; GO:0008080 N-acetyltransferase activity; GO:0008134 transcription factor binding; GO:0008194 UDP-glycosyltransferase act…			GOT	KOG4626	O-linked N-acetylglucosamine transferase OGT
P32067	Lupus La protein homolog OS=Mus musculus OX=10090 GN=Ssb PE=1 SV=1	Ssb	0.656137	0.0200464	Down	9.64	4	4	4	206504	294510	244196	169058	150136	169766	1.00393	1.43178	1.18718	0.821887	0.729896	0.825329	nucleus	K11090	LA; lupus La protein	mmu05322 Systemic lupus erythematosus	GO:0000956 nuclear-transcribed mRNA catabolic process; GO:0000966 RNA 5'-end processing; GO:0001682 tRNA 5'-leader removal; GO:0006139 nucleobase-containing compound metabolic process; GO:0006396 RNA processing; GO:0006399 tRNA metabolic process; GO:0006400 tRNA modification; GO:0006401 RNA catabolic process; GO:0006402 mRNA catabolic process; GO:0006403 RNA localization; GO:0006405 RNA export fr…	GO:0000785 chromatin; GO:0000791 euchromatin; GO:0005622 intracellular anatomical structure; GO:0005634 nucleus; GO:0005694 chromosome; GO:0005737 cytoplasm; GO:0032991 protein-containing complex; GO:0043226 organelle; GO:0043227 membrane-bounded organelle; GO:0043228 non-membrane-bounded organelle; GO:0043229 intracellular organelle; GO:0043231 intracellular membrane-bounded organelle; GO:004323…	GO:0000049 tRNA binding; GO:0003676 nucleic acid binding; GO:0003723 RNA binding; GO:0003727 single-stranded RNA binding; GO:0003729 mRNA binding; GO:0005488 binding; GO:0008097 5S rRNA binding; GO:0008098 5S rRNA primary transcript binding; GO:0008187 poly-pyrimidine tract binding; GO:0008266 poly(U) RNA binding; GO:0019843 rRNA binding; GO:0097159 organic cyclic compound binding; GO:1901363 het…	PF05383; PF00076; PF08777	PF05383 La domain; PF00076 RNA recognition motif. (a.k.a. RRM, RBD, or RNP domain); PF08777 RNA binding motif	A	KOG4213	RNA-binding protein La
P26369	Splicing factor U2AF 65 kDa subunit OS=Mus musculus OX=10090 GN=U2af2 PE=1 SV=3	U2af2	0.656264	0.0180324	Down	5.68	3	3	3	374203	523693	409579	306661	273913	277475	1.0368	1.45099	1.13482	0.849663	0.758929	0.768798	nucleus	K12837	U2AF2; splicing factor U2AF 65 kDa subunit	mmu03040 Spliceosome	GO:0000003 reproduction; GO:0000245 spliceosomal complex assembly; GO:0000375 RNA splicing, via transesterification reactions; GO:0000377 RNA splicing, via transesterification reactions with bulged adenosine as nucleophile; GO:0000381 regulation of alternative mRNA splicing, via spliceosome; GO:0000389 mRNA 3'-splice site recognition; GO:0000398 mRNA splicing, via spliceosome; GO:0002119 nematode…	GO:0000243 commitment complex; GO:0005622 intracellular anatomical structure; GO:0005634 nucleus; GO:0005654 nucleoplasm; GO:0005681 spliceosomal complex; GO:0005684 U2-type spliceosomal complex; GO:0016604 nuclear body; GO:0016607 nuclear speck; GO:0031974 membrane-enclosed lumen; GO:0031981 nuclear lumen; GO:0032991 protein-containing complex; GO:0043226 organelle; GO:0043227 membrane-bounded o…	GO:0003676 nucleic acid binding; GO:0003723 RNA binding; GO:0003727 single-stranded RNA binding; GO:0003729 mRNA binding; GO:0005488 binding; GO:0005515 protein binding; GO:0008187 poly-pyrimidine tract binding; GO:0019899 enzyme binding; GO:0019904 protein domain specific binding; GO:0030628 pre-mRNA 3'-splice site binding; GO:0036002 pre-mRNA binding; GO:0070742 C2H2 zinc finger domain binding;…	PF00076	PF00076 RNA recognition motif. (a.k.a. RRM, RBD, or RNP domain)	A	KOG0120	Splicing factor U2AF, large subunit (RRM superfamily)
Q8CFG0	Extracellular sulfatase Sulf-2 OS=Mus musculus OX=10090 GN=Sulf2 PE=1 SV=2	Sulf2	0.656459	0.0409453	Down	2.17	2	2	2	338423	304558	254451	158604	192481	238042	1.36593	1.22925	1.02701	0.640152	0.776885	0.960777	extracellular	K14607			GO:0000902 cell morphogenesis; GO:0001501 skeletal system development; GO:0001502 cartilage condensation; GO:0001655 urogenital system development; GO:0001817 regulation of cytokine production; GO:0001819 positive regulation of cytokine production; GO:0001822 kidney development; GO:0001889 liver development; GO:0001936 regulation of endothelial cell proliferation; GO:0001937 negative regulation o…	GO:0005576 extracellular region; GO:0005615 extracellular space; GO:0005622 intracellular anatomical structure; GO:0005737 cytoplasm; GO:0005783 endoplasmic reticulum; GO:0005794 Golgi apparatus; GO:0005886 plasma membrane; GO:0009986 cell surface; GO:0012505 endomembrane system; GO:0016020 membrane; GO:0043226 organelle; GO:0043227 membrane-bounded organelle; GO:0043229 intracellular organelle; …	GO:0003824 catalytic activity; GO:0004065 arylsulfatase activity; GO:0008146 sulfotransferase activity; GO:0008449 N-acetylglucosamine-6-sulfatase activity; GO:0008484 sulfuric ester hydrolase activity; GO:0016740 transferase activity; GO:0016782 transferase activity, transferring sulphur-containing groups; GO:0016787 hydrolase activity; GO:0016788 hydrolase activity, acting on ester bonds; GO:00…			G	KOG3731	Sulfatases
Q9DAL3	Coiled-coil domain-containing protein 54 OS=Mus musculus OX=10090 GN=Ccdc54 PE=2 SV=1	Ccdc54	0.657676	0.000523154	Down	9.12	3	3	3	244413	212663	230188	148839	150437	152721	1.28722	1.12	1.2123	0.783871	0.792287	0.804316	mitochondria
Q9JIQ3	Diablo IAP-binding mitochondrial protein OS=Mus musculus OX=10090 GN=Diablo PE=1 SV=2	Diablo	0.658652	0.0409773	Down	11.39	2	2	2	123884	126054	104461	61689.3	74447.5	97288.9	1.2645	1.28665	1.06625	0.62967	0.759895	0.99304	mitochondria	K10522	DIABLO; diablo	mmu04210 Apoptosis; mmu04215 Apoptosis - multiple species	GO:0006915 apoptotic process; GO:0006919 activation of cysteine-type endopeptidase activity involved in apoptotic process; GO:0006950 response to stress; GO:0006979 response to oxidative stress; GO:0007154 cell communication; GO:0007165 signal transduction; GO:0007166 cell surface receptor signaling pathway; GO:0008219 cell death; GO:0008625 extrinsic apoptotic signaling pathway via death domain …	GO:0005622 intracellular anatomical structure; GO:0005737 cytoplasm; GO:0005739 mitochondrion; GO:0005740 mitochondrial envelope; GO:0005758 mitochondrial intermembrane space; GO:0005829 cytosol; GO:0005886 plasma membrane; GO:0009898 cytoplasmic side of plasma membrane; GO:0016020 membrane; GO:0031967 organelle envelope; GO:0031970 organelle envelope lumen; GO:0031974 membrane-enclosed lumen; GO…		PF09057	PF09057 Second Mitochondria-derived Activator of Caspases
Q9D498	IQ domain-containing protein F3 OS=Mus musculus OX=10090 GN=Iqcf3 PE=2 SV=1	Iqcf3	0.661753	0.0170312	Down	7.88	1	1	1	247731	268517	214751	159287	163207		1.17576	1.27441	1.01923	0.755995	0.774599		cytoplasm	K24840
Q91W86	Vacuolar protein sorting-associated protein 11 homolog OS=Mus musculus OX=10090 GN=Vps11 PE=1 SV=3	Vps11	0.661923	0.0161776	Down	2.55	2	2	2	89652.6	108306	119620	78247.1	67023.9	64941.6	1.01918	1.23124	1.35986	0.889523	0.761937	0.738265	cytoplasm	K20179	VPS11; vacuolar protein sorting-associated protein 11	mmu04148 Efferocytosis; mmu04140 Autophagy - animal; mmu05132 Salmonella infection	GO:0006325 chromatin organization; GO:0006807 nitrogen compound metabolic process; GO:0006810 transport; GO:0006887 exocytosis; GO:0006904 vesicle docking involved in exocytosis; GO:0006906 vesicle fusion; GO:0006914 autophagy; GO:0006950 response to stress; GO:0006996 organelle organization; GO:0007032 endosome organization; GO:0007033 vacuole organization; GO:0007034 vacuolar transport; GO:0007…	GO:0000323 lytic vacuole; GO:0005622 intracellular anatomical structure; GO:0005737 cytoplasm; GO:0005764 lysosome; GO:0005768 endosome; GO:0005769 early endosome; GO:0005770 late endosome; GO:0005773 vacuole; GO:0005856 cytoskeleton; GO:0005884 actin filament; GO:0012505 endomembrane system; GO:0015629 actin cytoskeleton; GO:0016020 membrane; GO:0030139 endocytic vesicle; GO:0030897 HOPS complex…	GO:0000149 SNARE binding; GO:0003824 catalytic activity; GO:0004842 ubiquitin-protein transferase activity; GO:0005488 binding; GO:0005515 protein binding; GO:0008270 zinc ion binding; GO:0016740 transferase activity; GO:0019787 ubiquitin-like protein transferase activity; GO:0019904 protein domain specific binding; GO:0019905 syntaxin binding; GO:0030674 protein-macromolecule adaptor activity; G…	PF13923	PF13923 Zinc finger, C3HC4 type (RING finger)	U	KOG2114	Vacuolar assembly/sorting protein PEP5/VPS11
Q8CHH9	Septin-8 OS=Mus musculus OX=10090 GN=Septin8 PE=1 SV=4	Septin8	0.663697	0.0365736	Down	2.1	1	1	1	224328	198343	233598	132834	183155	119575	1.23276	1.08996	1.2837	0.729969	1.0065	0.657106	cytoplasm	K16939	SEPT6_8_11; septin 6/8/11	mmu05100 Bacterial invasion of epithelial cells	GO:0000003 reproduction; GO:0000278 mitotic cell cycle; GO:0000281 mitotic cytokinesis; GO:0000910 cytokinesis; GO:0003006 developmental process involved in reproduction; GO:0007049 cell cycle; GO:0007275 multicellular organism development; GO:0007276 gamete generation; GO:0007281 germ cell development; GO:0007292 female gamete generation; GO:0007295 growth of a germarium-derived egg chamber; GO:…	GO:0005622 intracellular anatomical structure; GO:0005737 cytoplasm; GO:0005856 cytoskeleton; GO:0005886 plasma membrane; GO:0005938 cell cortex; GO:0005940 septin ring; GO:0016020 membrane; GO:0030424 axon; GO:0030425 dendrite; GO:0030496 midbody; GO:0031105 septin complex; GO:0032153 cell division site; GO:0032154 cleavage furrow; GO:0032156 septin cytoskeleton; GO:0032991 protein-containing co…	GO:0003824 catalytic activity; GO:0003924 GTPase activity; GO:0005488 binding; GO:0005515 protein binding; GO:0016462 pyrophosphatase activity; GO:0016787 hydrolase activity; GO:0016817 hydrolase activity, acting on acid anhydrides; GO:0016818 hydrolase activity, acting on acid anhydrides, in phosphorus-containing anhydrides; GO:0017111 ribonucleoside triphosphate phosphatase activity; GO:0042802…	PF00735	PF00735 Septin	D	KOG3859	Septins (P-loop GTPases)
Q9Z2Y3	Homer protein homolog 1 OS=Mus musculus OX=10090 GN=Homer1 PE=1 SV=2	Homer1	0.663773	0.00333167	Down	2.19	1	1	1	57264.3	56719.8	61754.7	43416.7	37861.6	35372.4	1.1751	1.16392	1.26724	0.890936	0.776942	0.725862	cytoplasm	K15010	HOMER; homer	mmu04724 Glutamatergic synapse; mmu04068 FoxO signaling pathway	GO:0001817 regulation of cytokine production; GO:0001818 negative regulation of cytokine production; GO:0001894 tissue homeostasis; GO:0003008 system process; GO:0003009 skeletal muscle contraction; GO:0003012 muscle system process; GO:0006936 muscle contraction; GO:0006941 striated muscle contraction; GO:0007154 cell communication; GO:0007165 signal transduction; GO:0007166 cell surface receptor…	GO:0005622 intracellular anatomical structure; GO:0005737 cytoplasm; GO:0005783 endoplasmic reticulum; GO:0005829 cytosol; GO:0005886 plasma membrane; GO:0012505 endomembrane system; GO:0014069 postsynaptic density; GO:0016020 membrane; GO:0030016 myofibril; GO:0030017 sarcomere; GO:0030018 Z disc; GO:0030424 axon; GO:0030425 dendrite; GO:0031674 I band; GO:0032279 asymmetric synapse; GO:0032420 …	GO:0001664 G protein-coupled receptor binding; GO:0005102 signaling receptor binding; GO:0005198 structural molecule activity; GO:0005488 binding; GO:0005515 protein binding; GO:0019904 protein domain specific binding; GO:0031802 type 5 metabotropic glutamate receptor binding; GO:0035254 glutamate receptor binding; GO:0035256 G protein-coupled glutamate receptor binding; GO:0035591 signaling adap…	PF00568	PF00568 WH1 domain
Q69Z99	Zinc finger protein 512 OS=Mus musculus OX=10090 GN=Znf512 PE=2 SV=2	Znf512	0.663874	0.0256209	Down	2.31	1	1	1	144362	147090	120979	110775	80119.6	82907.7	1.26221	1.28606	1.05777	0.968548	0.700516	0.724894	nucleus				GO:0006355 regulation of DNA-templated transcription; GO:0006357 regulation of transcription by RNA polymerase II; GO:0009889 regulation of biosynthetic process; GO:0010468 regulation of gene expression; GO:0010556 regulation of macromolecule biosynthetic process; GO:0019219 regulation of nucleobase-containing compound metabolic process; GO:0019222 regulation of metabolic process; GO:0031323 regu…	GO:0005622 intracellular anatomical structure; GO:0005634 nucleus; GO:0043226 organelle; GO:0043227 membrane-bounded organelle; GO:0043229 intracellular organelle; GO:0043231 intracellular membrane-bounded organelle;	GO:0000981 DNA-binding transcription factor activity, RNA polymerase II-specific; GO:0003700 DNA-binding transcription factor activity; GO:0140110 transcription regulator activity;	PF00096	PF00096 Zinc finger, C2H2 type	R	KOG1721	FOG: Zn-finger
Q3UVG3	Protein FAM91A1 OS=Mus musculus OX=10090 GN=Fam91a1 PE=1 SV=1	Fam91a1	0.664297	0.016151	Down	4.06	3	3	3	160032	165729	148849	123564	87503.2	104215	1.2156	1.25887	1.13065	0.938589	0.664672	0.791614	cytoplasm					GO:0005622 intracellular anatomical structure; GO:0005737 cytoplasm; GO:0005794 Golgi apparatus; GO:0005802 trans-Golgi network; GO:0012505 endomembrane system; GO:0031984 organelle subcompartment; GO:0043226 organelle; GO:0043227 membrane-bounded organelle; GO:0043229 intracellular organelle; GO:0043231 intracellular membrane-bounded organelle; GO:0098791 Golgi apparatus subcompartment;				S	KOG3707	Uncharacterized conserved protein
Q91Z31	Polypyrimidine tract-binding protein 2 OS=Mus musculus OX=10090 GN=Ptbp2 PE=1 SV=2	Ptbp2	0.664556	0.0166985	Down	3.77	2	2	2	214849	239178	269313	161261	137606	181833	1.07064	1.19188	1.34205	0.8036	0.685721	0.906114	cytoplasm	K14948			GO:0000003 reproduction; GO:0000226 microtubule cytoskeleton organization; GO:0000245 spliceosomal complex assembly; GO:0000375 RNA splicing, via transesterification reactions; GO:0000377 RNA splicing, via transesterification reactions with bulged adenosine as nucleophile; GO:0000398 mRNA splicing, via spliceosome; GO:0002009 morphogenesis of an epithelium; GO:0002165 instar larval or pupal devel…	GO:0005622 intracellular anatomical structure; GO:0005634 nucleus; GO:0005681 spliceosomal complex; GO:0005737 cytoplasm; GO:0030424 axon; GO:0030426 growth cone; GO:0030427 site of polarized growth; GO:0032991 protein-containing complex; GO:0036477 somatodendritic compartment; GO:0042995 cell projection; GO:0043005 neuron projection; GO:0043025 neuronal cell body; GO:0043226 organelle; GO:004322…	GO:0000900 mRNA regulatory element binding translation repressor activity; GO:0003676 nucleic acid binding; GO:0003723 RNA binding; GO:0003729 mRNA binding; GO:0003730 mRNA 3'-UTR binding; GO:0005488 binding; GO:0030371 translation repressor activity; GO:0036002 pre-mRNA binding; GO:0045182 translation regulator activity; GO:0090079 translation regulator activity, nucleic acid binding; GO:0097159…	PF11835; PF13893; PF00076	PF11835 RRM-like domain; PF13893 RNA recognition motif. (a.k.a. RRM, RBD, or RNP domain); PF00076 RNA recognition motif. (a.k.a. RRM, RBD, or RNP domain)	A	KOG1190	Polypyrimidine tract-binding protein
Q8BU33	2-hydroxyacyl-CoA lyase 2 OS=Mus musculus OX=10090 GN=Ilvbl PE=1 SV=1	Ilvbl	0.664864	0.00754177	Down	7.12	3	3	3	416922	406388	363720	253672	299755	235787	1.2658	1.23382	1.10428	0.770164	0.910075	0.715864	plasma membrane	K11259			GO:0001501 skeletal system development; GO:0007275 multicellular organism development; GO:0009653 anatomical structure morphogenesis; GO:0009790 embryo development; GO:0009792 embryo development ending in birth or egg hatching; GO:0009887 animal organ morphogenesis; GO:0032501 multicellular organismal process; GO:0032502 developmental process; GO:0043009 chordate embryonic development; GO:0048513…	GO:0016020 membrane;		PF02776; PF00205; PF02775	PF02776 Thiamine pyrophosphate enzyme, N-terminal TPP binding domain; PF00205 Thiamine pyrophosphate enzyme, central domain; PF02775 Thiamine pyrophosphate enzyme, C-terminal TPP binding domain	EH	KOG1185	Thiamine pyrophosphate-requiring enzyme
F8VQ03	A disintegrin and metallopeptidase domain 3 OS=Mus musculus OX=10090 GN=Adam3 PE=1 SV=1	Adam3	0.664981	0.0491205	Down	7.3	4	4	4	459483	380650	376402	209722	262634	336617	1.36109	1.12757	1.11499	0.621243	0.77798	0.997134	plasma membrane				GO:0000003 reproduction; GO:0007338 single fertilization; GO:0007339 binding of sperm to zona pellucida; GO:0008037 cell recognition; GO:0009566 fertilization; GO:0009893 positive regulation of metabolic process; GO:0009987 cellular process; GO:0009988 cell-cell recognition; GO:0010468 regulation of gene expression; GO:0010604 positive regulation of macromolecule metabolic process; GO:0010628 pos…	GO:0005886 plasma membrane; GO:0009986 cell surface; GO:0016020 membrane; GO:0032991 protein-containing complex; GO:0045121 membrane raft; GO:0061827 sperm head; GO:0071944 cell periphery; GO:0098857 membrane microdomain;		PF01421; PF00200; PF07974	PF01421 Reprolysin (M12B) family zinc metalloprotease ; PF00200 Disintegrin; PF07974 EGF-like domain	O	KOG3607	Meltrins, fertilins and related Zn-dependent metalloproteinases of the ADAMs family
Q9EPU0	Regulator of nonsense transcripts 1 OS=Mus musculus OX=10090 GN=Upf1 PE=1 SV=2	Upf1	0.665049	0.00173803	Down	12.9	13	13	13	869587	1003250	953812	671530	604135	604194	1.10858	1.27897	1.21595	0.856087	0.77017	0.770245	cytoplasm	K14326	UPF1; regulator of nonsense transcripts 1 [EC:3.6.4.13 5.6.2.3]	mmu03013 Nucleocytoplasmic transport; mmu03015 mRNA surveillance pathway	GO:0000003 reproduction; GO:0000184 nuclear-transcribed mRNA catabolic process, nonsense-mediated decay; GO:0000294 nuclear-transcribed mRNA catabolic process, RNase MRP-dependent; GO:0000723 telomere maintenance; GO:0000956 nuclear-transcribed mRNA catabolic process; GO:0001666 response to hypoxia; GO:0002237 response to molecule of bacterial origin; GO:0003006 developmental process involved in …	GO:0000228 nuclear chromosome; GO:0000781 chromosome, telomeric region; GO:0000785 chromatin; GO:0000932 P-body; GO:0005622 intracellular anatomical structure; GO:0005634 nucleus; GO:0005654 nucleoplasm; GO:0005681 spliceosomal complex; GO:0005694 chromosome; GO:0005737 cytoplasm; GO:0005829 cytosol; GO:0031974 membrane-enclosed lumen; GO:0031981 nuclear lumen; GO:0032991 protein-containing compl…	GO:0003676 nucleic acid binding; GO:0003677 DNA binding; GO:0003682 chromatin binding; GO:0003724 RNA helicase activity; GO:0003824 catalytic activity; GO:0004386 helicase activity; GO:0005488 binding; GO:0005515 protein binding; GO:0008186 ATP-dependent activity, acting on RNA; GO:0016462 pyrophosphatase activity; GO:0016787 hydrolase activity; GO:0016817 hydrolase activity, acting on acid anhyd…	PF09416; PF18141; PF13086; PF13087	PF09416 RNA helicase (UPF2 interacting domain); PF18141 RNA helicase UPF1, 1B domain; PF13086 AAA domain; PF13087 AAA domain	A	KOG1802	RNA helicase nonsense mRNA reducing factor (pNORF1)
P61255	Large ribosomal subunit protein uL24 OS=Mus musculus OX=10090 GN=Rpl26 PE=1 SV=1	Rpl26	0.665162	0.012653	Down	11.72	2	2	2	1565910	1793550	2086870	1301870	1201030	1119790	1.036	1.1866	1.38066	0.861308	0.794593	0.740845	nucleus	K02898	RP-L26e; large subunit ribosomal protein L26e	mmu03010 Ribosome; mmu05171 Coronavirus disease - COVID-19	GO:0000075 cell cycle checkpoint signaling; GO:0000077 DNA damage checkpoint signaling; GO:0000184 nuclear-transcribed mRNA catabolic process, nonsense-mediated decay; GO:0000278 mitotic cell cycle; GO:0000956 nuclear-transcribed mRNA catabolic process; GO:0002181 cytoplasmic translation; GO:0006139 nucleobase-containing compound metabolic process; GO:0006364 rRNA processing; GO:0006396 RNA proce…	GO:0005622 intracellular anatomical structure; GO:0005634 nucleus; GO:0005654 nucleoplasm; GO:0005730 nucleolus; GO:0005737 cytoplasm; GO:0005829 cytosol; GO:0005840 ribosome; GO:0015934 large ribosomal subunit; GO:0022625 cytosolic large ribosomal subunit; GO:0022626 cytosolic ribosome; GO:0030424 axon; GO:0031974 membrane-enclosed lumen; GO:0031981 nuclear lumen; GO:0032991 protein-containing c…	GO:0003676 nucleic acid binding; GO:0003723 RNA binding; GO:0003729 mRNA binding; GO:0003735 structural constituent of ribosome; GO:0005198 structural molecule activity; GO:0005488 binding; GO:0048027 mRNA 5'-UTR binding; GO:0097159 organic cyclic compound binding; GO:1901363 heterocyclic compound binding;			J	KOG3401	60S ribosomal protein L26
Q61656	Probable ATP-dependent RNA helicase DDX5 OS=Mus musculus OX=10090 GN=Ddx5 PE=1 SV=2	Ddx5	0.665464	0.0447814	Down	24.27	14	14	13	2472490	3373260	2918350	2279590	1991400	1561200	1.01635	1.38662	1.19963	0.937056	0.818592	0.641752	nucleus	K12823	DDX5; ATP-dependent RNA helicase DDX5/DBP2 [EC:3.6.4.13]	mmu03040 Spliceosome; mmu05205 Proteoglycans in cancer; mmu05202 Transcriptional misregulation in cancer	GO:0000122 negative regulation of transcription by RNA polymerase II; GO:0000375 RNA splicing, via transesterification reactions; GO:0000377 RNA splicing, via transesterification reactions with bulged adenosine as nucleophile; GO:0000380 alternative mRNA splicing, via spliceosome; GO:0000381 regulation of alternative mRNA splicing, via spliceosome; GO:0000398 mRNA splicing, via spliceosome; GO:00…	GO:0005622 intracellular anatomical structure; GO:0005634 nucleus; GO:0005654 nucleoplasm; GO:0005681 spliceosomal complex; GO:0005694 chromosome; GO:0005700 polytene chromosome; GO:0005703 polytene chromosome puff; GO:0005730 nucleolus; GO:0005737 cytoplasm; GO:0016604 nuclear body; GO:0016607 nuclear speck; GO:0031974 membrane-enclosed lumen; GO:0031981 nuclear lumen; GO:0032991 protein-contain…	GO:0003676 nucleic acid binding; GO:0003682 chromatin binding; GO:0003712 transcription coregulator activity; GO:0003713 transcription coactivator activity; GO:0003723 RNA binding; GO:0003724 RNA helicase activity; GO:0003729 mRNA binding; GO:0003730 mRNA 3'-UTR binding; GO:0003824 catalytic activity; GO:0004386 helicase activity; GO:0005102 signaling receptor binding; GO:0005488 binding; GO:0005…	PF00270; PF00271	PF00270 DEAD/DEAH box helicase; PF00271 Helicase conserved C-terminal domain	A	KOG0331	ATP-dependent RNA helicase
Q8VEE4	Replication protein A 70 kDa DNA-binding subunit OS=Mus musculus OX=10090 GN=Rpa1 PE=1 SV=1	Rpa1	0.666626	0.0271466	Down	3.21	2	2	2	156108	190740	169167	140277	102001	101711	1.08912	1.33074	1.18023	0.978672	0.711632	0.709608	cytoplasm	K07466	RFA1; replication factor A1	mmu03430 Mismatch repair; mmu03030 DNA replication; mmu03440 Homologous recombination; mmu03460 Fanconi anemia pathway; mmu03420 Nucleotide excision repair	GO:0000003 reproduction; GO:0000082 G1/S transition of mitotic cell cycle; GO:0000278 mitotic cell cycle; GO:0000723 telomere maintenance; GO:0000724 double-strand break repair via homologous recombination; GO:0000725 recombinational repair; GO:0000731 DNA synthesis involved in DNA repair; GO:0001701 in utero embryonic development; GO:0001894 tissue homeostasis; GO:0002376 immune system process; …	GO:0000228 nuclear chromosome; GO:0000793 condensed chromosome; GO:0000794 condensed nuclear chromosome; GO:0000795 synaptonemal complex; GO:0000800 lateral element; GO:0001673 male germ cell nucleus; GO:0005622 intracellular anatomical structure; GO:0005634 nucleus; GO:0005654 nucleoplasm; GO:0005657 replication fork; GO:0005662 DNA replication factor A complex; GO:0005694 chromosome; GO:0016604…	GO:0003676 nucleic acid binding; GO:0003677 DNA binding; GO:0003682 chromatin binding; GO:0003684 damaged DNA binding; GO:0003690 double-stranded DNA binding; GO:0003697 single-stranded DNA binding; GO:0005488 binding; GO:0005515 protein binding; GO:0019899 enzyme binding; GO:0042162 telomeric DNA binding; GO:0043047 single-stranded telomeric DNA binding; GO:0043565 sequence-specific DNA binding;…	PF04057; PF01336; PF16900	PF04057 Replication factor-A protein 1, N-terminal domain; PF01336 OB-fold nucleic acid binding domain; PF16900 Replication protein A OB domain	L	KOG0851	Single-stranded DNA-binding replication protein A (RPA), large (70 kD) subunit and related ssDNA-binding proteins
Q9CRA7	ATP synthase subunit s, mitochondrial OS=Mus musculus OX=10090 GN=Dmac2l PE=1 SV=1	Dmac2l	1.50256	0.0434275	Up	15	3	3	3	2990320	2547510	4066620	4484810	5267490	4679000	0.746468	0.63593	1.01514	1.11953	1.31491	1.16801	extracellular	K07554			GO:0006139 nucleobase-containing compound metabolic process; GO:0006163 purine nucleotide metabolic process; GO:0006164 purine nucleotide biosynthetic process; GO:0006725 cellular aromatic compound metabolic process; GO:0006753 nucleoside phosphate metabolic process; GO:0006754 ATP biosynthetic process; GO:0006793 phosphorus metabolic process; GO:0006796 phosphate-containing compound metabolic pr…	GO:0000276 mitochondrial proton-transporting ATP synthase complex, coupling factor F(o); GO:0005622 intracellular anatomical structure; GO:0005737 cytoplasm; GO:0005739 mitochondrion; GO:0005740 mitochondrial envelope; GO:0005743 mitochondrial inner membrane; GO:0005753 mitochondrial proton-transporting ATP synthase complex; GO:0016020 membrane; GO:0016469 proton-transporting two-sector ATPase co…	GO:0005215 transporter activity; GO:0008324 monoatomic cation transmembrane transporter activity; GO:0015075 monoatomic ion transmembrane transporter activity; GO:0015078 proton transmembrane transporter activity; GO:0015318 inorganic molecular entity transmembrane transporter activity; GO:0022857 transmembrane transporter activity; GO:0022890 inorganic cation transmembrane transporter activity;			S	KOG3864	Uncharacterized conserved protein
Q9WV69	Dematin OS=Mus musculus OX=10090 GN=Dmtn PE=1 SV=1	Dmtn	1.54657	0.035074	Up	8.64	3	3	3	262477	199799	175950	280215	344617	362231	0.968974	0.737588	0.649546	1.03446	1.27221	1.33723	nucleus				GO:0001932 regulation of protein phosphorylation; GO:0001933 negative regulation of protein phosphorylation; GO:0001952 regulation of cell-matrix adhesion; GO:0001953 negative regulation of cell-matrix adhesion; GO:0002262 myeloid cell homeostasis; GO:0002376 immune system process; GO:0002520 immune system development; GO:0002576 platelet degranulation; GO:0002790 peptide secretion; GO:0006810 tr…	GO:0005622 intracellular anatomical structure; GO:0005737 cytoplasm; GO:0005829 cytosol; GO:0005856 cytoskeleton; GO:0005884 actin filament; GO:0005886 plasma membrane; GO:0005938 cell cortex; GO:0014069 postsynaptic density; GO:0014731 spectrin-associated cytoskeleton; GO:0015629 actin cytoskeleton; GO:0016020 membrane; GO:0030863 cortical cytoskeleton; GO:0031090 organelle membrane; GO:0031094 …	GO:0003779 actin binding; GO:0005102 signaling receptor binding; GO:0005488 binding; GO:0005515 protein binding; GO:0008092 cytoskeletal protein binding; GO:0030507 spectrin binding; GO:0043621 protein self-association;	PF02209	PF02209 Villin headpiece domain	TZ	KOG1044	Actin-binding LIM Zn-finger protein Limatin involved in axon guidance
P28651	Carbonic anhydrase-related protein OS=Mus musculus OX=10090 GN=Ca8 PE=1 SV=5	Ca8	1.64158	0.00899058	Up	4.81	1	1	1	84590.4	68151.9	89453.1	116057	141267	140260	0.793308	0.639144	0.838912	1.08841	1.32483	1.31539	cytoskeleton	K01672	CA; carbonic anhydrase [EC:4.2.1.1]	mmu00910 Nitrogen metabolism; mmu01100 Metabolic pathways	GO:0007154 cell communication; GO:0007165 signal transduction; GO:0009987 cellular process; GO:0023052 signaling; GO:0035556 intracellular signal transduction; GO:0048015 phosphatidylinositol-mediated signaling; GO:0050789 regulation of biological process; GO:0050794 regulation of cellular process; GO:0050896 response to stimulus; GO:0051716 cellular response to stimulus; GO:0065007 biological re…	GO:0005622 intracellular anatomical structure; GO:0005737 cytoplasm;	GO:0003824 catalytic activity; GO:0004089 carbonate dehydratase activity; GO:0016829 lyase activity; GO:0016835 carbon-oxygen lyase activity; GO:0016836 hydro-lyase activity;	PF00194	PF00194 Eukaryotic-type carbonic anhydrase	R	KOG0382	Carbonic anhydrase
Q8K4Z3	NAD(P)H-hydrate epimerase OS=Mus musculus OX=10090 GN=Naxe PE=1 SV=1	Naxe	1.68364	0.0317606	Up	6.38	1	1	1	155525	146091	214160	249812	263166	355402	0.674165	0.633271	0.928335	1.08288	1.14076	1.54059	mitochondria	K17759			GO:0006139 nucleobase-containing compound metabolic process; GO:0006725 cellular aromatic compound metabolic process; GO:0006734 NADH metabolic process; GO:0006739 NADP metabolic process; GO:0006753 nucleoside phosphate metabolic process; GO:0006793 phosphorus metabolic process; GO:0006796 phosphate-containing compound metabolic process; GO:0006807 nitrogen compound metabolic process; GO:0008152 …	GO:0005576 extracellular region; GO:0005615 extracellular space; GO:0005622 intracellular anatomical structure; GO:0005634 nucleus; GO:0005654 nucleoplasm; GO:0005737 cytoplasm; GO:0005739 mitochondrion; GO:0005759 mitochondrial matrix; GO:0005829 cytosol; GO:0005929 cilium; GO:0031974 membrane-enclosed lumen; GO:0031981 nuclear lumen; GO:0042995 cell projection; GO:0043226 organelle; GO:0043227 …	GO:0003824 catalytic activity; GO:0005488 binding; GO:0005515 protein binding; GO:0016853 isomerase activity; GO:0016854 racemase and epimerase activity; GO:0042802 identical protein binding; GO:0042803 protein homodimerization activity; GO:0046983 protein dimerization activity; GO:0052856 NADHX epimerase activity; GO:0052857 NADPHX epimerase activity;	PF03853	PF03853 YjeF-related protein N-terminus	S	KOG2585	Uncharacterized conserved protein
D3Z070	Putative uncharacterized protein C19orf81 homolog OS=Mus musculus OX=10090 PE=2 SV=2	--	1.82338	0.0015601	Up	10.71	2	2	2	192878	239182	211825	358762	423572	391711	0.636586	0.78941	0.699119	1.18408	1.39798	1.29283	cytoplasm,nucleus
Q9JJW0	Peroxisomal membrane protein 4 OS=Mus musculus OX=10090 GN=Pxmp4 PE=1 SV=3	Pxmp4	1.87166	0.0330707	Up	7.55	1	1	1	292381	344621	570235	687733	740462	831348	0.506027	0.59644	0.986913	1.19027	1.28153	1.43882	mitochondria	K13350	PXMP4; peroxisomal membrane protein 4	mmu04146 Peroxisome		GO:0005622 intracellular anatomical structure; GO:0005737 cytoplasm; GO:0005777 peroxisome; GO:0005778 peroxisomal membrane; GO:0016020 membrane; GO:0031090 organelle membrane; GO:0031903 microbody membrane; GO:0042579 microbody; GO:0043226 organelle; GO:0043227 membrane-bounded organelle; GO:0043229 intracellular organelle; GO:0043231 intracellular membrane-bounded organelle; GO:0098588 bounding…
P06683	Complement component C9 OS=Mus musculus OX=10090 GN=C9 PE=1 SV=2	C9	1.92169	0.00260897	Up	3.65	2	2	2	55405.2	50265.8	53840.8	121757	91576.4	93199.5	0.713303	0.647137	0.693163	1.56754	1.17898	1.19988	extracellular	K04000	C9; complement component 9	mmu05322 Systemic lupus erythematosus; mmu05171 Coronavirus disease - COVID-19; mmu05020 Prion disease; mmu04610 Complement and coagulation cascades; mmu04810 Regulation of actin cytoskeleton; mmu05146 Amoebiasis	GO:0001897 cytolysis by symbiont of host cells; GO:0001906 cell killing; GO:0001907 killing by symbiont of host cells; GO:0002673 regulation of acute inflammatory response; GO:0002682 regulation of immune system process; GO:0002697 regulation of immune effector process; GO:0002920 regulation of humoral immune response; GO:0006950 response to stress; GO:0007596 blood coagulation; GO:0007599 hemost…	GO:0005576 extracellular region; GO:0005579 membrane attack complex; GO:0005615 extracellular space; GO:0005622 intracellular anatomical structure; GO:0005737 cytoplasm; GO:0005829 cytosol; GO:0005886 plasma membrane; GO:0016020 membrane; GO:0032991 protein-containing complex; GO:0046930 pore complex; GO:0071944 cell periphery; GO:0098796 membrane protein complex; GO:0098797 plasma membrane prote…		PF00090; PF01823	PF00090 Thrombospondin type 1 domain; PF01823 MAC/Perforin domain
Q14AW5	Putative methyltransferase NSUN7 OS=Mus musculus OX=10090 GN=Nsun7 PE=2 SV=2	Nsun7	2.50716	0.000146695	Up	14.36	8	8	8	295224	359746	346383	797156	848547	864849	0.504383	0.614617	0.591787	1.36192	1.44972	1.47757	nucleus				GO:0006996 organelle organization; GO:0007005 mitochondrion organization; GO:0009987 cellular process; GO:0016043 cellular component organization; GO:0030317 flagellated sperm motility; GO:0030382 sperm mitochondrion organization; GO:0040011 locomotion; GO:0048870 cell motility; GO:0051179 localization; GO:0051674 localization of cell; GO:0071840 cellular component organization or biogenesis; GO:…					D	KOG2360	Proliferation-associated nucleolar protein (NOL1)
Q9QUT0	Ammonium transporter Rh type A OS=Mus musculus OX=10090 GN=Rhag PE=1 SV=1	Rhag	2.57666	0.0111356	Up	2.05	1	1	1	126442	111737	74065.8	209783	255880	338887	0.679312	0.600309	0.39792	1.12706	1.37472	1.82068	plasma membrane	K06580			GO:0002262 myeloid cell homeostasis; GO:0002376 immune system process; GO:0002520 immune system development; GO:0006810 transport; GO:0006811 monoatomic ion transport; GO:0006812 monoatomic cation transport; GO:0006820 monoatomic anion transport; GO:0006855 xenobiotic transmembrane transport; GO:0006873 intracellular monoatomic ion homeostasis; GO:0006885 regulation of pH; GO:0007275 multicellula…	GO:0005622 intracellular anatomical structure; GO:0005737 cytoplasm; GO:0005856 cytoskeleton; GO:0005886 plasma membrane; GO:0009925 basal plasma membrane; GO:0014731 spectrin-associated cytoskeleton; GO:0016020 membrane; GO:0016323 basolateral plasma membrane; GO:0016324 apical plasma membrane; GO:0031410 cytoplasmic vesicle; GO:0031982 vesicle; GO:0043226 organelle; GO:0043227 membrane-bounded …	GO:0005215 transporter activity; GO:0005488 binding; GO:0005515 protein binding; GO:0008092 cytoskeletal protein binding; GO:0008324 monoatomic cation transmembrane transporter activity; GO:0008519 ammonium transmembrane transporter activity; GO:0015075 monoatomic ion transmembrane transporter activity; GO:0015267 channel activity; GO:0022803 passive transmembrane transporter activity; GO:0022840…			UR	KOG3796	Ammonium transporter RHBG
A2APA5	Protein FAM209 OS=Mus musculus OX=10090 GN=Fam209 PE=1 SV=1	Fam209	11.5978	0.00308458	Up	8.24	1	1	1	137537	176295	88439.8		1776870	1333440	0.195778	0.250948	0.12589		2.52929	1.89809	extracellular
