# Supplementary material for: ANKEF1 is a key axonemal component essential for murine sperm motility and male fertility
Source: eLife. 2025 Dec 29;14:RP105321. doi: 10.7554/eLife.105321 (PMC12747526; doi:10.7554/eLife.105321)
Supplement: Supplementary file 1. [file elife-105321-supp1.xlsx]

## Sheet: Description
Primer sequences for genotyping and RT-qPCR analysis of Ankef1 knockout mice.

## Sheet: Sheet1
Primer name	Sequence (5’→3’)
Ankef1-screen-F	GATGTTTCTCCCTTTCCCTTTCTTCCC
Ankef1-screen-R	CACCAAACCCGAAACCTGAAACCC
Ankef1-WT-F	CGATGATCCGAGTAGGGTCTTCGC
Ankef1-RT-PCR-F	gtgttctgttttactgcatcctgccca
Ankef1-RT-PCR-R	ctgcttaacggagtggagttgttgattg
