# Supplementary material for: ANKEF1 is a key axonemal component essential for murine sperm motility and male fertility
Source: eLife. 2025 Dec 29;14:RP105321. doi: 10.7554/eLife.105321 (PMC12747526; doi:10.7554/eLife.105321)
Supplement: Supplementary file 2. [file elife-105321-supp2.xlsx]

## Sheet: Description
Antibodies used in this study.

## Sheet: Sheet1
Antibodies	Species	Company source	Cat #	RRID
Flag	Mouse	Sigma	F1804	AB_262044
GAPDH	Mouse	ABclonal	AC033	AB_2769570
PRM2	Rabbit	proteintech	14500-1-AP	AB_2721024
BASIGIN	Mouse	Santa Cruz	sc-46700	AB_626912
AKAP4	Mouse	Abcam	ab56551	AB_2225892
α-Tubulin	Mouse	Proteintech	66031-1-Ig	AB_11042766
Myc	Rabbit	proteintech	16286-1-AP	AB_11182162
DRC11(IQCA1)	Rabbit	Bioss	bs-9020R
NME5	Rabbit	proteintech	12923-1-AP	AB_2152973
DNALI1	Rabbit	proteintech	17601-1-AP	AB_2095372
DNAI1	Rabbit	proteintech	12756-1-AP	AB_10643244
Anti-Mouse IgG	Goat	Sigma	A4416	AB_258167
Anti-Rabbit IgG	Goat	Sigma	A0545-1ml	AB_257896
