# Supplementary material for: ANKEF1 is a key axonemal component essential for murine sperm motility and male fertility
Source: eLife. 2025 Dec 29;14:RP105321. doi: 10.7554/eLife.105321 (PMC12747526; doi:10.7554/eLife.105321)
Supplement: Supplementary file 3. [file elife-105321-supp3.xlsx]

## Sheet: Description
Primer sequences for vector construction in co-immunoprecipitation (Co-IP) assays.

## Sheet: Sheet1
Primer name	Sequence (5’→3’)
pcDNA3.1-DRC1-cMYC-Primer F	GCTAGTTAAGCTTGGTACCGAGCTCGGATCCGCCACCatgaatccctcaggaaccattggggtc
pcDNA3.1-DRC1-cMYC-Primer R	CGAACCGCGGGCCCTCTAGACTCGAGCGGCCGCCttttgagggcatccggaagccctg
pcDNA3.1-DRC2-cMYC-Primer F	CTAGTTAAGCTTGGTACCGAGCTCGGATCCGCCACCatgtctaaaaaaggaaaaaagcccaagt
pcDNA3.1-DRC2-cMYC-Primer R	AACCGCGGGCCCTCTAGACTCGAGCGGCCGCCcaggatatgggaggcaatgtgg
pcDNA3.1-DRC3-cMYC-Primer F	TAGTTAAGCTTGGTACCGAGCTCGGATCCGCCACCatgagccggccatatgactcga
pcDNA3.1-DRC3-cMYC-Primer R	AACCGCGGGCCCTCTAGACTCGAGCGGCCGCCatctataatgtctccacattccaggttgt
pcDNA3.1-DRC4-cMYC-Primer F	CTAGTTAAGCTTGGTACCGAGCTCGGATCCGCCACCatggcacccaaaaagaaagggaag
pcDNA3.1-DRC4-cMYC-Primer R	GAACCGCGGGCCCTCTAGACTCGAGCGGCCGCCtgtaggggcacccacaagtcc
pCDNA3.1-TCTE1-cMYC-Primer F	GCTTGGTACCGAGCTCGGATCCGCCACCatgcaggaaaccccatcagtacc
pCDNA3.1-TCTE1-cMYC-Primer R	CCGCGGGCCCTCTAGACTCGAGCGGCCGCCgactacagaattctcagtac
pcDNA3.1-Fbxl13-cMYC-Primer F1	CTAGTTAAGCTTGGTACCGAGCTCGGATCCGCCACCatggcttcactacgcagtgcca
pcDNA3.1-Fbxl13-cMYC-Primer F2	gaacttggggaacggatgccacaa
pcDNA3.1-Fbxl13-cMYC-Primer R1	ttgtggcatccgttccccaagttc
pcDNA3.1-Fbxl13-cMYC-Primer R2	GAACCGCGGGCCCTCTAGACTCGAGCGGCCGCCttggtgtttggagtctggatcctcctc
pcDNA3.1-DRC7-cMYC-Primer F1	CTAGTTAAGCTTGGTACCGAGCTCGGATCCGCCACCatggaggtcctgagagagaaagtg
pcDNA3.1-DRC7-cMYC-Primer F2	ggcaaagaagaggaggataagagctttg
pcDNA3.1-DRC7-cMYC-Primer R1	caaagctcttatcctcctcttctttgcc
pcDNA3.1-DRC7-cMYC-Primer R2	GAACCGCGGGCCCTCTAGACTCGAGCGGCCGCCaacaaagacttttacgaagtctattaagcg
pcDNA3.1-DRC8-cMYC-Primer F	CTAGTTAAGCTTGGTACCGAGCTCGGATCCGCCACCatggcggaggaaagggacgcg
pcDNA3.1-DRC8-cMYC-Primer R	GAACCGCGGGCCCTCTAGACTCGAGCGGCCGCCattttcatctaccaccatcattgttatgtagtccc
pcDNA3.1-DRC9-cMYC-Primer F	CTAGTTAAGCTTGGTACCGAGCTCGGATCCGCCACCatggacgaggaagaggtggaag
pcDNA3.1-DRC9-cMYC-Primer R	GAACCGCGGGCCCTCTAGACTCGAGCGGCCGCCcttctttctcctcttctccttctcc
pcDNA3.1-DRC10-cMYC-Primer F	CTAGTTAAGCTTGGTACCGAGCTCGGATCCGCCACCatggccttggaccaggtcagcata
pcDNA3.1-DRC10-cMYC-Primer R	GAACCGCGGGCCCTCTAGACTCGAGCGGCCGCCcttcttcttgcctttgcccttggc
pcDNA3.1-DRC11-cMYC-Primer-F1	CTAGTTAAGCTTGGTACCGAGCTCGGATCCGCCACCatgacgccgtctctcagcgct
pcDNA3.1-DRC11-cMYC--Primer-F2	tacagtcagagatcaggatacaggttgatgagttgat
pcDNA3.1-DRC11-cMYC--Primer-R1	acctgtatcctgatctctgactgtaattcttttcgtttctcct
pcDNA3.1-DRC11-cMYC--Primer-R2	GAACCGCGGGCCCTCTAGACTCGAGCGGCCGCCtttccttttccctttgtcctttgccttttc
